# Supplementary material for: Novel insights into the genetic architecture of pregnancy glycemic traits from 14,744 Chinese maternities
Source: PubMed Central journal article supplement — Cell Genom. 2024 Oct 9;4(10):100631. doi: 10.1016/j.xgen.2024.100631 (PMC11602577; doi:10.1016/j.xgen.2024.100631), 2024-10-09
Supplement: mmc1.pdf [file mmc1.pdf]

**Cell Genomics, Volume 4**

**Supplemental information**

**Novel insights into the genetic architecture  
of pregnancy glycaemic traits  
from 14,744 Chinese maternities**

**Huanhuan Zhu, Han Xiao, Linxuan Li, Meng Yang, Ying Lin, Jieqiong Zhou, Xinyi Zhang, Yan Zhou, Xianmei Lan, Jiuying Liu, Jingyu Zeng, Lin Wang, Yuanyuan Zhong, Xiaobo Qian, Zhongqiang Cao, Panhong Liu, Hong Mei, Mingzhi Cai, Xiaonan Cai, Zhuangyuan Tang, Liqin Hu, Rui Zhou, Xun Xu, Huanming Yang, Jian Wang, Xin Jin, and Aifen Zhou**

**Figure S1.** The basic information of study participants, related to Table 1

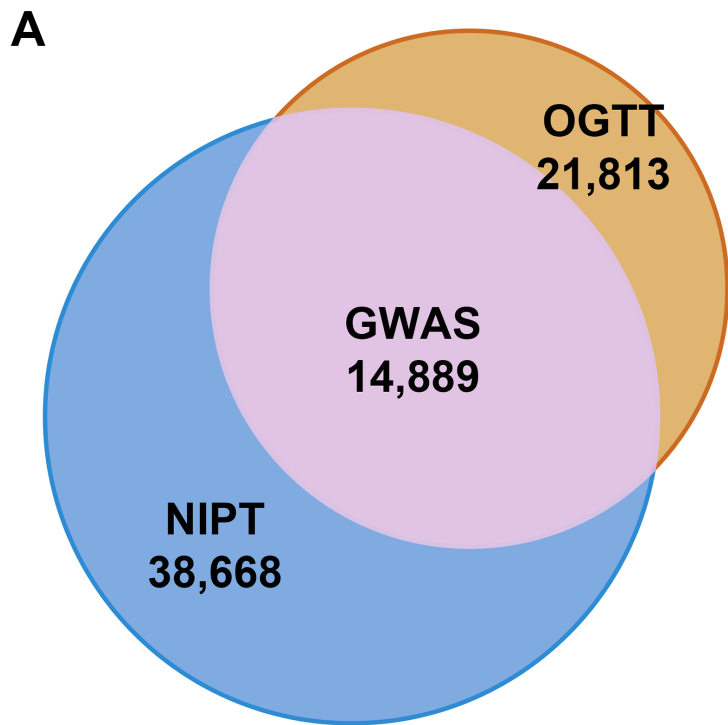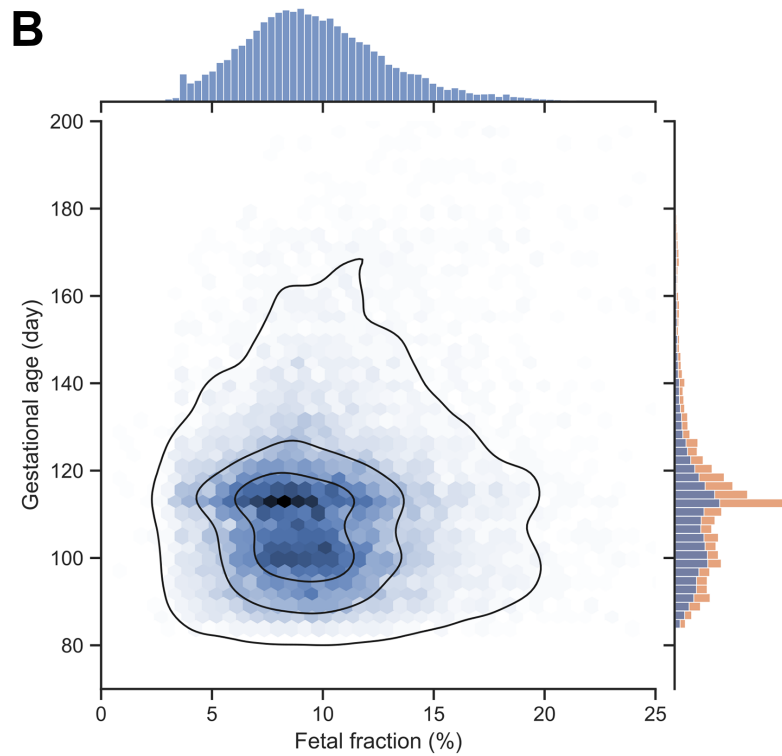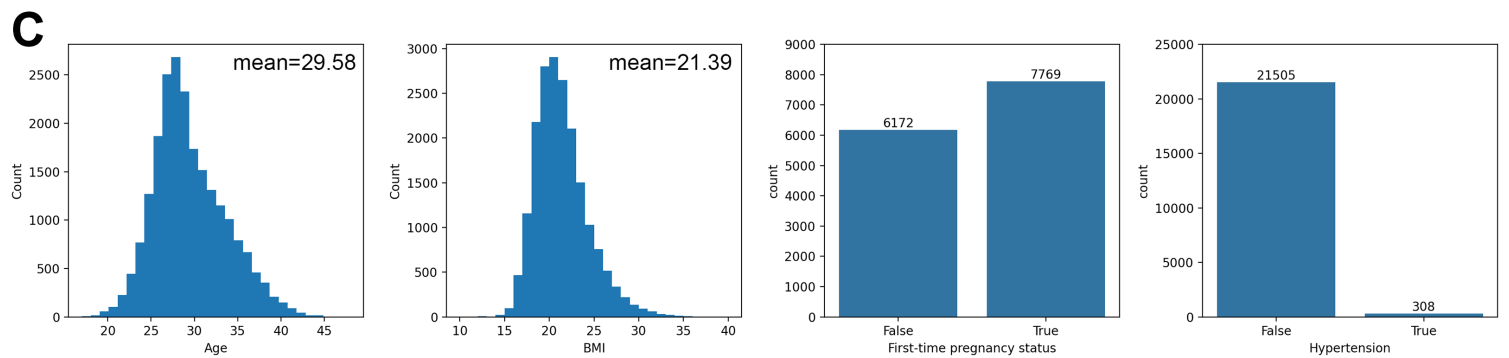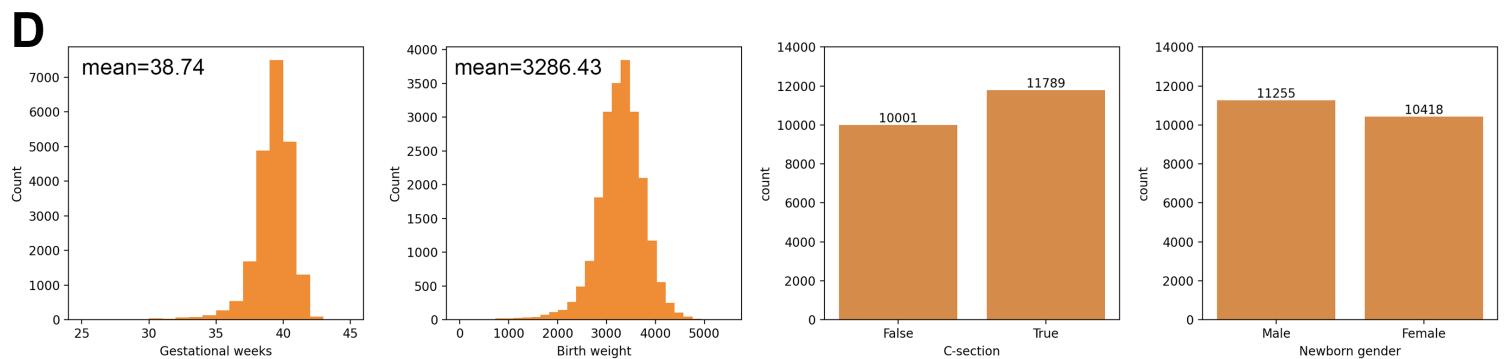

**Figure S2.** Statistics on glyceimic traits and regression analysis with laboratory features, related to Table 1

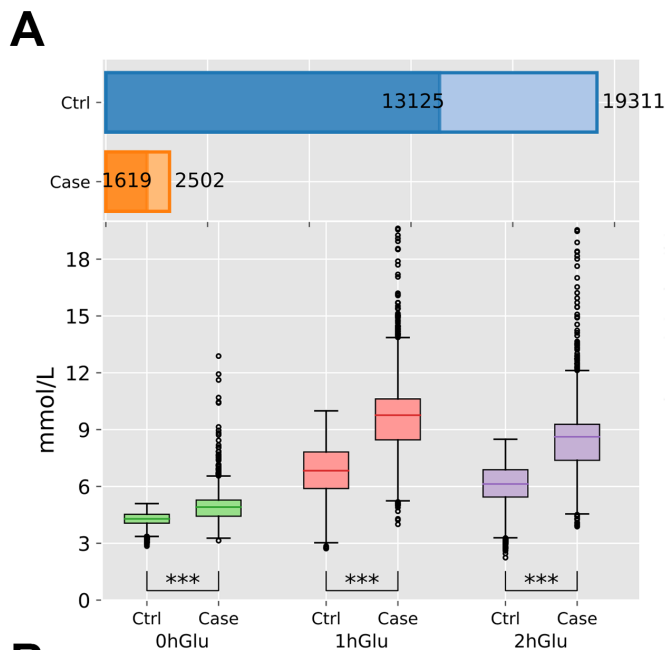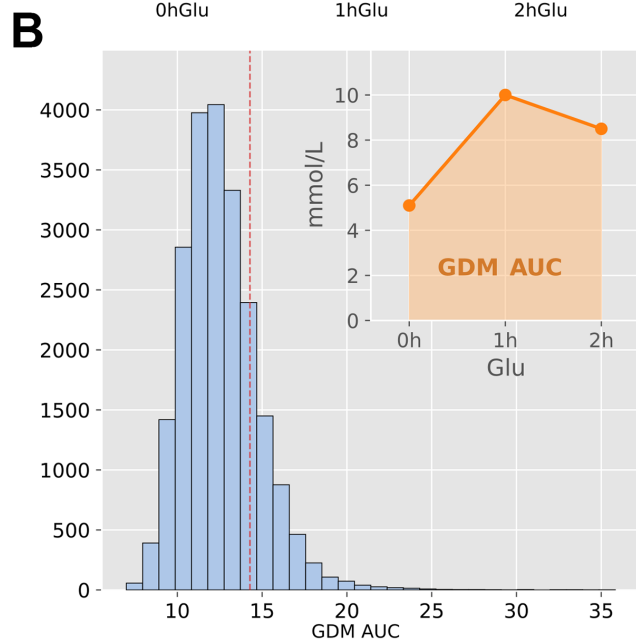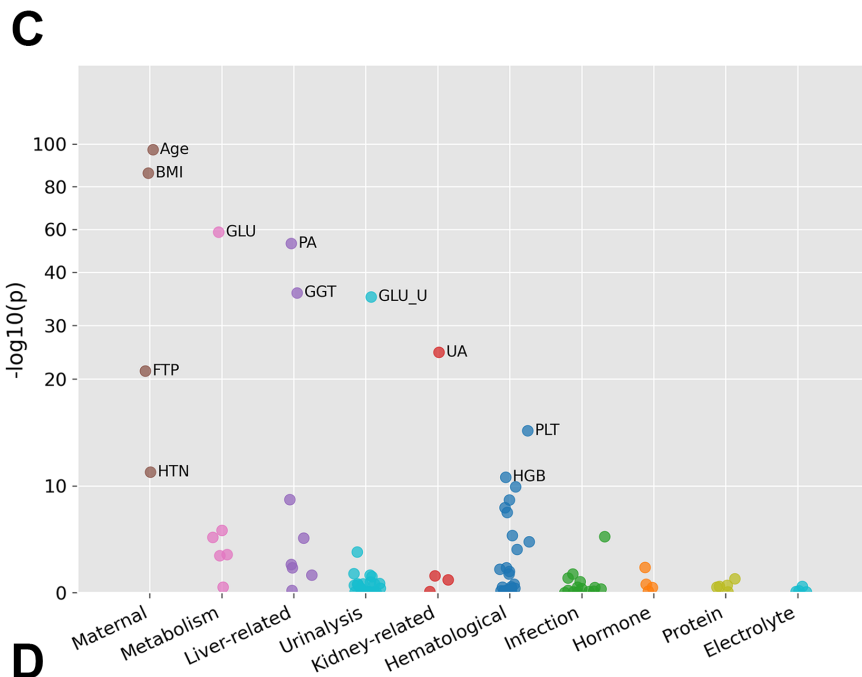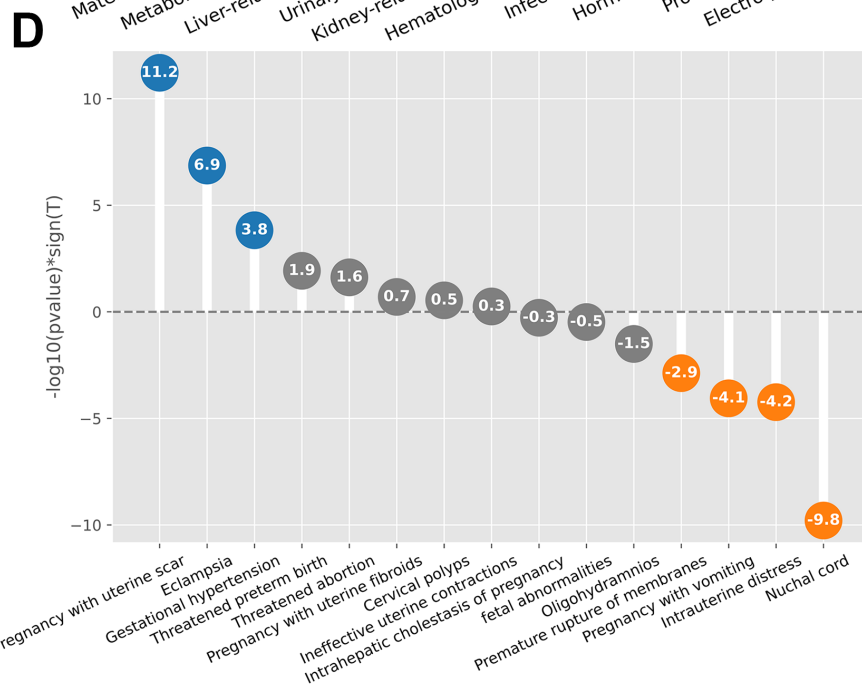

**Figure S3.** The assessment of sequencing and genotype imputation, related to STAR Methods

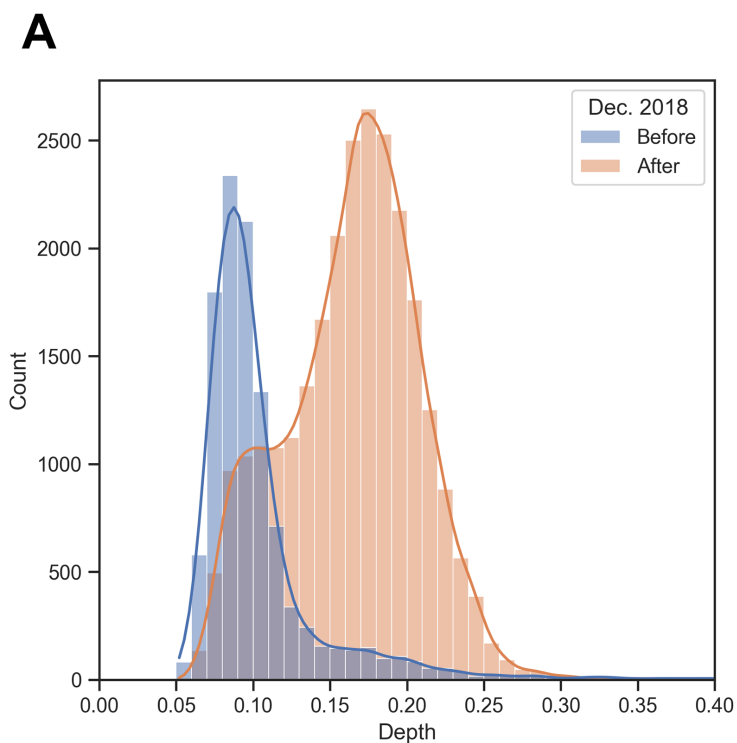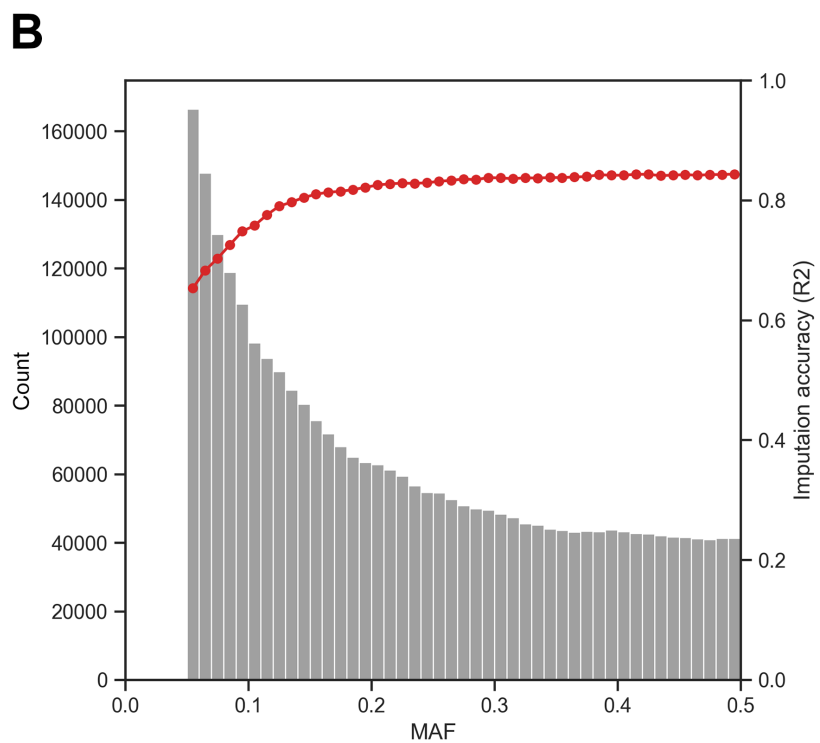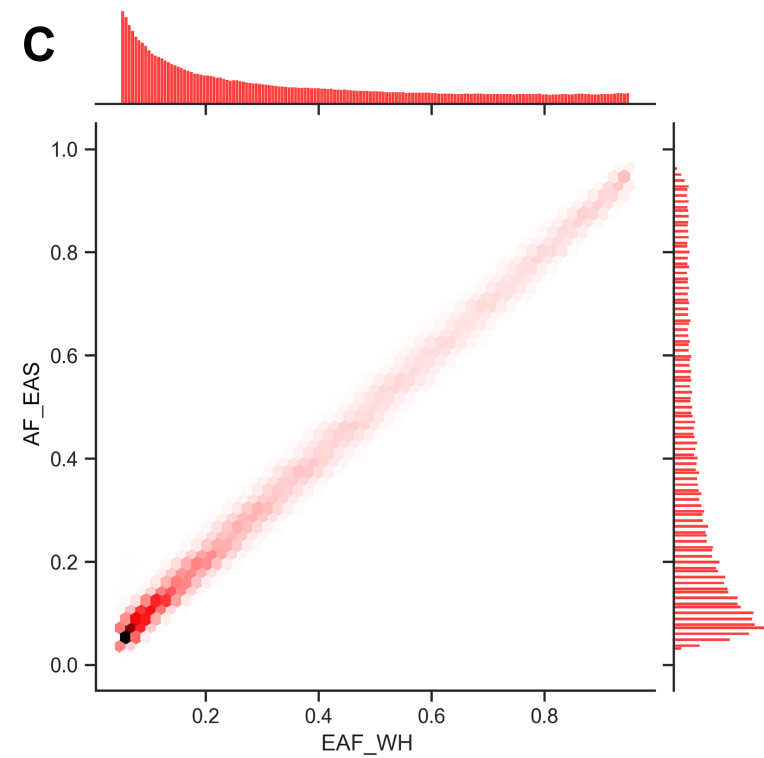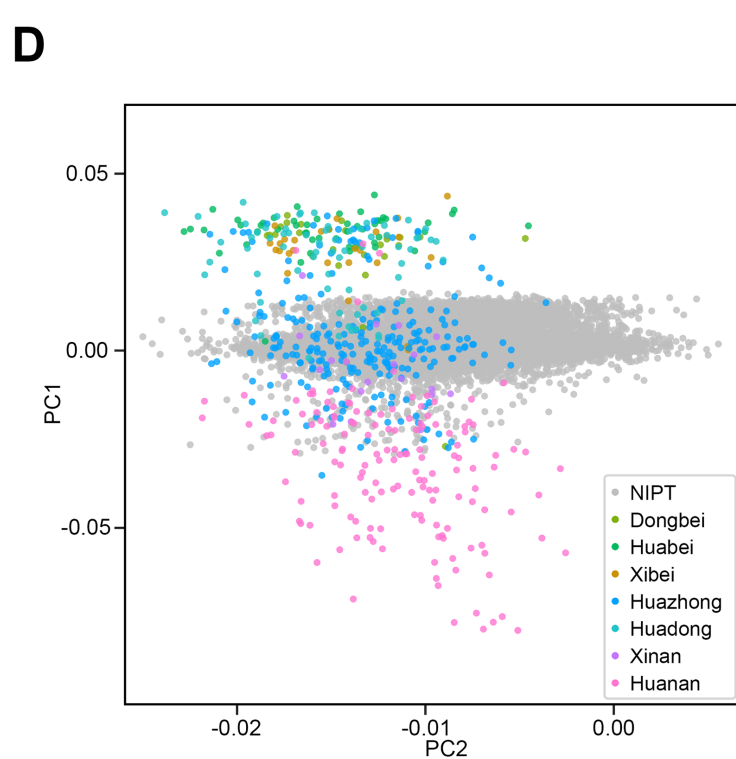

**Figure S4.** The results of colocalization analysis between discovery and replication studies in the region of gene *ESR1*, related to Figure 1

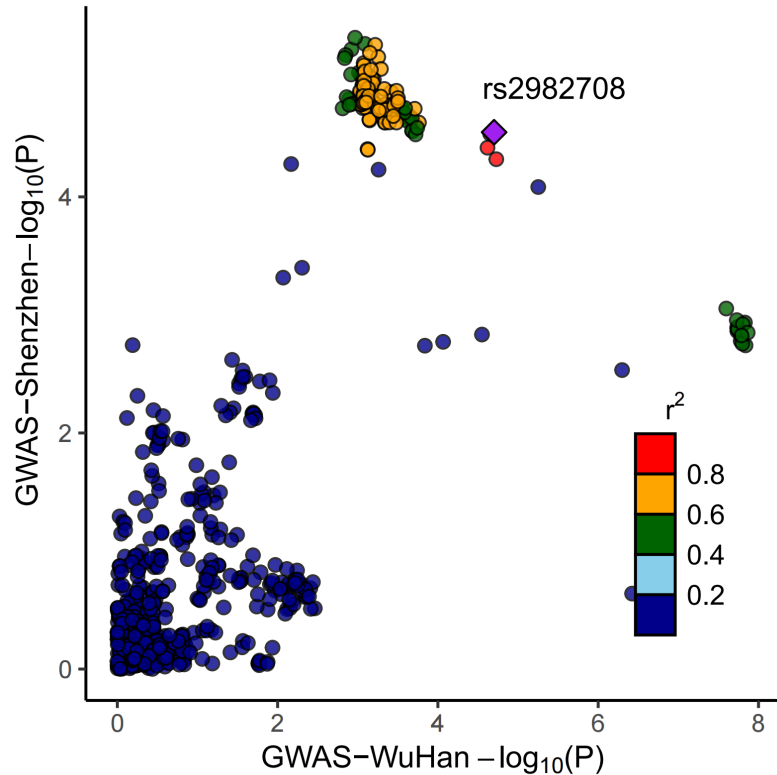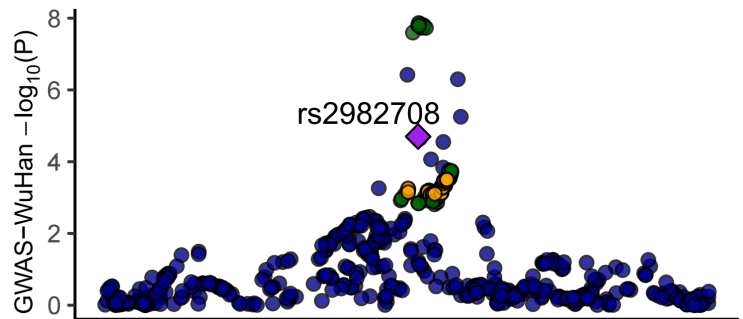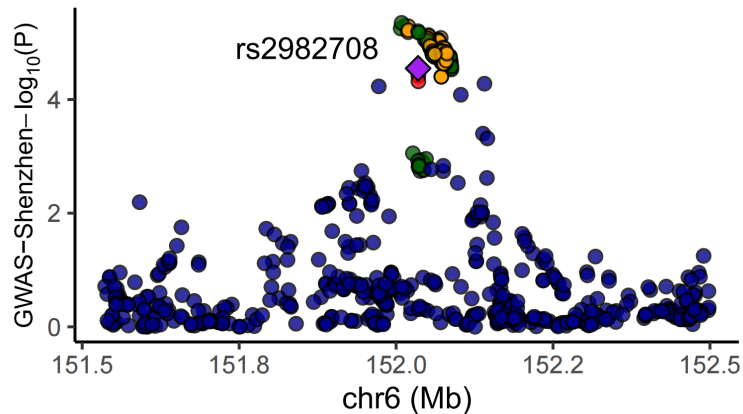

**Figure S5.** The TWAS results between GTEx data and glycemic traits, related to STAR Methods

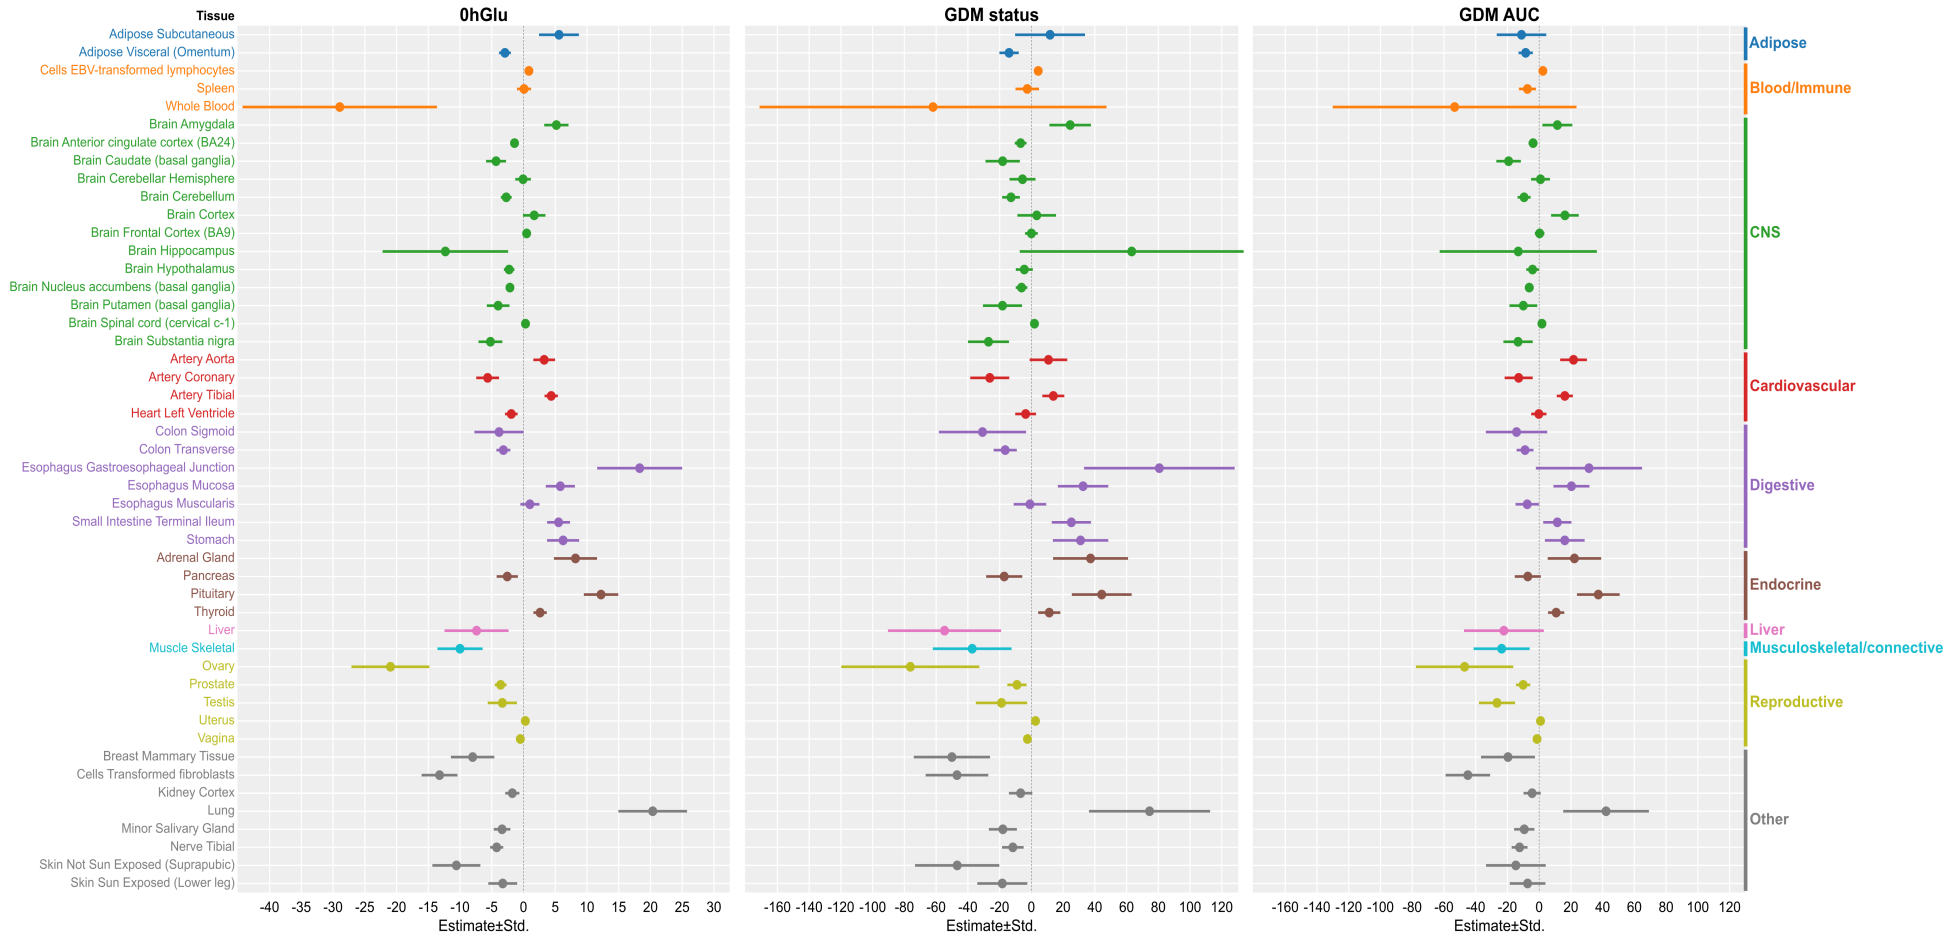

**Figure S6.** The top ten drug ATC classifications from DTEA analysis, related to STAR Methods

Anatomical therapeutic chemical classification

**0hGlu**

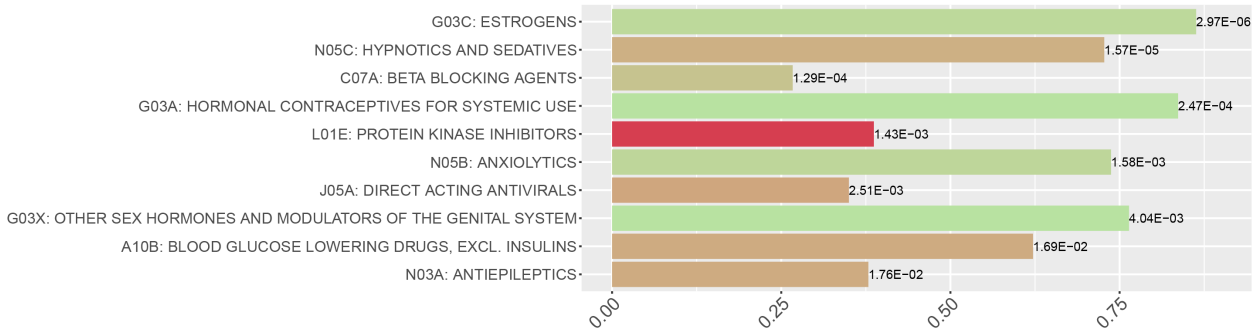

**GDM status**

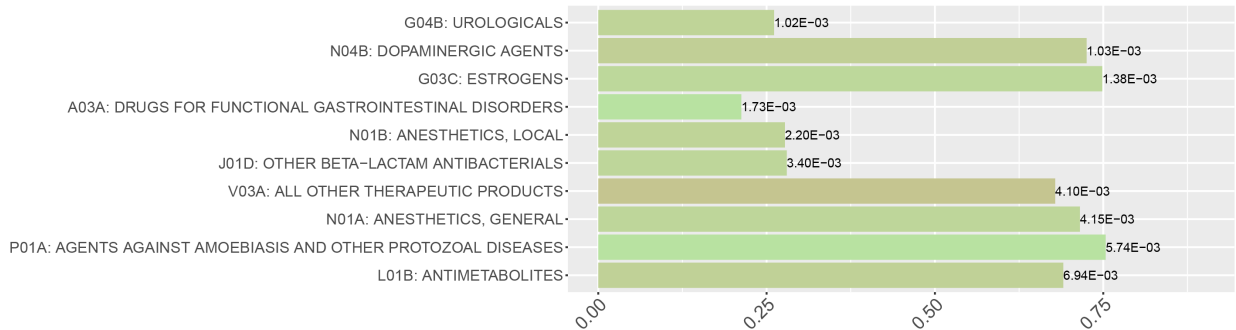

**GDM AUC**

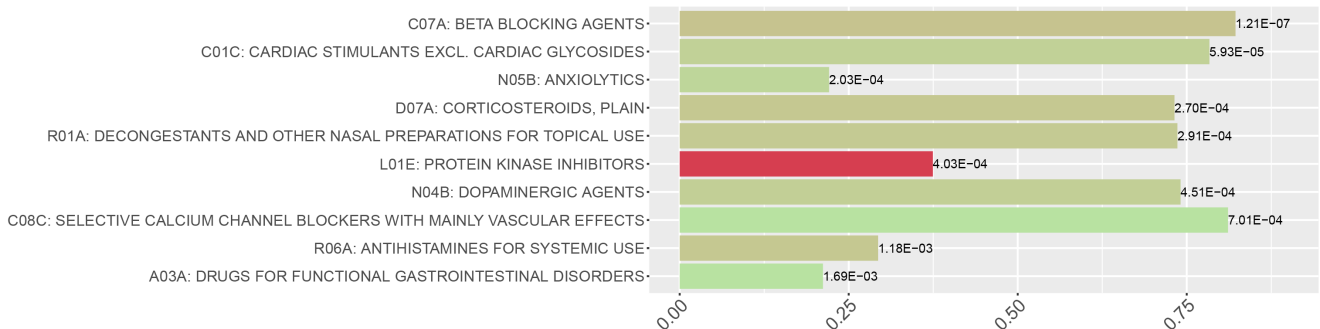

**Area under the curve**

**Table S1. The univariate regression analysis of GDM status and GDM AUC on early-stage laboratory traits, related to Table 1**

| Trait information |                                                   |              |       |                    | GDM status univariate regression |       |                 | GDM AUC univariate regression |       |                  |
|-------------------|---------------------------------------------------|--------------|-------|--------------------|----------------------------------|-------|-----------------|-------------------------------|-------|------------------|
| Category          | Trait                                             | Abbreviation | n     | mean±std   case(%) | beta                             | std.  | pvalue          | beta                          | std.  | pvalue           |
| Metabolism        | Blood glucose                                     | GLU          | 11557 | 4.51±0.48          | 1.101                            | 0.068 | <b>1.75E-59</b> | 1.219                         | 0.048 | <b>3.29E-140</b> |
| Liver-related     | Prealbumin                                        | PA           | 17417 | 224.17±36.74       | 0.011                            | 0.001 | <b>3.26E-54</b> | 0.011                         | 0.001 | <b>1.83E-114</b> |
| Liver-related     | $\gamma$ -glutamyl transferase                    | GGT          | 17417 | 14.30±10.11        | 0.027                            | 0.002 | <b>7.36E-37</b> | 0.033                         | 0.002 | <b>1.74E-67</b>  |
| Urinalysis        | Urine glucose                                     | GLU U        | 18619 | 2187(11.75%)       | 0.825                            | 0.066 | <b>4.29E-36</b> | 0.957                         | 0.056 | <b>3.77E-65</b>  |
| Kidney-related    | Uric acid                                         | UA           | 17807 | 212.06±48.87       | 0.005                            | 0.001 | <b>9.21E-26</b> | 0.005                         | 0.000 | <b>2.45E-44</b>  |
| Hematological     | Platelet count                                    | PLT          | 18790 | 237.63±55.22       | 0.004                            | 0.000 | <b>6.86E-16</b> | 0.004                         | 0.000 | <b>2.09E-30</b>  |
| Hematological     | Hemoglobin                                        | HGB          | 18790 | 125.17±10.25       | 0.017                            | 0.003 | <b>1.55E-11</b> | 0.015                         | 0.002 | <b>6.46E-18</b>  |
| Hematological     | White blood cell count                            | WBC          | 18790 | 9.17±2.13          | 0.076                            | 0.012 | <b>1.21E-10</b> | 0.077                         | 0.008 | <b>1.91E-19</b>  |
| Liver-related     | Alkaline phosphatase                              | ALP          | 17417 | 44.24±10.41        | 0.015                            | 0.002 | <b>1.94E-09</b> | 0.018                         | 0.002 | <b>5.60E-24</b>  |
| Hematological     | Plateletcrit                                      | PCT          | 15752 | 0.23±0.06          | 2.866                            | 0.478 | <b>2.02E-09</b> | 2.698                         | 0.341 | <b>2.63E-15</b>  |
| Hematological     | Red blood cell count                              | RBC          | 18790 | 4.26±0.38          | 0.380                            | 0.067 | <b>1.12E-08</b> | 0.367                         | 0.047 | <b>9.55E-15</b>  |
| Hematological     | Hematocrit                                        | HCT          | 18790 | 37.67±2.98         | 0.048                            | 0.009 | <b>2.97E-08</b> | 0.047                         | 0.006 | <b>1.47E-14</b>  |
| Metabolism        | Oral glucose tolerance test-fasting               | OGTT0h       | 102   | 5.02±1.07          | 4.227                            | 0.877 | <b>1.43E-06</b> | 2.925                         | 0.270 | <b>3.04E-18</b>  |
| Hematological     | platelet larger cell ratio                        | P-LCR        | 15646 | 28.46±7.90         | -0.017                           | 0.004 | <b>4.30E-06</b> | -0.014                        | 0.003 | <b>3.71E-08</b>  |
| Infection         | Herpes simplex virus type 2 specific IgG antibody | HSV-2 IgG    | 6591  | 474(7.19%)         | 0.640                            | 0.141 | <b>5.48E-06</b> | 0.410                         | 0.121 | 6.86E-04         |
| Metabolism        | Hemoglobin A1c                                    | HbA1C        | 230   | 5.20±0.56          | 2.527                            | 0.560 | <b>6.38E-06</b> | 3.758                         | 0.328 | <b>7.14E-23</b>  |
| Liver-related     | Alanine aminotransferase                          | ALT          | 17419 | 16.92±16.50        | 0.006                            | 0.001 | <b>7.99E-06</b> | 0.010                         | 0.001 | <b>5.51E-18</b>  |
| Hematological     | Neutrophil count                                  | NEU          | 12698 | 6.64±1.81          | 0.073                            | 0.017 | <b>1.75E-05</b> | 0.079                         | 0.012 | <b>8.34E-11</b>  |
| Hematological     | Lymphocyte count                                  | LYM          | 12698 | 1.81±0.50          | 0.245                            | 0.063 | <b>9.11E-05</b> | 0.192                         | 0.044 | <b>1.36E-05</b>  |
| Urinalysis        | Urine PH level                                    | pH           | 18619 | 6.54±0.71          | -0.143                           | 0.038 | <b>1.53E-04</b> | -0.082                        | 0.026 | 1.71E-03         |
| Metabolism        | Oral glucose tolerance test-1 hour                | OGTT1h       | 68    | 9.75±2.81          | 0.734                            | 0.201 | <b>2.68E-04</b> | 1.496                         | 0.056 | <b>2.87E-37</b>  |
| Metabolism        | Oral glucose tolerance test-2 hour                | OGTT2h       | 68    | 8.16±2.65          | 0.727                            | 0.204 | <b>3.54E-04</b> | 1.499                         | 0.087 | <b>4.95E-26</b>  |
| Liver-related     | Total bilirubin                                   | TBIL         | 17417 | 8.43±3.47          | -0.025                           | 0.008 | 2.24E-03        | -0.027                        | 0.005 | <b>8.34E-07</b>  |
| Hormone           | Free triiodothyronine                             | FT3          | 17500 | 3.39±0.77          | 0.086                            | 0.030 | 4.32E-03        | 0.082                         | 0.024 | 5.72E-04         |
| Liver-related     | Direct bilirubin                                  | DBIL         | 17417 | 3.06±1.20          | -0.068                           | 0.024 | 4.49E-03        | -0.090                        | 0.016 | <b>8.04E-09</b>  |
| Hematological     | Monocyte count                                    | MONO         | 12698 | 0.51±0.18          | 0.471                            | 0.167 | 4.66E-03        | 0.360                         | 0.118 | 2.29E-03         |
| Hematological     | Platelet size deviation width                     | PDW          | 18634 | 13.03±2.44         | -0.030                           | 0.011 | 6.56E-03        | -0.025                        | 0.007 | 6.60E-04         |
| Hematological     | Mean platelet volume                              | MPV          | 18634 | 9.95±1.45          | -0.046                           | 0.018 | 1.00E-02        | -0.049                        | 0.013 | <b>9.50E-05</b>  |
| Urinalysis        | Ketones in urine                                  | KET          | 18619 | 6057(32.53%)       | 0.131                            | 0.054 | 1.62E-02        | 0.102                         | 0.039 | 9.13E-03         |
| Hematological     | Mean corpuscular hemoglobin concentration         | MCHC         | 18790 | 332.57±15.96       | 0.004                            | 0.002 | 1.75E-02        | 0.002                         | 0.001 | 5.56E-02         |
| Infection         | C-reactive protein                                | CRP          | 4134  | 5.17±6.45          | 0.017                            | 0.007 | 1.80E-02        | 0.014                         | 0.007 | 3.31E-02         |
| Urinalysis        | Crystals in Urine                                 | X'TAL U      | 18453 | 7.97±117.71        | 0.001                            | 0.000 | 2.21E-02        | 0.000                         | 0.000 | 9.79E-02         |
| Liver-related     | Aspartate aminotransferase                        | AST          | 17417 | 17.70±8.81         | 0.006                            | 0.003 | 2.22E-02        | 0.010                         | 0.002 | <b>1.08E-06</b>  |
| Kidney-related    | Serum creatinine                                  | Cr           | 17807 | 43.45±6.23         | -0.010                           | 0.004 | 2.63E-02        | -0.015                        | 0.003 | <b>3.17E-07</b>  |
| Urinalysis        | Small round epithelial cells in urine             | SRC U        | 18453 | 3.48±4.76          | 0.013                            | 0.006 | 3.18E-02        | 0.009                         | 0.005 | 5.27E-02         |
| Infection         | Hepatitis B envelope antibody                     | HBeAb        | 17851 | 1.41±0.76          | -0.079                           | 0.039 | 4.33E-02        | -0.063                        | 0.024 | 9.01E-03         |
| Protein           | Ferritin                                          | Ferr         | 938   | 82.26±66.15        | 0.003                            | 0.002 | 5.09E-02        | 0.001                         | 0.001 | 3.06E-01         |
| Kidney-related    | Cystatin C                                        | CysC         | 17624 | 0.67±0.16          | 0.325                            | 0.173 | 6.07E-02        | 0.287                         | 0.119 | 1.62E-02         |
| Infection         | Hepatitis B core antibody                         | HBeAb        | 17851 | 1.46±0.86          | -0.051                           | 0.030 | 9.61E-02        | -0.073                        | 0.022 | 7.44E-04         |
| Urinalysis        | Urine specific gravity                            | SG           | 18619 | 1.02±0.01          | 5.653                            | 3.430 | 9.93E-02        | 1.187                         | 2.405 | 6.22E-01         |
| Urinalysis        | Leukocytes esterase in urine                      | LEU          | 18619 | 9282(49.85%)       | -0.076                           | 0.052 | 1.42E-01        | -0.089                        | 0.037 | 1.56E-02         |
| Urinalysis        | Casts in urine                                    | CAST U       | 18452 | 3.17±4.20          | -0.010                           | 0.007 | 1.44E-01        | -0.014                        | 0.005 | 1.79E-03         |
| Urinalysis        | Urine clarity                                     | Clarity      | 18608 | 8491(45.63%)       | -0.076                           | 0.052 | 1.46E-01        | -0.086                        | 0.037 | 1.97E-02         |
| Urinalysis        | Urine conductivity                                | Cond         | 18452 | 18.07±8.34         | -0.004                           | 0.003 | 1.52E-01        | -0.003                        | 0.002 | 2.08E-01         |
| Hormone           | Free thyroxine                                    | FT4          | 17501 | 2.81±5.19          | -0.007                           | 0.005 | 1.62E-01        | -0.005                        | 0.004 | 1.98E-01         |
| Hematological     | Mean corpuscular volume                           | MCV          | 18790 | 88.61±5.43         | -0.006                           | 0.005 | 1.69E-01        | -0.004                        | 0.003 | 1.93E-01         |



|                |                                                      |                |       |                   |        |       |          |        |       |          |
|----------------|------------------------------------------------------|----------------|-------|-------------------|--------|-------|----------|--------|-------|----------|
| Urinalysis     | Protein in urine                                     | PRO            | 18602 | 11542(62.05%)     | 0.072  | 0.054 | 1.86E-01 | 0.047  | 0.038 | 2.11E-01 |
| Protein        | Albumin/globulin ratio                               | AGR            | 17417 | 1.68±0.24         | -0.147 | 0.115 | 1.99E-01 | -0.110 | 0.080 | 1.69E-01 |
| Urinalysis     | Unlysed red blood cell percentage in urine           | Unlysed RBC(%) | 18453 | 68.27±22.97       | -0.001 | 0.001 | 2.03E-01 | 0.000  | 0.001 | 8.09E-01 |
| Electrolyte    | Sodium                                               | Na             | 150   | 137.15±2.33       | 0.209  | 0.183 | 2.54E-01 | -0.013 | 0.076 | 8.69E-01 |
| Protein        | Globulin                                             | GLB            | 17417 | 26.73±3.16        | 0.010  | 0.008 | 2.56E-01 | 0.008  | 0.006 | 1.78E-01 |
| Hematological  | Neutrophil percentage                                | NEU%           | 12698 | 72.67±5.89        | 0.006  | 0.006 | 2.84E-01 | 0.009  | 0.004 | 2.23E-02 |
| Protein        | Total protein                                        | TP             | 17417 | 70.89±3.83        | 0.007  | 0.007 | 2.97E-01 | 0.005  | 0.005 | 3.48E-01 |
| Metabolism     | Vitamin D                                            | Vit D          | 1401  | 19.60±6.93        | -0.012 | 0.012 | 2.98E-01 | 0.000  | 0.009 | 9.74E-01 |
| Hematological  | Red cell distribution width-coefficient of variation | RDW-CV         | 18782 | 13.31±1.37        | -0.020 | 0.020 | 3.07E-01 | -0.016 | 0.013 | 2.37E-01 |
| Infection      | Cytomegalovirus IgG antibody                         | CMV IgG        | 6928  | 6445(93.03%)      | 0.176  | 0.174 | 3.11E-01 | 0.133  | 0.118 | 2.57E-01 |
| Infection      | Hepatitis B envelope antigen                         | HBeAg          | 17851 | 10.88±140.44      | 0.000  | 0.000 | 3.18E-01 | 0.000  | 0.000 | 3.44E-01 |
| Hormone        | β-human chorionic gonadotropin                       | β-hCG          | 8250  | 36380.08±48609.71 | 0.000  | 0.000 | 3.24E-01 | 0.000  | 0.000 | 2.72E-01 |
| Urinalysis     | Bacteria count in urine                              | BACT U         | 18606 | 1037.48±2397.54   | 0.000  | 0.000 | 3.74E-01 | 0.000  | 0.000 | 2.32E-02 |
| Urinalysis     | Bilirubin in urine                                   | BIL            | 18619 | 129(0.69%)        | 0.242  | 0.279 | 3.85E-01 | -0.372 | 0.215 | 8.39E-02 |
| Hematological  | Lymphocyte percentage                                | LYM%           | 12698 | 20.41±5.07        | -0.005 | 0.006 | 3.96E-01 | -0.009 | 0.004 | 4.06E-02 |
| Hematological  | Eosinophil percentage                                | EOS%           | 12698 | 1.05±1.01         | -0.028 | 0.033 | 3.98E-01 | -0.013 | 0.022 | 5.50E-01 |
| Infection      | Rubella IgM antibody                                 | Rub IgM        | 8675  | 72(0.83%)         | -0.381 | 0.467 | 4.15E-01 | -0.160 | 0.278 | 5.66E-01 |
| Infection      | Rubella IgG antibody                                 | Rub IgG        | 7250  | 5765(79.52%)      | -0.074 | 0.099 | 4.58E-01 | -0.066 | 0.071 | 3.54E-01 |
| Hematological  | Monocyte percentage                                  | MONO%          | 12698 | 5.67±1.77         | -0.012 | 0.018 | 4.95E-01 | -0.021 | 0.012 | 9.51E-02 |
| Urinalysis     | White blood cell count in urine                      | WBC U          | 18607 | 72.35±270.76      | 0.000  | 0.000 | 5.04E-01 | 0.000  | 0.000 | 5.69E-01 |
| Infection      | Herpes simplex virus type 2 specific IgM antibody    | HSV-2 IgM      | 6592  | 18(0.27%)         | 0.371  | 0.770 | 6.30E-01 | -0.539 | 0.627 | 3.90E-01 |
| Liver-related  | Total bile acid                                      | TBA            | 230   | 2.36±2.82         | -0.069 | 0.150 | 6.46E-01 | 0.037  | 0.078 | 6.39E-01 |
| Electrolyte    | Calcium                                              | Ca             | 150   | 2.36±0.10         | 1.504  | 3.602 | 6.76E-01 | -2.491 | 1.669 | 1.38E-01 |
| Hematological  | Mean corpuscular hemoglobin                          | MCH            | 18790 | 29.45±1.94        | 0.005  | 0.013 | 6.87E-01 | 0.001  | 0.009 | 9.20E-01 |
| Hematological  | Basophil count                                       | BASO           | 12698 | 0.02±0.04         | 0.237  | 0.596 | 6.91E-01 | 1.095  | 0.544 | 4.43E-02 |
| Hematological  | Eosinophil count                                     | EOS            | 12698 | 0.10±0.10         | 0.110  | 0.322 | 7.31E-01 | 0.170  | 0.225 | 4.48E-01 |
| Infection      | Hepatitis B surface antibody                         | HBsAb          | 17851 | 335.96±390.31     | 0.000  | 0.000 | 7.42E-01 | 0.000  | 0.000 | 6.38E-01 |
| Hormone        | Thyroid-stimulating hormone                          | TSH            | 17627 | 1.52±2.16         | -0.004 | 0.014 | 7.50E-01 | -0.005 | 0.008 | 5.80E-01 |
| Urinalysis     | Red blood cell count in urine                        | RBC U          | 18607 | 28.61±176.91      | 0.000  | 0.000 | 7.88E-01 | 0.000  | 0.000 | 3.11E-01 |
| Urinalysis     | Epithelial cell count in urine                       | EC U           | 18452 | 36.36±44.17       | 0.000  | 0.001 | 7.90E-01 | 0.000  | 0.000 | 4.56E-01 |
| Kidney-related | Blood urea nitrogen                                  | BUN            | 17807 | 2.77±0.74         | 0.009  | 0.036 | 8.00E-01 | 0.007  | 0.025 | 7.85E-01 |
| Infection      | Toxoplasma gondii IgG antibody                       | TOX IgG        | 6974  | 553(7.93%)        | -0.043 | 0.171 | 8.01E-01 | -0.071 | 0.121 | 5.55E-01 |
| Electrolyte    | Chloride                                             | CL             | 150   | 100.65±3.02       | 0.031  | 0.126 | 8.07E-01 | 0.093  | 0.057 | 1.07E-01 |
| Infection      | Hepatitis C virus antibody                           | Anti-HCV       | 18244 | 0.19±3.01         | 0.002  | 0.009 | 8.28E-01 | 0.004  | 0.006 | 5.64E-01 |
| Urinalysis     | Nitrites in urine                                    | NIT            | 18619 | 176(0.95%)        | 0.053  | 0.267 | 8.43E-01 | -0.079 | 0.192 | 6.81E-01 |
| Urinalysis     | Fibers in urine                                      | FIBERS         | 18608 | 2.03±8.55         | 0.001  | 0.003 | 8.55E-01 | 0.000  | 0.002 | 9.90E-01 |
| Urinalysis     | Yeast-like cell in urine                             | YLC            | 18608 | 3.39±24.87        | 0.000  | 0.001 | 8.57E-01 | 0.000  | 0.001 | 9.85E-01 |
| Protein        | Albumin                                              | ALB            | 17417 | 44.17±2.52        | 0.002  | 0.011 | 8.74E-01 | -0.002 | 0.007 | 7.92E-01 |
| Electrolyte    | Potassium                                            | K              | 150   | 3.92±0.40         | 0.128  | 0.821 | 8.76E-01 | 0.276  | 0.403 | 4.96E-01 |
| Urinalysis     | Urinary tract infection                              | UTI            | 18453 | 13304(72.10%)     | 0.009  | 0.058 | 8.78E-01 | 0.019  | 0.041 | 6.46E-01 |
| Urinalysis     | Lysed red blood cell percentage in urine             | Lysed RBC(%)   | 18453 | 5.18±13.95        | 0.000  | 0.002 | 8.80E-01 | 0.000  | 0.001 | 7.52E-01 |
| Infection      | Toxoplasma gondii IgM antibody                       | TOX IgM        | 6975  | 19(0.27%)         | -0.128 | 1.055 | 9.03E-01 | 0.213  | 0.718 | 7.66E-01 |
| Hematological  | Basophil percentage                                  | BASO%          | 12698 | 0.20±0.24         | 0.014  | 0.114 | 9.04E-01 | 0.153  | 0.085 | 7.25E-02 |
| Hematological  | Red cell distribution width-standard deviation       | RDW-SD         | 15799 | 41.60±3.24        | -0.001 | 0.009 | 9.26E-01 | 0.000  | 0.006 | 9.64E-01 |
| Urinalysis     | Urobilinogen                                         | UBG            | 18619 | 1376(7.39%)       | -0.006 | 0.100 | 9.51E-01 | -0.161 | 0.070 | 2.22E-02 |
| Urinalysis     | Blood in urine                                       | BLD            | 18619 | 4787(25.71%)      | -0.003 | 0.059 | 9.54E-01 | 0.052  | 0.042 | 2.14E-01 |
| Infection      | Cytomegalovirus IgM antibody                         | CMV IgM        | 6929  | 36(0.52%)         | -0.013 | 1.062 | 9.90E-01 | 0.806  | 0.757 | 2.87E-01 |

**Table S2. The multiple regression results of GDM status with potential risk factors, related to Table 1**

|                            |                               |               |          |                 |
|----------------------------|-------------------------------|---------------|----------|-----------------|
| <b>Model:</b>              | Logit                         |               |          |                 |
| <b>Method:</b>             | Maximum Likelihood Estimation |               |          |                 |
| <b>Df Model:</b>           | 20                            |               |          |                 |
| <b>No. Observations:</b>   | 3472                          |               |          |                 |
| <b>Pseudo R-squared:</b>   | 0.132                         |               |          |                 |
| <b>Log-Likelihood:</b>     | -872.266                      |               |          |                 |
| <b>LL-Null:</b>            | -970.913                      |               |          |                 |
| <b>Prob (F-statistic):</b> | 3.86E-31                      |               |          |                 |
| <b>variables</b>           | <b>coef</b>                   | <b>stderr</b> | <b>z</b> | <b>P&gt; z </b> |
| Intercept                  | -12.524                       | 1.597         | -7.841   | 4.46E-15        |
| Age                        | 0.122                         | 0.019         | 6.311    | <b>2.78E-10</b> |
| GLU U                      | 0.907                         | 0.176         | 5.156    | <b>2.52E-07</b> |
| GGT                        | 0.031                         | 0.006         | 4.721    | <b>2.35E-06</b> |
| UA                         | 0.006                         | 0.001         | 4.075    | <b>4.61E-05</b> |
| PA                         | 0.007                         | 0.002         | 3.555    | <b>3.78E-04</b> |
| ALT                        | -0.016                        | 0.006         | -2.701   | 6.90E-03        |
| BMI                        | 0.032                         | 0.02          | 1.556    | 1.20E-01        |
| HTN                        | 0.533                         | 0.406         | 1.312    | 1.89E-01        |
| ALP                        | 0.009                         | 0.007         | 1.294    | 1.96E-01        |
| FTP                        | -0.166                        | 0.146         | -1.135   | 2.56E-01        |
| HGB                        | 0.016                         | 0.017         | 0.941    | 3.47E-01        |
| NEU                        | 0.18                          | 0.229         | 0.788    | 4.31E-01        |
| WBC                        | -0.148                        | 0.219         | -0.674   | 5.01E-01        |
| RBC                        | -0.195                        | 0.32          | -0.61    | 5.42E-01        |
| PLT                        | 0.004                         | 0.008         | 0.53     | 5.96E-01        |
| LYM                        | 0.153                         | 0.297         | 0.514    | 6.07E-01        |
| pH                         | 0.046                         | 0.095         | 0.478    | 6.33E-01        |
| P-LCR                      | 0.008                         | 0.023         | 0.34     | 7.34E-01        |
| PCT                        | -2.755                        | 8.146         | -0.338   | 7.35E-01        |
| HCT                        | 0.007                         | 0.06          | 0.12     | 9.05E-01        |

*Notes:* HTN, FTP, Age and BMI are abbreviations for hypertension, first-time pregnancy, maternal age and body mass index, respectively. The full names of other abbreviations are provided in [Table S1](#).

**Table S3. The multiple regression analysis of GDM AUC with potential risk factors, related to Table 1**

|                            |                       |               |          |                 |
|----------------------------|-----------------------|---------------|----------|-----------------|
| <b>Model:</b>              | Ordinary Least Square |               |          |                 |
| <b>Method:</b>             | Least Squares         |               |          |                 |
| <b>Df Model:</b>           | 24                    |               |          |                 |
| <b>No. Observations:</b>   | 3472                  |               |          |                 |
| <b>R-squared:</b>          | 0.132                 |               |          |                 |
| <b>F-statistic:</b>        | 21.783                |               |          |                 |
| <b>Prob (F-statistic):</b> | 4.50E-88              |               |          |                 |
| <b>variables</b>           | <b>coef</b>           | <b>stderr</b> | <b>z</b> | <b>P&gt; z </b> |
| Intercept                  | 4.202                 | 2.287         | 1.837    | 6.62E-02        |
| Age                        | 0.123                 | 0.011         | 11.186   | <b>1.47E-28</b> |
| UA                         | 0.005                 | 0.001         | 6.193    | <b>6.61E-10</b> |
| PA                         | 0.006                 | 0.001         | 5.559    | <b>2.92E-08</b> |
| GLU U                      | 0.625                 | 0.114         | 5.491    | <b>4.28E-08</b> |
| Cr                         | -0.032                | 0.006         | -5.416   | <b>6.52E-08</b> |
| GGT                        | 0.023                 | 0.005         | 5.035    | <b>5.02E-07</b> |
| DBIL                       | -0.387                | 0.095         | -4.074   | <b>4.73E-05</b> |
| BMI                        | 0.046                 | 0.012         | 3.887    | <b>1.04E-04</b> |
| TBIL                       | 0.115                 | 0.033         | 3.477    | <b>5.14E-04</b> |
| AST                        | -0.029                | 0.009         | -3.036   | 2.41E-03        |
| ALT                        | 0.014                 | 0.005         | 2.727    | 6.43E-03        |
| FTP                        | -0.096                | 0.075         | -1.277   | 2.02E-01        |
| HGB                        | 0.008                 | 0.009         | 0.902    | 3.67E-01        |
| PLT                        | 0.004                 | 0.005         | 0.872    | 3.83E-01        |
| HTN                        | 0.247                 | 0.316         | 0.780    | 4.35E-01        |
| PCT                        | -3.295                | 4.788         | -0.688   | 4.91E-01        |
| MPV                        | 0.186                 | 0.294         | 0.633    | 5.27E-01        |
| ALP                        | -0.002                | 0.004         | -0.615   | 5.39E-01        |
| NEU                        | 0.053                 | 0.131         | 0.403    | 6.87E-01        |
| P-LCR                      | -0.013                | 0.035         | -0.375   | 7.07E-01        |
| WBC                        | -0.033                | 0.125         | -0.266   | 7.90E-01        |
| LYM                        | -0.015                | 0.165         | -0.089   | 9.29E-01        |
| HCT                        | 0.002                 | 0.031         | 0.059    | 9.53E-01        |
| RBC                        | 0.007                 | 0.159         | 0.047    | 9.63E-01        |

*Notes:* HTN, FTP, Age and BMI are abbreviations for hypertension, first-time pregnancy, maternal age and body mass index, respectively. The full names of other abbreviations are provided in [Table S1](#).

Table S4. Correlation tests between GDM traits and clinical diagnosis, related to Table 1

| Traits info                                 | n(%)         |              |                | GDM status  |                 | GDM AUC |                 |
|---------------------------------------------|--------------|--------------|----------------|-------------|-----------------|---------|-----------------|
|                                             | Name         | All samples  | In GDM control | In GDM case | OR              | Pvalue  | T               |
| Pregnancy with uterine scar, n(%)           | 1844(11.34%) | 1583(10.98%) | 261(14.22%)    | 1.344       | <b>4.50E-05</b> | 6.883   | <b>6.08E-12</b> |
| Premature rupture of membranes, n(%)        | 2469(15.19%) | 2266(15.72%) | 203(11.06%)    | 0.667       | <b>1.95E-07</b> | -3.211  | <b>1.33E-03</b> |
| Intrauterine distress, n(%)                 | 1419(8.73%)  | 1306(9.06%)  | 113(6.15%)     | 0.658       | <b>4.02E-05</b> | -4.023  | <b>5.77E-05</b> |
| Threatened preterm birth, n(%)              | 404(2.49%)   | 348(2.41%)   | 56(3.05%)      | 1.272       | 1.16E-01        | 2.516   | 1.19E-02        |
| Threatened abortion, n(%)                   | 319(1.96%)   | 278(1.93%)   | 41(2.23%)      | 1.162       | 4.25E-01        | 2.256   | 2.41E-02        |
| Eclampsia, n(%)                             | 220(1.35%)   | 182(1.26%)   | 38(2.07%)      | 1.653       | 6.67E-03        | 5.272   | <b>1.37E-07</b> |
| Gestational hypertension, n(%)              | 224(1.38%)   | 198(1.37%)   | 26(1.42%)      | 1.032       | 9.66E-01        | 3.795   | <b>1.48E-04</b> |
| Ineffective uterine contractions, n(%)      | 287(1.77%)   | 266(1.84%)   | 21(1.14%)      | 0.616       | 4.00E-02        | 0.583   | 5.60E-01        |
| Oligohydramnios, n(%)                       | 371(2.28%)   | 346(2.40%)   | 25(1.36%)      | 0.561       | 6.49E-03        | -2.156  | 3.11E-02        |
| Nuchal cord, n(%)                           | 773(4.76%)   | 758(5.26%)   | 15(0.82%)      | 0.148       | <b>6.22E-17</b> | -6.399  | <b>1.61E-10</b> |
| Intrahepatic cholestasis of pregnancy, n(%) | 112(0.69%)   | 98(0.68%)    | 14(0.76%)      | 1.123       | 7.99E-01        | -0.631  | 5.28E-01        |
| Pregnancy with vomiting, n(%)               | 132(0.81%)   | 120(0.83%)   | 12(0.65%)      | 0.784       | 5.06E-01        | -3.924  | <b>8.75E-05</b> |
| Pregnancy with uterine fibroids, n(%)       | 96(0.59%)    | 83(0.58%)    | 13(0.71%)      | 1.232       | 5.92E-01        | 1.282   | 2.00E-01        |
| fetal abnormalities, n(%)                   | 122(0.75%)   | 110(0.76%)   | 12(0.65%)      | 0.856       | 7.13E-01        | -0.969  | 3.32E-01        |
| Cervical polyps, n(%)                       | 68(0.42%)    | 56(0.39%)    | 12(0.65%)      | 1.687       | 1.43E-01        | 1.061   | 2.89E-01        |

Table S5. Identified associated loci from GWAS, related to Figures 1-2

| Trait   | Locus INFO |       |           |           |        |           | Top SNP INFO                 |           |            |            |          |              |       |
|---------|------------|-------|-----------|-----------|--------|-----------|------------------------------|-----------|------------|------------|----------|--------------|-------|
|         | name       | chrom | start     | end       | width  | snp_count | locus_gene                   | pos       | SNP        | gene       | pvalue   | beta/log(OR) | se    |
| GDM     |            | 6     | 20623948  | 20724019  | 100072 | 54        | CDKAL1                       | 20675561  | rs35261542 | CDKAL1     | 3.88E-12 | 0.306        | 0.044 |
| GDM     |            | 11    | 92980604  | 92980604  | 1      | 1         | MTNR1B                       | 92980604  | rs3781637  | MTNR1B     | 3.29E-09 | -0.676       | 0.114 |
| GDM_AUC |            | 6     | 20614483  | 20829886  | 215404 | 76        | CDKAL1                       | 20680447  | rs9348441  | CDKAL1     | 1.40E-30 | 0.155        | 0.013 |
| GDM_AUC |            | 7     | 128203335 | 128217273 | 13939  | 13        | MIR129-1                     | 128212012 | rs11981584 | <MIR129-1  | 2.74E-10 | 0.284        | 0.045 |
| GDM_AUC |            | 9     | 4291435   | 4307369   | 15935  | 3         | RNU6-694P                    | 4307369   | rs79321323 | RNU6-694P> | 2.41E-12 | 0.262        | 0.037 |
| GDM_AUC |            | 10    | 92492827  | 92664301  | 171475 | 12        | IDE, KIF11, EIF2S2P3         | 92627577  | rs1573051  | KIF11      | 8.97E-11 | 0.090        | 0.014 |
| GDM_AUC |            | 11    | 92934966  | 92994860  | 59895  | 11        | SNRPGP16, MTNR1B             | 92980604  | rs3781637  | MTNR1B     | 2.09E-31 | -0.378       | 0.032 |
| 0hGlu   |            | 2     | 168797218 | 168956919 | 159702 | 3         | NOSTRIN, ABCB11              | 168797218 | rs12612019 | NOSTRIN>   | 1.05E-08 | -0.707       | 0.123 |
| 0hGlu   |            | 5     | 96379021  | 96428986  | 49966  | 9         | PCSK1                        | 96383972  | rs10213823 | PCSK1>     | 3.72E-11 | -0.091       | 0.014 |
| 0hGlu   |            | 6     | 20664850  | 20713683  | 48834  | 11        | CDKAL1                       | 20680447  | rs9348441  | CDKAL1     | 1.57E-09 | 0.083        | 0.014 |
| 0hGlu   |            | 6     | 152026723 | 152047623 | 20901  | 15        | ESR1                         | 152036096 | rs3020430  | ESR1       | 1.36E-08 | 0.074        | 0.013 |
| 0hGlu   |            | 7     | 44078957  | 44137627  | 58671  | 8         | POLM, POLD2, RNA5SP230, MYL7 | 44124463  | rs3217944  | <POLD2     | 3.57E-13 | -0.116       | 0.016 |
| 0hGlu   |            | 9     | 627420    | 679916    | 52497  | 23        | KANK1                        | 655864    | rs75885458 | KANK1      | 4.78E-09 | 0.171        | 0.029 |
| 0hGlu   |            | 9     | 4291435   | 4291435   | 1      | 1         | RNU6-694P                    | 4291435   | rs57132962 | RNU6-694P> | 1.07E-09 | 0.306        | 0.050 |
| 0hGlu   |            | 11    | 92948256  | 92994860  | 46605  | 5         | SNRPGP16, MTNR1B             | 92980604  | rs3781637  | MTNR1B     | 9.10E-16 | -0.264       | 0.033 |
| 0hGlu   |            | 20    | 22540023  | 22625059  | 85037  | 48        | LINC00261, FOXA2, LNCNEF     | 22580744  | rs6048206  | FOXA2>     | 2.34E-11 | -0.122       | 0.018 |
| 1hGlu   |            | 6     | 20620906  | 20724019  | 103114 | 58        | CDKAL1                       | 20675561  | rs35261542 | CDKAL1     | 7.41E-25 | 0.139        | 0.014 |
| 1hGlu   |            | 7     | 128205603 | 128212012 | 6410   | 7         | MIR129-1                     | 128212012 | rs11981584 | <MIR129-1  | 5.58E-09 | 0.264        | 0.045 |
| 1hGlu   |            | 9     | 4307369   | 4307369   | 1      | 1         | RNU6-694P                    | 4307369   | rs79321323 | RNU6-694P> | 9.89E-09 | 0.215        | 0.037 |
| 1hGlu   |            | 10    | 92492827  | 92664301  | 171475 | 12        | IDE, KIF11, EIF2S2P3         | 92627577  | rs1573051  | KIF11      | 1.50E-10 | 0.090        | 0.014 |
| 1hGlu   |            | 11    | 92936503  | 92994860  | 58358  | 10        | SNRPGP16, MTNR1B             | 92980604  | rs3781637  | MTNR1B     | 5.09E-27 | -0.351       | 0.033 |
| 2hGlu   |            | 6     | 20620906  | 20829886  | 208981 | 63        | CDKAL1                       | 20680447  | rs9348441  | CDKAL1     | 4.61E-25 | 0.140        | 0.014 |
| 2hGlu   |            | 9     | 4291435   | 4307369   | 15935  | 3         | RNU6-694P                    | 4291435   | rs57132962 | RNU6-694P> | 7.22E-13 | 0.357        | 0.050 |
| 2hGlu   |            | 10    | 69215297  | 69215297  | 1      | 1         | HKDC1                        | 69215297  | rs58433451 | HKDC1>     | 6.64E-09 | -0.638       | 0.110 |
| 2hGlu   |            | 11    | 92948256  | 92994245  | 45990  | 5         | SNRPGP16, MTNR1B             | 92980604  | rs3781637  | MTNR1B     | 5.31E-18 | -0.281       | 0.032 |

**Table S6. The summary of GDM associated SNP, related to Figure 2**

| <b>SNP</b>                     | <b>rs35261542</b> | <b>rs3781637</b> | <b>rs7754840</b> | <b>rs9348441</b> | <b>rs10830962</b>  | <b>rs10830963</b>  |
|--------------------------------|-------------------|------------------|------------------|------------------|--------------------|--------------------|
| <b>Chr</b>                     | 6                 | 11               | 6                | 6                | 11                 | 11                 |
| <b>Pos</b>                     | 20675561          | 92980604         | 20661019         | 20680447         | 92965261           | 92975544           |
| <b>Gene</b>                    | <i>CDKALI</i>     | <i>MTNR1B</i>    | <i>CDKALI</i>    | <i>CDKALI</i>    | <i>MTNR1B</i>      | <i>MTNR1B</i>      |
| <b>A1</b>                      | A                 | C                | C                | A                | G                  | G                  |
| <b>A1 freq</b>                 | 0.3729            | 0.1409           | 0.3875           | 0.3606           | 0.4322             | 0.4207             |
| <b>Freq EAS</b>                | 0.3859            | 0.1349           | 0.4008           | 0.3869           | 0.4296             | 0.4226             |
| <b>Freq EUR</b>                | 0.2793            | 0.0089           | 0.3181           | 0.2783           | 0.4125             | 0.2883             |
| <b>pv in GDM status</b>        | 3.88E-12          | 3.29E-09         | 4.90E-11         | 4.00E-12         | NA                 | NA                 |
| <b>pv in GDM<sub>AUC</sub></b> | 1.97E-30          | 2.09E-31         | 3.22E-27         | 1.40E-30         | NA                 | NA                 |
| <b>pv in GCST90239750</b>      | 2.36E-14          | 2.97E-01         | 1.51E-11         | 1.57E-14         | 3.01E-37           | 4.30E-54           |
| <b>HWE</b>                     | 1.33E-02          | 8.31E-02         | 1.59E-03         | 4.24E-01         | 0.00E+00           | 0.00E+00           |
| <b>Note</b>                    |                   |                  |                  |                  | removed due to HWE | removed due to HWE |

*Notes* : A1 freq indicates the allele frequency of A1 allele, and HWE indicates hardy-Weinberg equilibrium p-value for each SNP. The Freq EAS and Freq EUR are allele frequencies in EAS and EUR population, respectively, obtained from 1000 genomes project phase 3.

Table S7. Detailed information of studies downloaded from the GWAS catalog, related to Figures 5-6

| Index | GWAS catalog study ID | Trait name                          | Journal       | Title                                                                                                                                                                        | Population                                                                                                                               | Publication date | URL                                                                                                                                                                                                               |
|-------|-----------------------|-------------------------------------|---------------|------------------------------------------------------------------------------------------------------------------------------------------------------------------------------|------------------------------------------------------------------------------------------------------------------------------------------|------------------|-------------------------------------------------------------------------------------------------------------------------------------------------------------------------------------------------------------------|
| 1     | GCST90018959          | Height                              | Nat Genet     | A cross-population atlas of genetic associations for 220 human phenotypes. <sup>1</sup>                                                                                      | 360,388 European ancestry individuals, 165,056 East Asian ancestry individuals                                                           | 2021/9/30        | <a href="http://ftp.ebi.ac.uk/pub/databases/gwas/summary_statistics/GCST90018001-GCST90019000/GCST90018959">http://ftp.ebi.ac.uk/pub/databases/gwas/summary_statistics/GCST90018001-GCST90019000/GCST90018959</a> |
| 2     | GCST90018949          | Weight                              | Nat Genet     | A cross-population atlas of genetic associations for 220 human phenotypes. <sup>1</sup>                                                                                      | 360,116 European ancestry individuals, 165,419 East Asian ancestry individuals                                                           | 2021/9/30        | <a href="http://ftp.ebi.ac.uk/pub/databases/gwas/summary_statistics/GCST90018001-GCST90019000/GCST90018949">http://ftp.ebi.ac.uk/pub/databases/gwas/summary_statistics/GCST90018001-GCST90019000/GCST90018949</a> |
| 3     | GCST90000025          | Appendicular lean mass              | Commun Biol   | The genetic architecture of appendicular lean mass characterized by association analysis in the UK Biobank study. <sup>2</sup>                                               | 450243 European                                                                                                                          | 2020/10/23       | <a href="http://ftp.ebi.ac.uk/pub/databases/gwas/summary_statistics/GCST90000001-GCST90001000/GCST90000025">http://ftp.ebi.ac.uk/pub/databases/gwas/summary_statistics/GCST90000001-GCST90001000/GCST90000025</a> |
| 4     | GCST90020028          | Hip circumference adjusted for BMI  | Sci Rep       | GWAS of allometric body-shape indices in UK Biobank identifies loci suggesting associations with morphogenesis, organogenesis, adrenal cell renewal and cancer. <sup>3</sup> | 219872 European                                                                                                                          | 2021/5/21        | <a href="http://ftp.ebi.ac.uk/pub/databases/gwas/summary_statistics/GCST90020001-GCST90021000/GCST90020028">http://ftp.ebi.ac.uk/pub/databases/gwas/summary_statistics/GCST90020001-GCST90021000/GCST90020028</a> |
| 5     | GCST006979            | Heel bone mineral density           | Nat Genet     | An atlas of genetic influences on osteoporosis in humans and mice. <sup>4</sup>                                                                                              | 426824 European                                                                                                                          | 2018/12/31       | <a href="http://ftp.ebi.ac.uk/pub/databases/gwas/summary_statistics/GCST006001-GCST007000/GCST006979">http://ftp.ebi.ac.uk/pub/databases/gwas/summary_statistics/GCST006001-GCST007000/GCST006979</a>             |
| 6     | GCST006655            | Breast size                         | Sci Rep       | Japanese GWAS identifies variants for bust-size, dysmenorrhea, and menstrual fever that are eQTLs for relevant protein-coding or long non-coding RNAs. <sup>5</sup>          | 5,609 Japanese ancestry female individuals                                                                                               | 2018/5/31        | <a href="http://ftp.ebi.ac.uk/pub/databases/gwas/summary_statistics/GCST006001-GCST007000/GCST006655">http://ftp.ebi.ac.uk/pub/databases/gwas/summary_statistics/GCST006001-GCST007000/GCST006655</a>             |
| 7     | GCST90018972          | Systolic blood pressure             | Nat Genet     | A cross-population atlas of genetic associations for 220 human phenotypes. <sup>1</sup>                                                                                      | 340,159 European ancestry individuals, 145,505 East Asian ancestry individuals                                                           | 2021/9/30        | <a href="http://ftp.ebi.ac.uk/pub/databases/gwas/summary_statistics/GCST90018001-GCST90019000/GCST90018972">http://ftp.ebi.ac.uk/pub/databases/gwas/summary_statistics/GCST90018001-GCST90019000/GCST90018972</a> |
| 8     | GCST90018952          | Diastolic blood pressure            | Nat Genet     | A cross-population atlas of genetic associations for 220 human phenotypes. <sup>1</sup>                                                                                      | 340,162 European ancestry individuals, 145,515 East Asian ancestry individuals                                                           | 2021/9/30        | <a href="http://ftp.ebi.ac.uk/pub/databases/gwas/summary_statistics/GCST90018001-GCST90019000/GCST90018952">http://ftp.ebi.ac.uk/pub/databases/gwas/summary_statistics/GCST90018001-GCST90019000/GCST90018952</a> |
| 9     | GCST90018970          | Pulse pressure                      | Nat Genet     | A cross-population atlas of genetic associations for 220 human phenotypes. <sup>1</sup>                                                                                      | 360,863 European ancestry individuals, 145,445 East Asian ancestry individuals                                                           | 2021/9/30        | <a href="http://ftp.ebi.ac.uk/pub/databases/gwas/summary_statistics/GCST90018001-GCST90019000/GCST90018970">http://ftp.ebi.ac.uk/pub/databases/gwas/summary_statistics/GCST90018001-GCST90019000/GCST90018970</a> |
| 10    | GCST90019516          | Serum phosphate levels              | Nat Genet     | Genetics of 35 blood and urine biomarkers in the UK Biobank. <sup>6</sup>                                                                                                    | 312888 European, 5568 African unspecified, 6685 South Asian                                                                              | 2021/1/18        | <a href="http://ftp.ebi.ac.uk/pub/databases/gwas/summary_statistics/GCST90019001-GCST90020000/GCST90019516">http://ftp.ebi.ac.uk/pub/databases/gwas/summary_statistics/GCST90019001-GCST90020000/GCST90019516</a> |
| 11    | GCST90018976          | Serum total protein level           | Nat Genet     | A cross-population atlas of genetic associations for 220 human phenotypes. <sup>1</sup>                                                                                      | 314,921 European ancestry individuals, 133,321 East Asian ancestry individuals                                                           | 2021/9/30        | <a href="http://ftp.ebi.ac.uk/pub/databases/gwas/summary_statistics/GCST90018001-GCST90019000/GCST90018976">http://ftp.ebi.ac.uk/pub/databases/gwas/summary_statistics/GCST90018001-GCST90019000/GCST90018976</a> |
| 12    | GCST90019511          | Insulin-like growth factor 1 levels | Nat Genet     | Genetics of 35 blood and urine biomarkers in the UK Biobank. <sup>6</sup>                                                                                                    | 340,567 European ancestry individuals, 5,974 African ancestry individuals, 7,283 South Asian ancestry individuals                        | 2021/1/18        | <a href="http://ftp.ebi.ac.uk/pub/databases/gwas/summary_statistics/GCST90019001-GCST90020000/GCST90019511">http://ftp.ebi.ac.uk/pub/databases/gwas/summary_statistics/GCST90019001-GCST90020000/GCST90019511</a> |
| 13    | GCST90018799          | Breast cancer                       | Nat Genet     | A cross-population atlas of genetic associations for 220 human phenotypes. <sup>1</sup>                                                                                      | 17,389 European ancestry cases, 240,341 European ancestry controls, 6,325 East Asian ancestry cases, 73,225 East Asian ancestry controls | 2021/9/30        | <a href="http://ftp.ebi.ac.uk/pub/databases/gwas/summary_statistics/GCST90018001-GCST90019000/GCST90018799">http://ftp.ebi.ac.uk/pub/databases/gwas/summary_statistics/GCST90018001-GCST90019000/GCST90018799</a> |
| 14    | GCST90000047          | Age at first sexual intercourse     | Nat Hum Behav | Identification of 371 genetic variants for age at first sex and birth linked to externalising behaviour. <sup>7</sup>                                                        | 397338 European                                                                                                                          | 2021/7/1         | <a href="http://ftp.ebi.ac.uk/pub/databases/gwas/summary_statistics/GCST90000001-GCST90001000/GCST90000047">http://ftp.ebi.ac.uk/pub/databases/gwas/summary_statistics/GCST90000001-GCST90001000/GCST90000047</a> |
| 15    | GCST90011804          | Breast cancer                       | Nat Commun    | Pan-cancer study detects genetic risk variants and shared genetic basis in two large cohorts. <sup>8</sup>                                                                   | 428231 European                                                                                                                          | 2020/9/4         | <a href="http://ftp.ebi.ac.uk/pub/databases/gwas/summary_statistics/GCST90011001-GCST90012000/GCST90011804">http://ftp.ebi.ac.uk/pub/databases/gwas/summary_statistics/GCST90011001-GCST90012000/GCST90011804</a> |

**Table S8. Genetic correlation between glycemc traits and ESR1-associated traits, related to Figure 5**

| Traits info           |                                     | 0hGlu  |         |        |                 | GDM status |         |        |          | GDM AUC |         |        |          |
|-----------------------|-------------------------------------|--------|---------|--------|-----------------|------------|---------|--------|----------|---------|---------|--------|----------|
| GWAS catalog study ID | Traits name                         | Rg     | Stderr. | Zscore | Pvalue          | Rg         | Stderr. | Zscore | Pvalue   | Rg      | Stderr. | Zscore | Pvalue   |
| GCST90018952          | Diastolic blood pressure            | 0.259  | 0.080   | 3.219  | <b>1.30E-03</b> | 0.483      | 0.377   | 1.280  | 2.01E-01 | 0.190   | 0.070   | 2.734  | 6.30E-03 |
| GCST90018972          | Systolic blood pressure             | 0.244  | 0.069   | 3.512  | <b>4.00E-04</b> | 0.358      | 0.289   | 1.236  | 2.17E-01 | 0.185   | 0.070   | 2.662  | 7.80E-03 |
| GCST90018949          | Weight                              | 0.169  | 0.060   | 2.810  | 5.00E-03        | 0.202      | 0.187   | 1.082  | 2.80E-01 | 0.037   | 0.062   | 0.598  | 5.50E-01 |
| GCST006979            | Heel bone mineral density           | 0.069  | 0.058   | 1.194  | 2.33E-01        | 0.164      | 0.200   | 0.817  | 4.14E-01 | 0.044   | 0.058   | 0.754  | 4.51E-01 |
| GCST90000047          | Age at first sexual intercourse     | -0.062 | 0.061   | -1.012 | 3.12E-01        | -0.121     | 0.154   | -0.786 | 4.32E-01 | -0.029  | 0.052   | -0.553 | 5.80E-01 |
| GCST90019516          | Serum phosphate levels              | -0.455 | 0.282   | -1.613 | 1.07E-01        | -0.240     | 0.307   | -0.781 | 4.35E-01 | -0.012  | 0.127   | -0.091 | 9.27E-01 |
| GCST90018970          | Pulse pressure                      | 0.129  | 0.064   | 2.005  | 4.50E-02        | 0.098      | 0.156   | 0.626  | 5.31E-01 | 0.110   | 0.070   | 1.565  | 1.18E-01 |
| GCST90018976          | Serum total protein level           | -0.032 | 0.080   | -0.393 | 6.94E-01        | -0.108     | 0.174   | -0.619 | 5.36E-01 | 0.026   | 0.075   | 0.344  | 7.31E-01 |
| GCST90019511          | Insulin-like growth factor 1 levels | -0.120 | 0.072   | -1.662 | 9.66E-02        | -0.116     | 0.217   | -0.533 | 5.94E-01 | -0.022  | 0.071   | -0.308 | 7.58E-01 |
| GCST90000025          | Appendicular lean mass              | 0.038  | 0.054   | 0.704  | 4.82E-01        | -0.056     | 0.116   | -0.482 | 6.30E-01 | -0.023  | 0.056   | -0.415 | 6.78E-01 |
| GCST90018959          | Height                              | 0.041  | 0.057   | 0.717  | 4.73E-01        | 0.038      | 0.116   | 0.325  | 7.45E-01 | -0.030  | 0.057   | -0.536 | 5.92E-01 |
| GCST90020028          | Hip circumference adjusted for BMI  | -0.025 | 0.067   | -0.367 | 7.14E-01        | -0.038     | 0.154   | -0.245 | 8.06E-01 | -0.062  | 0.068   | -0.916 | 3.60E-01 |
| GCST006655            | Breast size                         | -0.365 | 0.380   | -0.963 | 3.36E-01        | -0.059     | 0.465   | -0.128 | 8.98E-01 | 0.223   | 0.319   | 0.699  | 4.84E-01 |
| GCST90018799          | Breast cancer                       | -0.055 | 0.130   | -0.421 | 6.74E-01        | -0.031     | 0.257   | -0.120 | 9.05E-01 | -0.132  | 0.129   | -1.023 | 3.06E-01 |



Table S9. Mendelian randomization of ESRI-associated traits on glycemic traits, related to Figure 6

| Exposure info         |                                    | Outcome: 0hGlu |         |        |       |                 |              | Outcome: GDM status |         |        |       |          | Outcome: GDM AUC |          |         |        |        |                 |                |
|-----------------------|------------------------------------|----------------|---------|--------|-------|-----------------|--------------|---------------------|---------|--------|-------|----------|------------------|----------|---------|--------|--------|-----------------|----------------|
| GWAS catalog study ID | Traits name                        | Estimate       | Stderr. | Zvalue | OR    | Pvalue          | (95% CI)     | Estimate            | Stderr. | Zvalue | OR    | Pvalue   | (95% CI)         | Estimate | Stderr. | Zvalue | OR     | Pvalue          | (95% CI)       |
| GCST006979            | Heel bone mineral density          | 0.076          | 0.227   | 0.334  | 1.079 | 7.38E-01        | (0.69, 1.68) | 0.206               | 1.640   | 0.125  | 1.228 | 9.00E-01 | (0.05, 30.60)    | 0.090    | 1.142   | 0.079  | 1.094  | 9.37E-01        | (0.12, 10.26)  |
| GCST90000025          | Appendicular lean mass             | -0.747         | 0.259   | -2.886 | 0.474 | <b>3.91E-03</b> | (0.29, 0.79) | -3.878              | 1.875   | -2.069 | 0.021 | 3.86E-02 | (0.00, 0.82)     | -3.123   | 1.302   | -2.400 | 0.044  | 1.64E-02        | (0.00, 0.56)   |
| GCST90000047          | Age at first sexual intercourse    | -0.004         | 0.037   | -0.095 | 0.996 | 9.24E-01        | (0.93, 1.07) | -0.014              | 0.270   | -0.051 | 0.986 | 9.59E-01 | (0.58, 1.67)     | -0.091   | 0.188   | -0.485 | 0.913  | 6.28E-01        | (0.63, 1.32)   |
| GCST90011804          | Breast cancer                      | -0.131         | 0.117   | -1.118 | 0.877 | 2.64E-01        | (0.70, 1.10) | -0.719              | 0.777   | -0.925 | 0.487 | 3.55E-01 | (0.11, 2.24)     | -0.935   | 0.540   | -1.730 | 0.393  | 8.36E-02        | (0.14, 1.13)   |
| GCST90019516          | Serum phosphate levels             | 0.422          | 0.144   | 2.930  | 1.525 | <b>3.40E-03</b> | (1.15, 2.02) | 0.402               | 1.038   | 0.387  | 1.495 | 6.99E-01 | (0.20, 11.44)    | 0.111    | 0.724   | 0.153  | 1.117  | 8.79E-01        | (0.27, 4.62)   |
| GCST90020028          | Hip circumference adjusted for BMI | -0.043         | 0.022   | -1.997 | 0.958 | 4.59E-02        | (0.92, 1.00) | 0.130               | 0.155   | 0.835  | 1.138 | 4.03E-01 | (0.84, 1.54)     | -0.069   | 0.108   | -0.632 | 0.934  | 5.27E-01        | (0.75, 1.15)   |
| GCST90018959          | Height                             | 0.437          | 0.196   | 2.224  | 1.548 | 2.61E-02        | (1.05, 2.28) | 1.598               | 1.714   | 0.933  | 4.943 | 3.51E-01 | (0.17, 142.15)   | 3.366    | 1.185   | 2.840  | 28.963 | <b>4.51E-03</b> | (2.84, 295.49) |
| GCST90018970          | Pulse pressure                     | 0.409          | 0.111   | 3.703  | 1.506 | <b>2.14E-04</b> | (1.21, 1.87) | 0.499               | 0.970   | 0.515  | 1.647 | 6.07E-01 | (0.25, 11.03)    | 1.740    | 0.670   | 2.597  | 5.700  | 9.41E-03        | (1.53, 21.20)  |

**Table S10. Transcriptome-wide association study for glycemic traits, related to STAR Methods**

| Tissue info                |                                         | 0hGlu           |         |                 | GDM status      |         |          | GDM AUC  |         |                 |          |
|----------------------------|-----------------------------------------|-----------------|---------|-----------------|-----------------|---------|----------|----------|---------|-----------------|----------|
| Category                   | Tissue                                  | Beta            | Stderr. | Pvalue          | Beta            | Stderr. | Pvalue   | Beta     | Stderr. | Pvalue          |          |
| Adipose                    | Adipose Subcutaneous                    | 5.594           | 2.950   | 5.80E-02        | 11.784          | 21.243  | 5.79E-01 | -11.120  | 14.835  | 4.54E-01        |          |
|                            | Adipose Visceral (Omentum)              | -2.922          | 0.739   | <b>7.77E-05</b> | -14.039         | 5.319   | 8.31E-03 | -8.498   | 3.720   | 2.24E-02        |          |
| Blood/Immune               | Cells EBV-transformed lymphocytes       | 0.851           | 0.252   | <b>7.48E-04</b> | 4.321           | 1.816   | 1.73E-02 | 2.335    | 1.270   | 6.59E-02        |          |
|                            | Spleen                                  | 0.089           | 0.918   | 9.23E-01        | -2.579          | 6.655   | 6.98E-01 | -7.382   | 4.619   | 1.10E-01        |          |
|                            | Whole Blood                             | -28.945         | 15.127  | 5.57E-02        | -61.981         | 108.560 | 5.68E-01 | -53.266  | 76.046  | 4.84E-01        |          |
| CNS                        | Brain Amygdala                          | 5.180           | 1.720   | 2.60E-03        | 24.459          | 12.324  | 4.72E-02 | 11.483   | 8.646   | 1.84E-01        |          |
|                            | Brain Anterior cingulate cortex (BA24)  | -1.414          | 0.412   | <b>5.95E-04</b> | -6.762          | 2.958   | 2.23E-02 | -3.831   | 2.071   | 6.43E-02        |          |
|                            | Brain Caudate (basal ganglia)           | -4.321          | 1.380   | 1.74E-03        | -18.077         | 10.047  | 7.20E-02 | -19.259  | 6.942   | 5.54E-03        |          |
|                            | Brain Cerebellar Hemisphere             | -0.065          | 1.032   | 9.50E-01        | -5.569          | 7.425   | 4.53E-01 | 0.849    | 5.186   | 8.70E-01        |          |
|                            | Brain Cerebellum                        | -2.715          | 0.666   | <b>4.57E-05</b> | -12.835         | 4.799   | 7.48E-03 | -9.493   | 3.350   | 4.61E-03        |          |
|                            | Brain Cortex                            | 1.688           | 1.579   | 2.85E-01        | 3.383           | 11.420  | 7.67E-01 | 16.232   | 7.942   | 4.10E-02        |          |
|                            | Brain Frontal Cortex (BA9)              | 0.496           | 0.449   | 2.69E-01        | 0.035           | 3.241   | 9.91E-01 | 0.302    | 2.257   | 8.94E-01        |          |
|                            | Brain Hippocampus                       | -12.308         | 9.696   | 2.04E-01        | 63.231          | 69.789  | 3.65E-01 | -13.170  | 48.767  | 7.87E-01        |          |
|                            | Brain Hypothalamus                      | -2.257          | 0.640   | <b>4.22E-04</b> | -4.449          | 4.601   | 3.34E-01 | -4.158   | 3.220   | 1.97E-01        |          |
|                            | Brain Nucleus accumbens (basal ganglia) | -2.137          | 0.408   | <b>1.69E-07</b> | -6.178          | 2.919   | 3.43E-02 | -6.236   | 2.056   | 2.43E-03        |          |
|                            | Brain Putamen (basal ganglia)           | -3.997          | 1.587   | 1.18E-02        | -18.198         | 11.534  | 1.15E-01 | -9.970   | 7.985   | 2.12E-01        |          |
|                            | Brain Spinal cord (cervical c-1)        | 0.318           | 0.218   | 1.45E-01        | 1.960           | 1.576   | 2.14E-01 | 1.764    | 1.099   | 1.09E-01        |          |
|                            | Brain Substantia nigra                  | -5.209          | 1.684   | 1.99E-03        | -27.008         | 12.140  | 2.61E-02 | -13.290  | 8.475   | 1.17E-01        |          |
|                            | Cardiovascular                          | Artery Aorta    | 3.261   | 1.522           | 3.22E-02        | 10.779  | 11.085   | 3.31E-01 | 21.671  | 7.660           | 4.67E-03 |
|                            |                                         | Artery Coronary | -5.648  | 1.605           | <b>4.34E-04</b> | -26.222 | 11.520   | 2.28E-02 | -12.912 | 8.073           | 1.10E-01 |
| Artery Tibial              |                                         | 4.367           | 0.858   | <b>3.61E-07</b> | 13.848          | 6.157   | 2.45E-02 | 16.170   | 4.318   | <b>1.81E-04</b> |          |
| Heart Atrial Appendage     |                                         | 1.106           | 1.711   | 5.18E-01        | -6.927          | 12.338  | 5.75E-01 | 7.991    | 8.596   | 3.53E-01        |          |
| Heart Left Ventricle       |                                         | -1.919          | 0.803   | 1.68E-02        | -3.601          | 5.781   | 5.33E-01 | -0.204   | 4.041   | 9.60E-01        |          |
| Colon Sigmoid              |                                         | -3.848          | 3.696   | 2.98E-01        | -30.791         | 26.708  | 2.49E-01 | -14.250  | 18.585  | 4.43E-01        |          |
| Digestive                  | Colon Transverse                        | -3.170          | 0.908   | <b>4.86E-04</b> | -16.483         | 6.535   | 1.17E-02 | -8.894   | 4.570   | 5.17E-02        |          |
|                            | Esophagus Gastroesophageal Junction     | 18.303          | 6.506   | 4.91E-03        | 80.647          | 46.713  | 8.43E-02 | 31.393   | 32.730  | 3.37E-01        |          |
|                            | Esophagus Mucosa                        | 5.802           | 2.101   | 5.75E-03        | 32.588          | 15.131  | 3.13E-02 | 20.353   | 10.566  | 5.41E-02        |          |
|                            | Esophagus Muscularis                    | 1.008           | 1.311   | 4.42E-01        | -0.880          | 9.480   | 9.26E-01 | -7.531   | 6.598   | 2.54E-01        |          |
|                            | Small Intestine Terminal Ileum          | 5.524           | 1.615   | <b>6.26E-04</b> | 25.208          | 11.580  | 2.95E-02 | 11.449   | 8.124   | 1.59E-01        |          |
|                            | Stomach                                 | 6.243           | 2.339   | 7.61E-03        | 31.010          | 16.714  | 6.35E-02 | 16.135   | 11.754  | 1.70E-01        |          |
|                            | Adrenal Gland                           | 8.190           | 3.202   | 1.05E-02        | 37.301          | 22.863  | 1.03E-01 | 22.234   | 16.093  | 1.67E-01        |          |
| Endocrine                  | Pancreas                                | -2.558          | 1.479   | 8.38E-02        | -17.109         | 10.611  | 1.07E-01 | -7.161   | 7.434   | 3.35E-01        |          |
|                            | Pituitary                               | 12.214          | 2.518   | <b>1.24E-06</b> | 44.345          | 18.084  | 1.42E-02 | 37.282   | 12.682  | 3.29E-03        |          |
|                            | Thyroid                                 | 2.616           | 0.865   | 2.50E-03        | 11.291          | 6.244   | 7.06E-02 | 10.724   | 4.353   | 1.38E-02        |          |
|                            | Liver                                   | -7.394          | 4.853   | 1.28E-01        | -54.706         | 34.872  | 1.17E-01 | -22.213  | 24.392  | 3.62E-01        |          |
| Musculoskeletal/connective | Muscle Skeletal                         | -10.001         | 3.362   | 2.94E-03        | -37.286         | 24.057  | 1.21E-01 | -23.627  | 16.902  | 1.62E-01        |          |
| Reproductive               | Ovary                                   | -20.964         | 5.951   | <b>4.28E-04</b> | -76.249         | 42.746  | 7.45E-02 | -47.004  | 29.927  | 1.16E-01        |          |
|                            | Prostate                                | -3.601          | 0.740   | <b>1.15E-06</b> | -9.072          | 5.291   | 8.64E-02 | -10.074  | 3.723   | 6.82E-03        |          |
|                            | Testis                                  | -3.334          | 2.109   | 1.14E-01        | -18.805         | 15.407  | 2.22E-01 | -26.571  | 10.610  | 1.23E-02        |          |
|                            | Uterus                                  | 0.290           | 0.219   | 1.84E-01        | 2.592           | 1.575   | 9.99E-02 | 0.858    | 1.099   | 4.35E-01        |          |
|                            | Vagina                                  | -0.498          | 0.150   | <b>9.18E-04</b> | -2.448          | 1.081   | 2.35E-02 | -1.328   | 0.755   | 7.88E-02        |          |
|                            | Breast Mammary Tissue                   | -8.010          | 3.230   | 1.32E-02        | -50.069         | 23.264  | 3.14E-02 | -19.646  | 16.245  | 2.27E-01        |          |

Other

|                                   |         |       |                 |         |        |          |         |        |                 |
|-----------------------------------|---------|-------|-----------------|---------|--------|----------|---------|--------|-----------------|
| Cells Transformed fibroblasts     | -13.224 | 2.630 | <b>5.00E-07</b> | -46.871 | 18.969 | 1.35E-02 | -44.936 | 13.242 | <b>6.92E-04</b> |
| Kidney Cortex                     | -1.762  | 0.924 | 5.65E-02        | -6.758  | 6.599  | 3.06E-01 | -4.428  | 4.644  | 3.40E-01        |
| Lung                              | 20.361  | 5.216 | <b>9.53E-05</b> | 74.485  | 37.386 | 4.63E-02 | 42.162  | 26.222 | 1.08E-01        |
| Minor Salivary Gland              | -3.379  | 1.122 | 2.61E-03        | -17.953 | 8.067  | 2.60E-02 | -9.387  | 5.643  | 9.62E-02        |
| Nerve Tibial                      | -4.228  | 0.844 | <b>5.58E-07</b> | -11.668 | 6.036  | 5.32E-02 | -12.328 | 4.247  | 3.70E-03        |
| Skin Not Sun Exposed (Suprapubic) | -10.573 | 3.592 | 3.25E-03        | -46.750 | 25.791 | 6.99E-02 | -14.686 | 18.055 | 4.16E-01        |
| Skin Sun Exposed (Lower leg)      | -3.269  | 2.084 | 1.17E-01        | -18.319 | 14.996 | 2.22E-01 | -7.293  | 10.477 | 4.86E-01        |

## References

1. Sakaue, S., Kanai, M., Tanigawa, Y., Karjalainen, J., Kurki, M., Koshihara, S., Narita, A., Konuma, T., Yamamoto, K., Akiyama, M., et al. (2021). A cross-population atlas of genetic associations for 220 human phenotypes. *Nature genetics* *53*, 1415-1424. 10.1038/s41588-021-00931-x.
2. Pei, Y.F., Liu, Y.Z., Yang, X.L., Zhang, H., Feng, G.J., Wei, X.T., and Zhang, L. (2020). The genetic architecture of appendicular lean mass characterized by association analysis in the UK Biobank study. *Commun Biol* *3*, 608. 10.1038/s42003-020-01334-0.
3. Christakoudi, S., Evangelou, E., Riboli, E., and Tsilidis, K.K. (2021). GWAS of allometric body-shape indices in UK Biobank identifies loci suggesting associations with morphogenesis, organogenesis, adrenal cell renewal and cancer. *Sci Rep* *11*, 10688. 10.1038/s41598-021-89176-6.
4. Morris, J.A., Kemp, J.P., Youlten, S.E., Laurent, L., Logan, J.G., Chai, R.C., Vulpescu, N.A., Forgetta, V., Kleinman, A., Mohanty, S.T., et al. (2019). An atlas of genetic influences on osteoporosis in humans and mice. *Nature genetics* *51*, 258-266. 10.1038/s41588-018-0302-x.
5. Hirata, T., Koga, K., Johnson, T.A., Morino, R., Nakazono, K., Kamitsuji, S., Akita, M., Kawajiri, M., Kami, A., Hoshi, Y., et al. (2018). Japanese GWAS identifies variants for bust-size, dysmenorrhea, and menstrual fever that are eQTLs for relevant protein-coding or long non-coding RNAs. *Sci Rep* *8*, 8502. 10.1038/s41598-018-25065-9.
6. Sinnott-Armstrong, N., Tanigawa, Y., Amar, D., Mars, N., Benner, C., Aguirre, M., Venkataraman, G.R., Wainberg, M., Ollila, H.M., Kiiskinen, T., et al. (2021). Genetics of 35 blood and urine biomarkers in the UK Biobank. *Nature genetics* *53*, 185-194. 10.1038/s41588-020-00757-z.
7. Mills, M.C., Tropf, F.C., Brazel, D.M., van Zuydam, N., Vaez, A., Pers, T.H., Snieder, H., Perry, J.R.B., Ong, K.K., den Hoed, M., et al. (2021). Identification of 371 genetic variants for age at first sex and birth linked to externalising behaviour. *Nat Hum Behav* *5*, 1717-1730. 10.1038/s41562-021-01135-3.
8. Rashkin, S.R., Graff, R.E., Kachuri, L., Thai, K.K., Alexeeff, S.E., Blatchins, M.A., Cavazos, T.B., Corley, D.A., Emami, N.C., Hoffman, J.D., et al. (2020). Pan-cancer study detects genetic risk variants and shared genetic basis in two large cohorts. *Nature communications* *11*, 4423. 10.1038/s41467-020-18246-6.
