# Supplementary material for: Novel insights into the genetic architecture of pregnancy glycemic traits from 14,744 Chinese maternities
Source: PubMed Central journal article supplement — Cell Genom. 2024 Oct 9;4(10):100631. doi: 10.1016/j.xgen.2024.100631 (PMC11602577; doi:10.1016/j.xgen.2024.100631), 2024-10-09
Supplement: mmc2.pdf [file mmc2.pdf]

# Novel insights into the genetic architecture of pregnancy glycemic traits from 14,744 Chinese maternities

## Graphical abstract

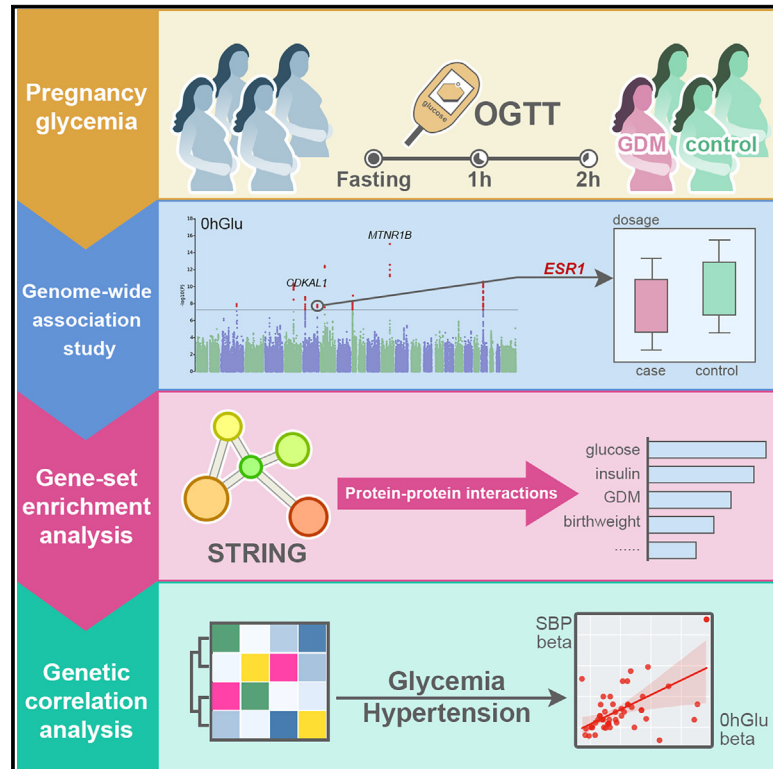

## Authors

Huanhuan Zhu, Han Xiao, Linxuan Li, ..., Jian Wang, Xin Jin, Aifen Zhou

## Correspondence

jinxin@genomics.cn (X.J.), april1972@163.com (A.Z.)

## In brief

Zhu et al. analyzed 14,744 Chinese pregnant women, identifying 25 genetic associations with glycemic traits via GWAS. They discovered a novel link between fasting glucose and the *ESR1* gene and validated this by an independent study. Further analyses provided a genetic insight into the relationship between pregnancy glycemic traits and hypertension.

## Highlights

- Glycemic traits GWAS involving 14,744 Chinese pregnant women identify 25 genetic loci
- Newly discovered *ESR1* association provides insights into maternal glucose levels
- Highlighted a potential causal relationship between hypertension and glycemic traits

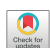

## Article

# Novel insights into the genetic architecture of pregnancy glyceemic traits from 14,744 Chinese maternities

Huanhuan Zhu,<sup>1,2,15</sup> Han Xiao,<sup>3,15</sup> Linxuan Li,<sup>1,4,15</sup> Meng Yang,<sup>3,15</sup> Ying Lin,<sup>1,4,15</sup> Jieqiong Zhou,<sup>5,15</sup> Xinyi Zhang,<sup>1,4</sup> Yan Zhou,<sup>5</sup> Xianmei Lan,<sup>1,4</sup> Jiuying Liu,<sup>5</sup> Jingyu Zeng,<sup>1,6</sup> Lin Wang,<sup>1</sup> Yuanyuan Zhong,<sup>5</sup> Xiaobo Qian,<sup>1,4</sup> Zhongqiang Cao,<sup>3</sup> Panhong Liu,<sup>1</sup> Hong Mei,<sup>3</sup> Mingzhi Cai,<sup>1</sup> Xiaonan Cai,<sup>3</sup> Zhuangyuan Tang,<sup>1</sup> Liqin Hu,<sup>3</sup> Rui Zhou,<sup>7</sup> Xun Xu,<sup>1,8</sup> Huanming Yang,<sup>1,9,10</sup> Jian Wang,<sup>11</sup> Xin Jin,<sup>1,2,12,13,14,16,\*</sup> and Aifen Zhou<sup>3,5,\*</sup>

<sup>1</sup>BGI Research, Shenzhen 518083, China

<sup>2</sup>BGI Research, Wuhan 430074, China

<sup>3</sup>Institute of Maternal and Child Health, Wuhan Children's Hospital (Wuhan Maternal and Child Health Care Hospital), Tongji Medical College, Huazhong University of Science and Technology, Wuhan 430010, China

<sup>4</sup>College of Life Sciences, University of Chinese Academy of Sciences, Beijing 100049, China

<sup>5</sup>Department of Obstetrics, Wuhan Children's Hospital (Wuhan Maternal and Child Health Care Hospital), Tongji Medical College, Huazhong University of Science and Technology, Wuhan 430010, China

<sup>6</sup>College of Life Sciences, Northwest A&F University, Yangling, Shaanxi 712100, China

<sup>7</sup>BGI, Wuhan 430074, China

<sup>8</sup>Guangdong Provincial Key Laboratory of Genome Read and Write, BGI Research, Shenzhen 518120, China

<sup>9</sup>Guangdong Provincial Academician Workstation of BGI Synthetic Genomics, BGI, Shenzhen 518120, China

<sup>10</sup>James D. Watson Institute of Genome Sciences, Hangzhou 310058, China

<sup>11</sup>BGI, Shenzhen 518083, China

<sup>12</sup>The Innovation Centre of Ministry of Education for Development and Diseases, School of Medicine, South China University of Technology, Guangzhou 510006, China

<sup>13</sup>Shanxi Medical University-BGI Collaborative Center for Future Medicine, Shanxi Medical University, Taiyuan 030001, China

<sup>14</sup>Shenzhen Key Laboratory of Transomics Biotechnologies, BGI Research, Shenzhen 518083, China

<sup>15</sup>These authors contributed equally

<sup>16</sup>Lead contact

\*Correspondence: [jinxin@genomics.cn](mailto:jinxin@genomics.cn) (X.J.), [april1972@163.com](mailto:april1972@163.com) (A.Z.)

<https://doi.org/10.1016/j.xgen.2024.100631>

## SUMMARY

Glyceemic traits are critical indicators of maternal and fetal health during pregnancy. We performed genetic analysis for five glyceemic traits in 14,744 Chinese pregnant women. Our genome-wide association study identified 25 locus-trait associations, including established links between gestational diabetes mellitus (GDM) and the genes *CDKAL1* and *MTNR1B*. Notably, we discovered a novel association between fasting glucose during pregnancy and the *ESR1* gene (estrogen receptor), which was validated by an independent study in pregnant women. The *ESR1*-GDM link was recently reported by the FinnGen project. Our work enhances the findings in East Asian populations and highlights the need for independent studies. Further analyses, including genetic correlation, Mendelian randomization, and transcriptome-wide association studies, provided genetic insights into the relationship between pregnancy glyceemic traits and hypertension. Overall, our findings advance the understanding of genetic architecture of pregnancy glyceemic traits, especially in East Asian populations.

## INTRODUCTION

Pregnancy glyceemic traits (e.g., fasting glucose) play a critical role in assessing and managing maternal health during pregnancy and serve as indicators of glucose metabolism and gestational diabetes mellitus (GDM).<sup>1</sup> Understanding the genetic basis of pregnancy glyceemic traits may provide insights into the underlying genetic factors influencing maternal glucose regulation during pregnancy. To date, numerous genome-wide association studies (GWASs) have identified candidate genetic variants associated with glyceemic traits in normal populations.<sup>2–4</sup> How-

ever, there has been limited research on glyceemic traits during pregnancy, with only a few studies exploring this area, especially in the Chinese population.<sup>5–7</sup>

Clinical studies have focused on potential risk factors and adverse outcomes associated with abnormal glucose levels during pregnancy. In general, maternal age, obesity, polycystic ovary syndrome, and previous history of hyperglycemia increase a woman's susceptibility to developing GDM.<sup>8–10</sup> Elevated maternal blood glucose levels lead to increased fetal growth, causing macrosomia, infants born large for their gestational age, and a higher likelihood of cesarean section.<sup>11–13</sup> Moreover,

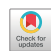

hyperglycemia during pregnancy is often associated with other complications during and after pregnancy, notably hypertension.<sup>11,14</sup> However, the genetic architecture underlying the relationship between pregnancy glycemic traits and hypertension has not been fully explored.

Non-invasive prenatal testing (NIPT) has emerged as an effective approach to reduce the birth rate of children with fetal autosomal trisomies.<sup>15</sup> NIPT involves sequencing cell-free DNA fragments, including fetal cell-free DNA, obtained from maternal peripheral plasma utilizing next-generation sequencing technology. Compared to the traditional genetic research pipeline of “sampling, sequencing, and analyzing,” using NIPT data significantly reduces both sequencing time and research costs, as genotype data are generated alongside clinical prenatal tests. Additionally, with the growing popularity of NIPT technology worldwide, it has generated an immense amount of genotype data, nearly ten times that of whole-genome sequencing samples.<sup>16</sup> Previously, we demonstrated the validity of using large-scale NIPT sequencing data for population genetics and GWASs.<sup>17,18</sup>

In this study, we investigate the genetic basis of five pregnancy glycemic traits using NIPT sequence data, which include three glucose levels based on the oral glucose tolerance test (OGTT), the area under the curve of these three measurements, and GDM. In total, we identified 25 locus-trait associations, including several well-known examples such as the association of GDM with the genes *CDKAL1* and *MTNR1B*, and fasting glucose levels with the gene *PCSK1*. A significant new association was discovered between fasting glucose levels during pregnancy and the *ESR1* gene (estrogen receptor). This finding was subsequently confirmed by an independent study in pregnant women. Notably, the *ESR1*-GDM association was recently reported by the FinnGen project.<sup>19</sup> Our work not only enriches the findings specific to East Asian populations but also underscores the necessity for independent studies. Additional analyses, including genetic correlation, Mendelian randomization (MR), transcriptome-wide association study (TWAS), and drug target enrichment analysis (DTEA), have provided deeper genetic insights into the relationship between glycemic traits during pregnancy and hypertension. These findings offer insights into the genetic landscape of pregnancy glycemic traits, particularly within East Asian populations.

## RESULTS

### Participants and data types

In this study, we used two data types: whole-genome sequence (WGS) data from the NIPT test and pregnancy glycemic traits from the OGTT test. For participants with NIPT WGS data, we included those with a sequencing depth greater than 0.05 and a mapping rate above 90%, resulting in a cohort of 38,668 individuals. All were used in genotype imputation to ensure the highest possible accuracy. Additionally, there were 21,813 subjects who underwent the OGTT and had glycemic measurements. We employed all 21,813 subjects for subsequent regression analysis involving other clinical phenotypes. For the GWAS analysis, we used participants who possessed both NIPT sequence data and glycemic data, totaling 14,889 individuals (Figure S1A).

For the 38,668 individuals with NIPT sequence data, we assessed gestational age at the time of the NIPT test and fetal fraction in maternal plasma (Figure S1B), as provided in the NIPT reports. Specifically, gestational age information was available for 28,037 participants, with an average of 16.16 weeks (113.13 days). Additionally, fetal fraction data were obtained for 15,837 participants, with an average of 9.76%, aligning with our literature review (STAR Methods). For the 21,813 subjects with pregnancy glycemic traits, we provided distributions of maternal information and birth outcomes (Figures S1C–S1D). Maternal characteristics included age ( $29.58 \pm 4.03$  years), BMI ( $21.39 \pm 3.08$  kg/m<sup>2</sup>), first-time pregnancy status, and hypertension. Birth outcomes included gestational age ( $38.74 \pm 1.58$  weeks), birth weight ( $3286.43 \pm 473.71$  g), delivery type, and newborn gender.

### Pregnancy glycemic traits

Applying the criteria of 0hGlu  $\geq 5.1$  mmol/L, 1hGlu  $\geq 10.0$  mmol/L, and 2hGlu  $\geq 8.5$  mmol/L, 2,502 out of 21,813 pregnant women were diagnosed with GDM, resulting in a disease rate of 11.47% (Figure S2A). This rate is slightly lower than the 14.8% reported in a 2019 meta-analysis conducted in mainland China.<sup>20</sup> After integrating NIPT sequence data, we retained 14,744 subjects, among which 1,619 were GDM cases, and 13,125 were controls. This subset was used for the GWAS analysis. For the 0hGlu, 1hGlu, and 2hGlu measurements, the available sample sizes for the GWAS were 14,889, 14,790, and 14,760, respectively. We provided the distributions of the three glucose levels among the GDM case and control groups (Figure S2A).

Additionally, we computed the area under the curve (AUC) for the three OGTT glucose levels, which served as a metric for glucose tolerance during pregnancy and was denoted as GDM<sub>AUC</sub> (Figure S2B). The sample size for the GWAS of GDM<sub>AUC</sub> was 14,726.

### Regression analysis between GDM and multi-phenotypes

Using a significance threshold of  $5.15E-4$ , univariate regression analysis identified 26 risk factors for GDM and 29 for GDM<sub>AUC</sub> (Tables 1 and S1 and Figure S2C). Among the maternal information, age was most significant (for GDM: odds ratio [OR] = 1.112 and  $p$  value =  $4.19E-98$ , for GDM<sub>AUC</sub>: beta = 0.135 and  $p$  value =  $5.20E-283$ ), followed by BMI, multiparity, and hypertension. Among the 93 early-stage laboratory tests, the most significant features were blood glucose (GLU), prealbumin (PA),  $\gamma$ -glutamyl transferase (GGT), urine glucose (GLU\_U), and uric acid, being correlated with GDM in previous studies.<sup>21–29</sup> In the multivariate regression analysis, to ensure an effective sample size of 3,000 for each variable, we tested 20 out of 26 factors for GDM and 24 out of 29 for GDM<sub>AUC</sub>, identifying five and nine significant risk factors, respectively (Tables S2 and S3). Notably, age was the only significant maternal factor for GDM multivariately ( $p$  value =  $2.78E-10$ ).

Women with GDM tend to have shorter gestational lengths (OR = 0.662,  $p$  value =  $8.84E-35$ ), undergo cesarean sections at higher rates (OR = 1.481,  $p$  value =  $2.76E-19$ ), and deliver a low-birth-weight (OR = 1.517,  $p$  value =  $3.26E-06$ ) or macrosomic infant

**Table 1. Regression results for GDM/GDM<sub>AUC</sub> and risk factors and outcomes**

| Category              | Traits                      | Mean ± std./n (%) |                   | Regression results of GDM |        |       |        | Regression results of GDM <sub>AUC</sub> |        |        |       |           |
|-----------------------|-----------------------------|-------------------|-------------------|---------------------------|--------|-------|--------|------------------------------------------|--------|--------|-------|-----------|
|                       |                             | All samples       | In GDM control    | In GDM case               | n      | OR    | Std.   | p value                                  | n      | Beta   | Std.  | p value   |
| Risk factors          | age (years)                 | 29.58 ± 4.03      | 29.37 ± 3.94      | 31.20 ± 4.32              | 21,808 | 1.112 | 0.005  | 4.19E-98                                 | 21,786 | 0.135  | 0.004 | 5.20E-283 |
|                       | BMI (kg/m <sup>2</sup> )    | 21.39 ± 3.08      | 21.22 ± 2.98      | 22.67 ± 3.45              | 19,161 | 1.143 | 0.007  | 3.42E-87                                 | 19,140 | 0.159  | 0.005 | 3.04E-199 |
|                       | first-time pregnancy, n (%) | 7,769 (55.73%)    | 7,176 (57.09%)    | 593 (43.25%)              | 13,941 | 0.573 | 0.057  | 2.98E-22                                 | 13,931 | -0.539 | 0.038 | 3.36E-46  |
| Outcomes              | hypertension, n (%)         | 308 (1.41%)       | 233 (1.21%)       | 75 (3.00%)                | 21,813 | 2.530 | 0.134  | 5.12E-12                                 | 21,791 | 1.143  | 0.129 | 1.06E-18  |
|                       | gestational weeks (weeks)   | 38.74 ± 1.58      | 38.78 ± 1.55      | 38.37 ± 1.74              | 21,808 | 0.662 | 0.033  | 8.84E-35                                 | 21,786 | -0.077 | 0.005 | 1.88E-60  |
|                       | birth weight (g)            | 3,286.43 ± 473.71 | 3,287.08 ± 464.74 | 3,281.42 ± 537.96         | 21,672 | 0.003 | 10.096 | 5.75E-01                                 | 21,650 | 4.475  | 1.424 | 1.68E-03  |
|                       | low birthweight, n (%)      | 979 (4.52%)       | 821 (4.28%)       | 158 (6.35%)               | 21,672 | 1.517 | 0.090  | 3.26E-06                                 | 21,650 | 0.069  | 0.013 | 1.48E-07  |
|                       | giant baby, n (%)           | 1,054 (4.86%)     | 889 (4.63%)       | 165 (6.63%)               | 21,672 | 1.462 | 0.088  | 1.43E-05                                 | 21,650 | 0.100  | 0.012 | 1.37E-16  |
| newborn gender, n (%) | c-section, n (%)            | 11,789 (54.10%)   | 10,225 (53.01%)   | 1,564 (62.56%)            | 21,790 | 1.481 | 0.044  | 2.76E-19                                 | 21,768 | 0.096  | 0.006 | 4.11E-52  |
|                       | newborn gender, n (%)       | 10,418 (48.07%)   | 9,218 (48.05%)    | 1,200 (48.25%)            | 21,673 | 1.008 | 0.043  | 8.47E-01                                 | 21,651 | 0.005  | 0.006 | 3.89E-01  |

Notes: in the columns of "All sample," "In GDM control" and "In GDM case," for quantitative traits, we provide the mean and standard deviation of each variable; for dichotomous traits, we provide the number of positive samples for the corresponding trait in each group and the percentage of positive samples to the total sample size in that group.

(OR = 1.462, *p* value = 1.43E-05) (Table 1). The gender of newborn is not a significant birth outcome with GDM (OR = 1.008, *p* value = 0.847). At a 3.33E-03 (= 0.05/15) threshold, four diagnoses were significantly associated with GDM and seven with GDM<sub>AUC</sub>, including pregnancy with uterine scar and intrauterine distress (Table S4). Additional diagnoses significantly associated with GDM<sub>AUC</sub> were eclampsia (*t* = 5.272, *p* value = 1.37E-07), pregnancy with vomiting (*t* = -3.924, *p* value = 8.75E-05), and gestational hypertension (*t* = 3.795, *p* value = 1.48E-04) (Figure S2D). Numerous studies have reported positive associations between preeclampsia/eclampsia and GDM.<sup>14,30,31</sup>

### Genotype imputation performance

Note that, from December 2018, the sequencing depth of the NIPT product was increased. We excluded 1,719 samples with unknown test dates, resulting in 10,795 pregnant women with an average depth of 0.1049× before December 2018 and 26,154 participants with an average depth of 0.1644× afterward, with an overall average depth of 0.1525× (Figure S3A).

After STITCH imputation (STAR Methods), we obtained a total of 8,134,302 SNPs. Filtering out SNPs with a Hardy-Weinberg equilibrium (HWE) *p* value < 1E-6 and minor allele frequency (MAF) < 0.05 resulted in 2,818,480 high-quality SNPs. We assessed imputation accuracy of these high-quality SNPs using Pearson's correlation between the imputed genotype dosage and the original high-depth genotype of 30 Chinese samples from the 1000 Genomes Project (1KGP). On average, the imputation accuracy *R* was 87.61%, and *R*<sup>2</sup> was 79.34% (Figure S3B). More imputation evaluation results, including additional datasets and results at the specific SNP level, are described in our companion work.<sup>32</sup> Additionally, we computed the Pearson's correlation (*R*<sup>2</sup>) for the frequency of non-reference alleles of these high-quality SNPs in our dataset and the East Asian samples from the 1KGP (Figure S3C). The *R*<sup>2</sup> of 0.97 indicates a high consistency of our imputed variants with those in the 1KGP.

We utilized BaseVar for population variation detection and conducted principal component analysis (PCA) on the identified variants to reveal population structure (STAR Methods). Additionally, we acquired population structure information derived from the PCA plot of 585 samples representing 30 administrative divisions in China. These divisions were further categorized into seven main geographical regions spanning from north to south China. These samples were independently recruited in a study approved by the institutional review board at BGI (BGI-IRB 21163) and authorized by the Human Genetic Resources Administration of China ([2022] CJ0197). We projected the principal components plot of the main data onto the reference data and presented the plot in Figure S3D. Notably, the main samples exhibited a significant overlap with samples from the Huazhong area, which corresponds to central China and aligns with the location of Wuhan.

### GWAS analysis of glycemic traits

We performed GWAS analysis for three OGTT traits, GDM, and GDM<sub>AUC</sub> (Figures 1 and 2 and Table S5). The full GWAS summary statistics for these traits are available on our MANE (Maternal

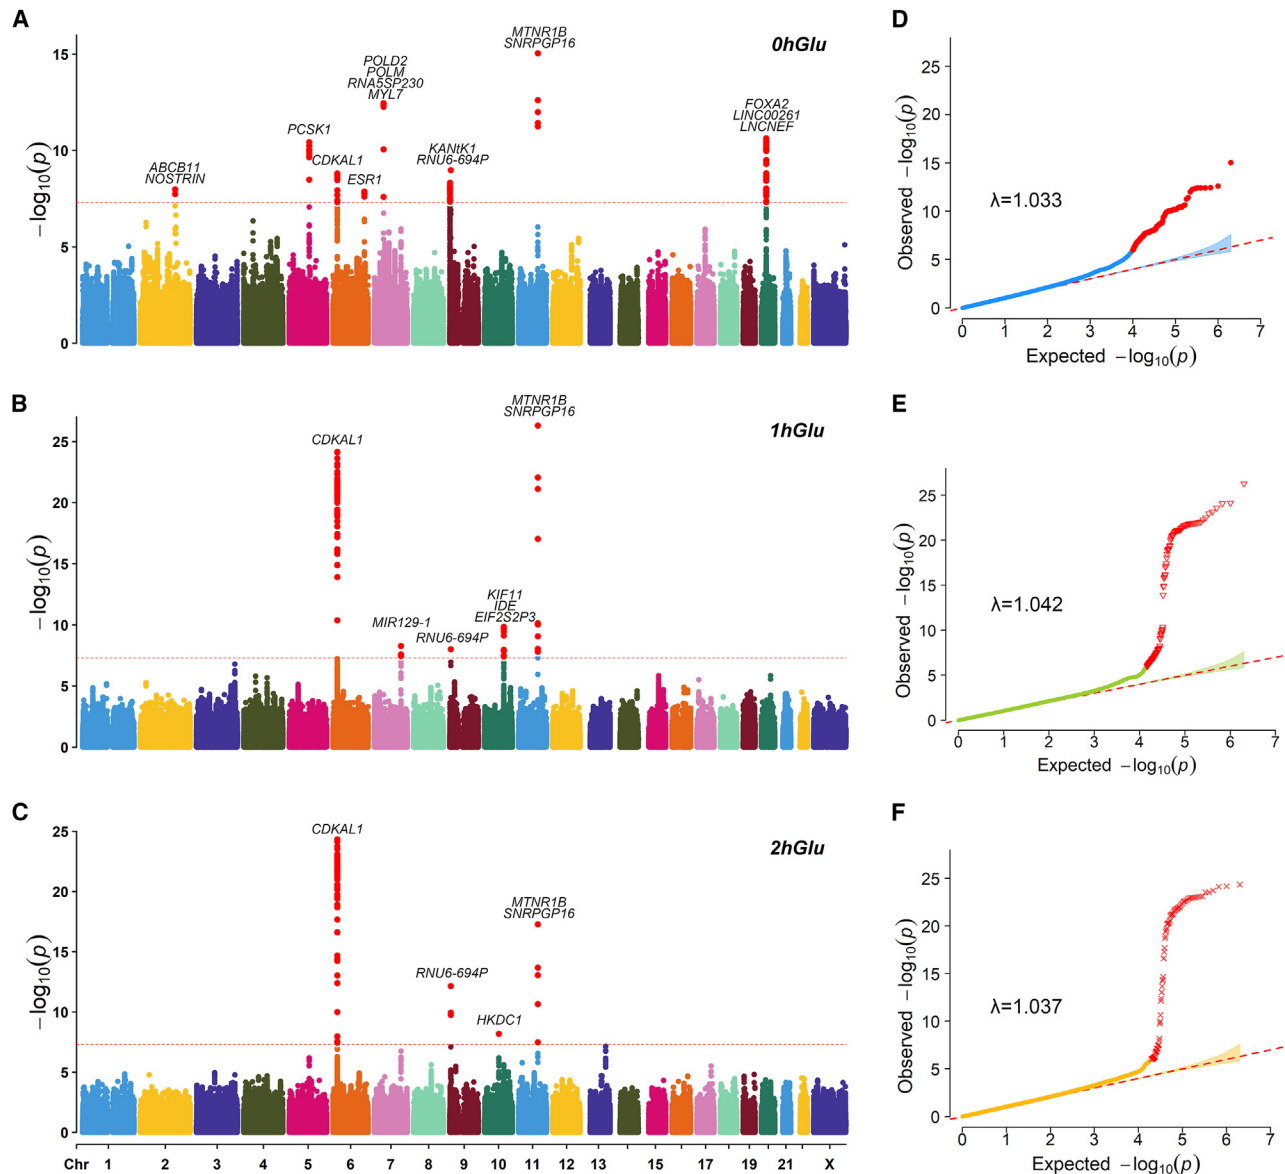

**Figure 1. The GWAS results of three OGTT measurements**

(A–C) Manhattan plots of three OGTT measurements; SNPs that pass the genome-wide threshold ( $5E-8$ ) were colored in red. (D–F) QQ-plots of three OGTT measurements with genomic inflation factor  $\lambda$ .

and Neonatal) PheWeb website.<sup>33</sup> In total, we identified 25 trait-locus associations, with many previously associated either with pregnancy glycaemic traits (e.g., *CDKAL1*, *MTNR1B*, and *PCSK1*)<sup>6</sup> or with glucose levels in the general population (e.g., *POLD2*).<sup>34–36</sup>

Two genes, *CDKAL1* and *MTNR1B*, were consistently associated with all five traits, as previously reported to be associated with GDM.<sup>5,7,19,37,38</sup> *CDKAL1* has been associated with proinsulin conversion defect and glucose-stimulated insulin response defect.<sup>39,40</sup> *MTNR1B* (melatonin receptor 1B) encodes one of the two high-affinity forms of a receptor for the hormone melatonin, playing a role in glucose homeostasis.<sup>41</sup>

For GDM status, the lead SNPs mapped on the two genes were rs35261542 (*CDKAL1*,  $p$  value =  $3.88E-12$ ) and rs3781637 (*MTNR1B*,  $p$  value =  $3.29E-09$ ), respectively. In Table S6, we provided details on the two SNPs and known GDM-associated SNPs. Notably, rs35261542 was significant in the mixed population study,<sup>37</sup> while rs3781637 has not previously been reported in association with GDM. Additionally, allele frequency of rs3781637 significantly differed between East Asian and European populations.

The heritabilities (standard error) for 0hGlu, 1hGlu, 2hGlu, GDM, and GDM<sub>AUC</sub> were 0.1308 (0.0372), 0.1395 (0.04), 0.0611 (0.04), 0.0817 (0.0977), and 0.1429 (0.0421), respectively.

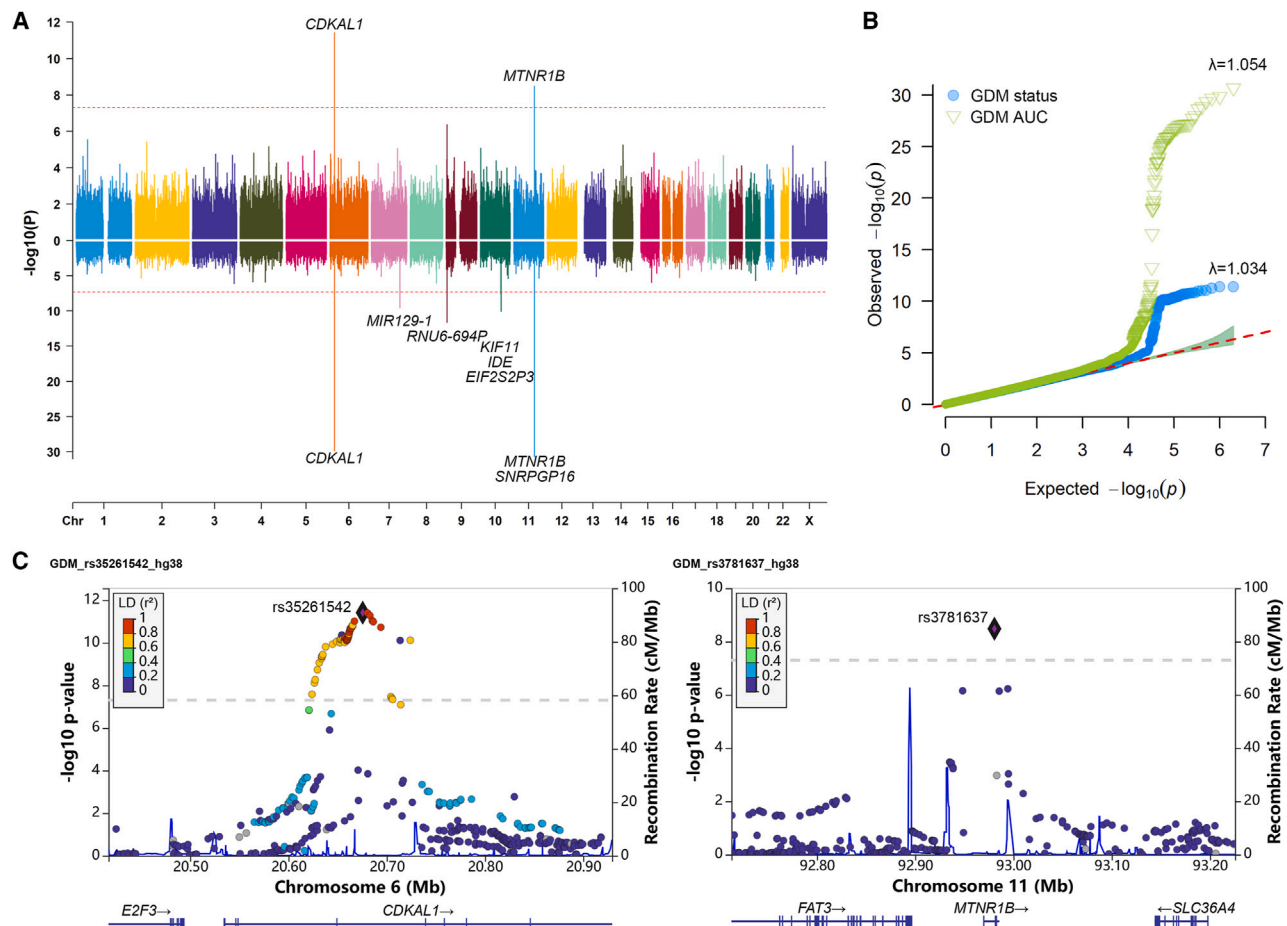

**Figure 2. The GWAS results of GDM status and  $GDM_{AUC}$**

(A) Mirrored Manhattan plot indicates the GWAS results of GDM status and  $GDM_{AUC}$ , located on top and bottom, respectively; the red dashed line represents the genome-wide significance threshold ( $5E-8$ ).  
 (B) QQ plot for GDM status and  $GDM_{AUC}$  with genomic inflation factor  $\lambda$ .  
 (C) Regional plots of two loci *CDKAL1* and *MTNR1B* for testing GDM.

### Validation study

Here, we selected a recently published study involving 22,882 Chinese pregnant women from Shenzhen Bao'an Women's and Children's Hospital,<sup>7</sup> referred to as the Shenzhen cohort. This cohort underwent the same OGTT protocol as our study participants. We downloaded their GWAS results of fasting glucose, 1-h and 2-h glucose levels after consuming 75 g of sugar, and GDM status from the GWAS catalog.

In detail, 20 out of the 25 trait-locus associations were subject to replication, as 5  $GDM_{AUC}$ -associated loci were removed because the Shenzhen cohort did not test for  $GDM_{AUC}$ . For each of the 20 trait-locus associations, we examined a flanking window of 500 kb in the Shenzhen cohort. An association was considered replicated if at least one SNP within this window had a  $p$  value less than  $1E-4$  and a linkage disequilibrium (LD)  $r^2$  greater than 0.1. Among the 20 associations, 19 were successfully replicated, with the sole exception being 1hGLU-*MIR129-1* (Figure 3). The gene *MIR129-1* has previously been reported to be associated with type 2 diabetes in

East Asian populations.<sup>42,43</sup> The replication study underscores the robustness of our GWAS findings on the pregnancy glycaemic traits.

### A novel gene *ESR1*

We identified *ESR1* as a candidate gene associated with fasting glucose (0hGlu), with lead SNP rs3020430 ( $p$  value =  $1.36E-08$ ). Recently, the FinnGen project, with 12,332 GDM cases and 131,109 parous female controls, identified *ESR1* as a novel gene associated with GDM through GWAS, with rs537224022 as the lead SNP.<sup>19</sup> The MAF of this SNP is 0.006 in European populations and undetectable (0.00) in East Asian populations, which explains its absence in our dataset.

The gene *ESR1* encodes an estrogen receptor and ligand-activated transcription factor, which regulates estrogen-inducible genes that play a role in growth, metabolism, sexual development, gestation, and other reproductive system.<sup>44</sup> To validate our finding of the effects of *ESR1* on fasting glucose,

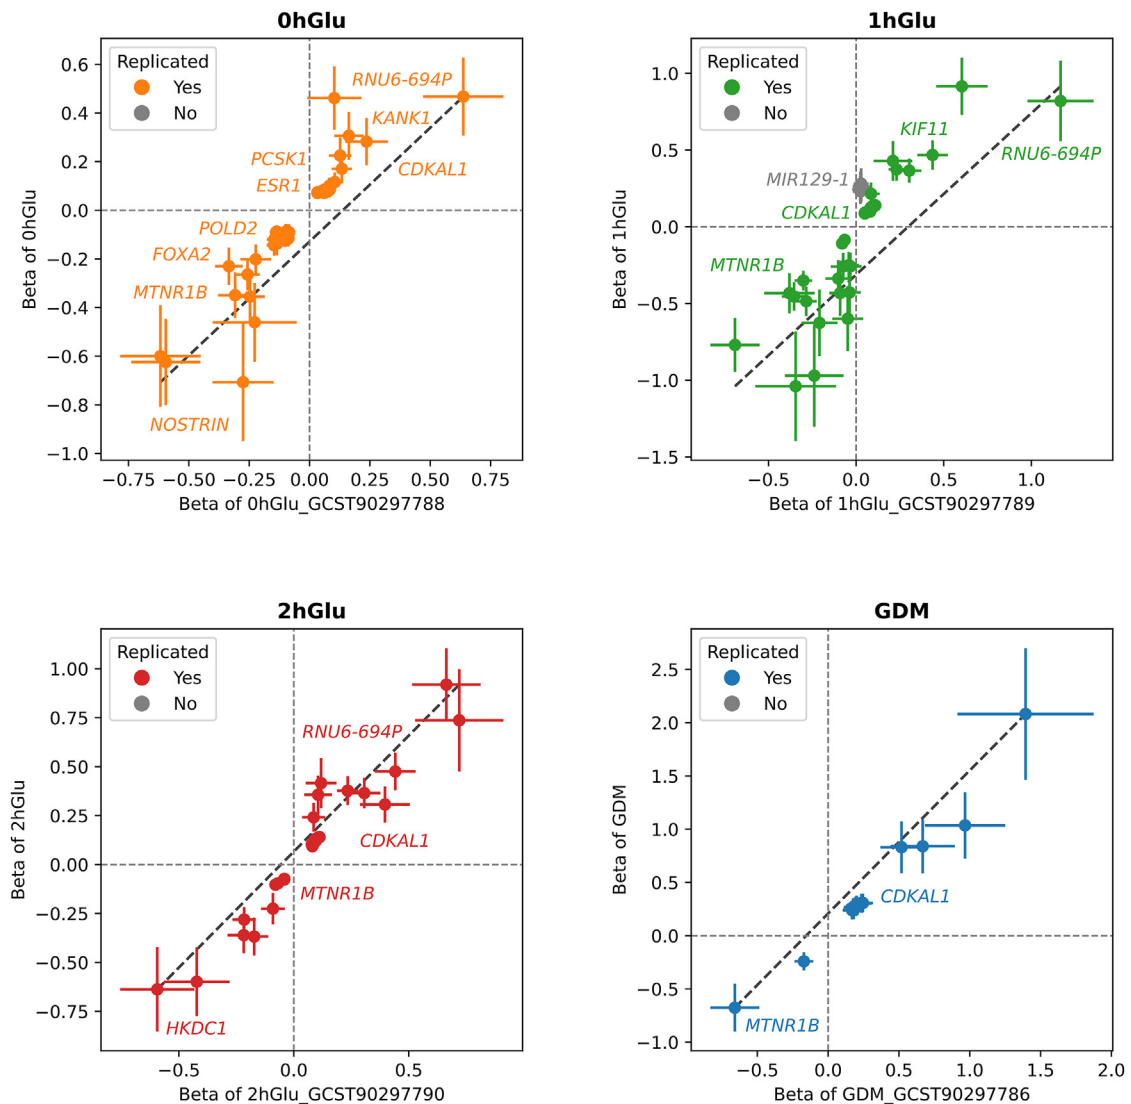

**Figure 3. The comparison between the GWAS results in this study and the replication study**

The forest plots between this study and the replication study, for 0hGlu, 1hGlu, 2hGlu, and GDM, respectively; the position of the dots represents the beta values of the two studies, and the lines represent the range of one standard deviation above and below; the successfully replicated variants in both studies are marked in color, or otherwise are marked in gray.

we performed a GWAS-GWAS colocalization analysis<sup>45</sup> with the Shenzhen cohort<sup>7</sup> using the *coloc::coloc.abf*<sup>46</sup> in R. In the Shenzhen cohort's GWAS summary of fasting glucose, the lead SNP in the *ESR1* gene is rs9322351, with a  $p$  value of  $6.91E-06$  (in LD with rs3020430,  $r^2 = 0.4008$ , in the 1KGP EAS samples, GRCh38). The posterior probability of H4 (indicating one common causal variant) was 0.84, surpassing the threshold of 0.75, signifying a shared causal signal. We employed the R function *locuscompare*<sup>47</sup> to generate regional plots (Figure S4). Additional literature has reported associations between *ESR1* and pregnancy, such as its link to susceptibility to recurrent pregnancy loss in a Tunisian study,<sup>48</sup> as well as estrogen dysregulation contributing to preeclampsia occurrence.<sup>49,50</sup>

Upon analyzing all 1,536 SNPs within the *ESR1* gene from our dataset, we conducted annotation analysis to glean functional insights for each mutation site (Figure 4A). Notably, 96.2% of the SNP sites are situated within intron regions, lacking direct involvement in protein encoding. Upon further investigation beyond our dataset to encompass all SNPs in *ESR1*, we observed a region within the *ESR1* association peak that falls within exon 5 (Figure 4B). This region harbors three pathogenic/likely pathogenic variants (rs397509428, rs1131692059, and rs1057519827) according to the ClinVar database,<sup>51</sup> with linked diseases encompassing estrogen resistance syndrome and breast neoplasms.<sup>52,53</sup> We hypothesize that these SNPs may exert influence on glycemic levels during pregnancy by modulating estrogen resistance and interacting with insulin levels.<sup>54–56</sup>

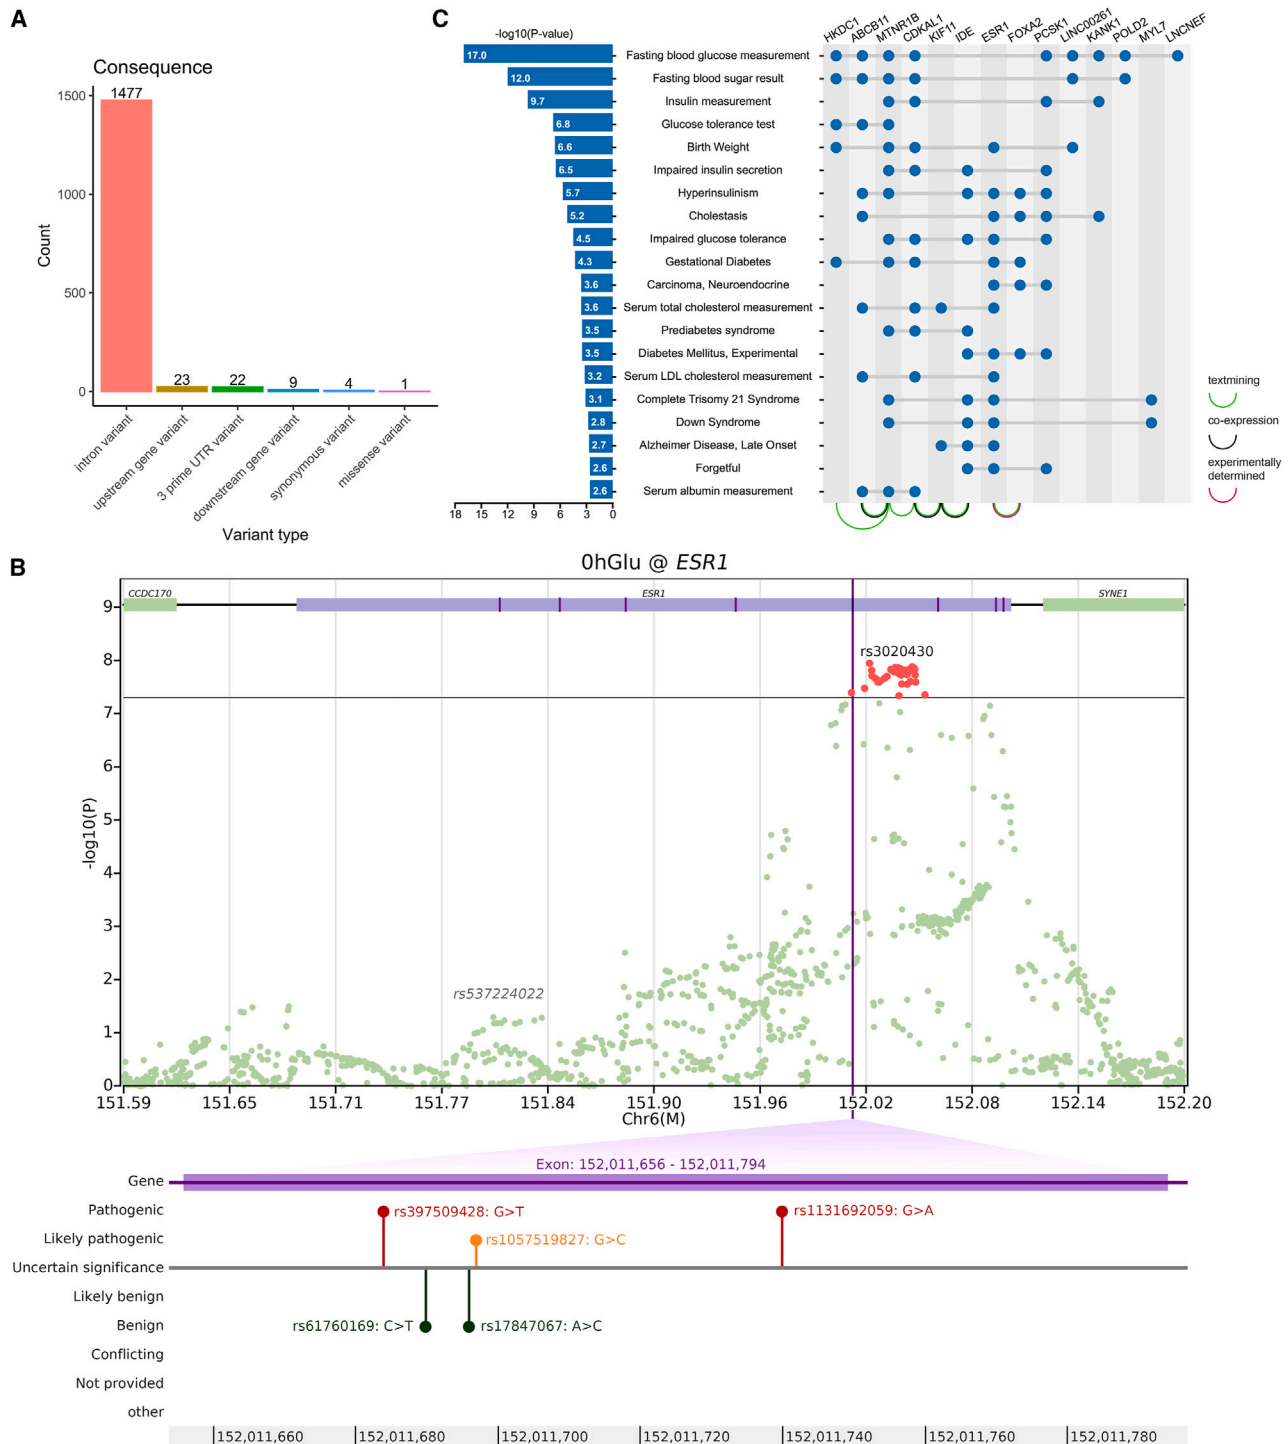

**Figure 4. The GWAS result and annotation information on *ESR1* and the results of gene set enrichment analysis**

(A) The bar plot showing the variant count of each category for functional annotation on *ESR1*.

(B) The regional plot for OhGlu on *ESR1*, with the fifth exon and potential pathogenic variants indicated below.

(C) The results of the gene set enrichment analysis for all genes correlated to glycemic traits, the  $-\log_{10} p$  values are displayed on the left side using a bar plot, the genes corresponding to each pathway are marked with blue dots on the right side, and the interactions between each gene are indicated with curves below.



### Gene set enrichment analysis

A total of 21 mapped genes associated with pregnancy glycemic traits were identified, including 14 protein-coding genes, 4 pseudogenes, and 3 non-coding RNAs (Table S5). Since PPI (protein-protein interactions) analysis excludes pseudogenes and non-coding RNAs, the 14 protein-coding genes were included in the STRING PPI analysis (Figure 4C). The majority of PPIs were derived from text mining, with a minority being co-expressed and one interaction experimentally determined. Among the gene pairs potentially influencing pregnancy glycemic levels through co-expression are *MTNR1B* and *ABCB11*, *CDKAL1* and *KIF11*, as well as *KIF11* and *IDE*. Notably, an experimentally determined interaction was observed between *ESR1* and *FOXA2*. Studies using a *Foxa2* knockout mouse model have demonstrated that *Foxa2* regulates the estrogen responsiveness and influences *ESR1* transcriptional activity in the uterus.<sup>57</sup>

At a significance threshold of  $p$  value  $<0.01$ , requiring a minimum gene count of 3, and an enrichment factor  $>1.5$ , the gene set enrichment analysis identified enrichment in 20 functional pathways (Figure 4C). The top five pathways included fasting blood glucose measurement, fasting blood sugar result, insulin measurement, glucose tolerance test, and birth weight. Notably, genes such as *HKDC1*, *MTNR1B*, *CDKAL1*, *ESR1*, and *LINC00261* were found in the birth weight pathway. Additionally, the pathway associated with gestational diabetes featured genes including *HKDC1*, *MTNR1B*, *CDKAL1*, *ESR1*, and *FOXA2*. Both the birth weight and the gestational diabetes pathway involved gene *ESR1*, suggesting its essential role in maternal and fetal conditions during pregnancy.

### Genetic correlation analysis

Building upon our earlier discovery that *ESR1* is a gene associated with pregnancy glycemic traits and considering the prominence of hormone signaling revealed in the pathway-based analysis, we delved deeper into the association between *ESR1* and pregnancy glycemic traits (Figure 5A). First, we evaluated the genetic correlation between established *ESR1*-associated phenotypes and pregnancy glycemic traits, including 0hGlu, GDM, and  $GDM_{AUC}$ . The *ESR1*-associated phenotypes were acquired by searching “*ESR1*” in the GWAS catalog,<sup>58</sup> and we downloaded the available full summary statistics. In total, GWAS summaries for 15 phenotypes were downloaded, encompassing traits such as height (GCST90018959), systolic blood pressure (GCST90018972), and pulse pressure (GCST90018970), among others (Table S7).

At a significance threshold of  $3.33E-3$  ( $= 0.05/15$ ), we observed two significant associations for 0hGlu, including systolic blood pressure (SBP,  $r_g = 0.2436 \pm 0.0694$ ,  $p$  value  $= 4.00E-04$ ) and diastolic blood pressure (DBP,  $r_g = 0.2586 \pm 0.0803$ ,  $p$  value  $= 1.30E-03$ ). Notably, for  $GDM_{AUC}$ , the two most associated phenotypes were also SBP ( $r_g = 0.185 \pm 0.070$ ,  $p$  value  $= 7.80E-03$ ) and DBP ( $r_g = 0.190 \pm 0.070$ ,  $p$  value  $= 6.30E-03$ ) (Table S8). While the phenotypic correlation between GDM and hypertension has been confirmed,<sup>59,60</sup> only limited studies have explored this correlation from a genetic perspective.

We also conducted a literature review to explore the potential influence of hypertension during pregnancy on blood glucose

levels, summarizing our findings into three pathways. Firstly, it may worsen insulin resistance, impeding insulin's capacity to transport glucose into cells effectively.<sup>61</sup> Secondly, hypertension may impact maternal vascular function and hemodynamics, thereby impairing the blood supply to the placenta and uterus, disrupting insulin metabolism.<sup>62</sup> Additionally, hypertension may lead to increased inflammation and oxidative stress, negatively affecting insulin sensitivity and secretion.<sup>63</sup> These factors collectively may result in elevated glycemic levels during pregnancy, increasing the risk of gestational diabetes.

### Mendelian randomization analysis

In this section, we investigated the causal effects of the associated GWAS phenotypes on pregnancy glycemic traits with variants associated with *ESR1*. Specifically, for each exposure phenotype, we identified all independently significant (ind.sig) variants ( $r^2 < 0.2$ ,  $p$  value  $< 5E-8$ ) within 50 kb on both sides of *ESR1* (chr6:151606672–152179619, GRCh38). This identified eight phenotypes with more than three ind.sig SNPs. Inference of phenotypes with fewer than three SNPs may lack power; therefore, we excluded the corresponding phenotypes. At the significant threshold of  $6.25E-3$  ( $= 0.05/8$ ), we observed three, zero, and one causal relationships for 0hGlu, GDM, and  $GDM_{AUC}$ , respectively (Figure 5B and Table S9). For 0hGlu, the most significant causality was observed in pulse pressure ( $p$  value  $= 2.14E-04$ ), followed by serum phosphate density ( $p$  value  $= 3.40E-03$ ) and appendicular lean mass ( $p$  value  $= 3.91E-03$ ). For  $GDM_{AUC}$ , the top two potentially causal phenotypes were height ( $p$  value  $= 4.51E-03$ ) and pulse pressure ( $p$  value  $= 9.41E-03$ ). The MR analysis highlighted the relationship between blood pressure and pregnancy glycemic traits in a causal manner, supposed by observations that women with chronic hypertension are more prone to developing GDM.<sup>64</sup>

To ensure the validity of our MR analysis, we examined the pleiotropic effects of instrumental variables and also performed a reverse MR analysis. We combined all instrumental variables across the exposure phenotypes and checked their GWAS  $p$  values relative to glycemic traits. We found no genome-wide significant signals with the smallest  $p$  value for rs488133- $GDM_{AUC}$  ( $p$  value  $= 0.050$ ). For the reverse MR analysis, we employed 0hGlu as the exposure variable and pulse pressure as the outcome variable and conducted a two-sample MR analysis using the R function *TwoSampleMR*.<sup>65</sup> The  $p$  value from the inverse variance weighted method was 0.250 ( $>0.05$ ), signifying the absence of reverse causality.

### Transcriptome-wide association study

TWASs can identify significant associations underlying genetically regulated genes and traits of interest.<sup>66,67</sup> We thus performed a TWAS analysis to investigate whether *ESR1* affects GDM by modulating its expressions (Figure S5 and Table S10). To predict the genetically regulated gene expression (GReX), we multiplied the independent significant *cis*-eQTL (expression quantitative trait loci) effects of *ESR1* by the corresponding genotype dosages in our dataset.

At the significance threshold of  $1.0E-03$  ( $= 0.05/49$ ), we identified 17, 0, and 2 tissues with potentially causal GReX on 0hGlu,

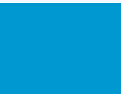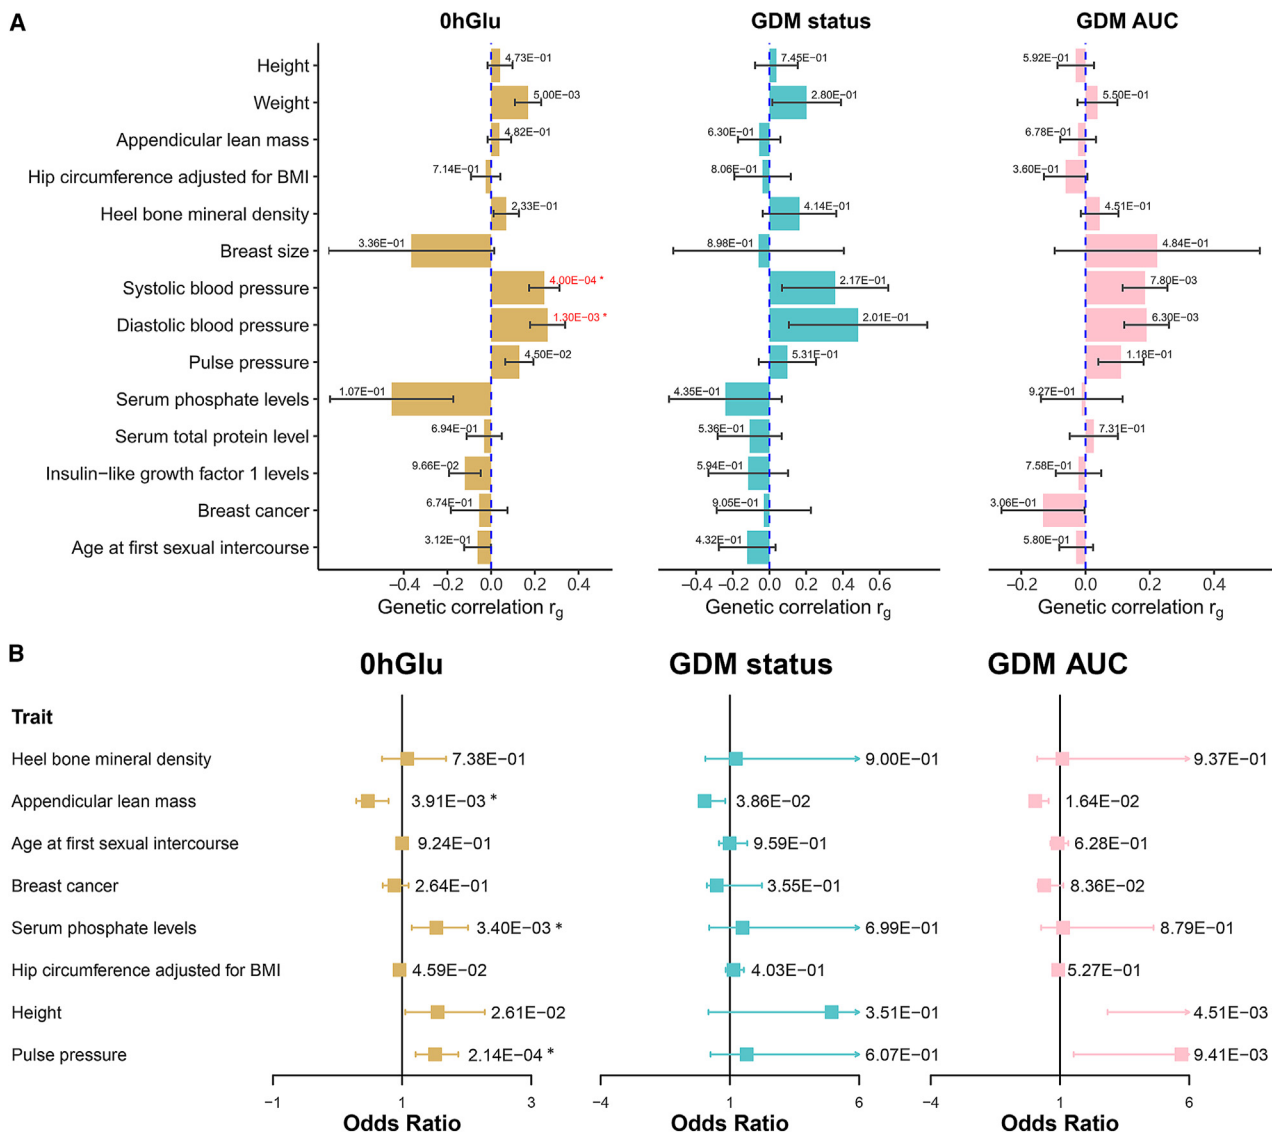

**Figure 5. Results of genetic correlation and Mendelian randomization between glycemic traits and *ESR1*-associated phenotypes from GWAS catalog**

(A) The bar plots indicate genetic correlation results. The value marked on each bar indicates the  $p$  value of the genetic correlation test.

(B) The forest plots indicate MR results. The value marked on each bar indicates the  $p$  value of the MR test, and the asterisks (\*) means that the  $p$  value has reached the Bonferroni corrected threshold  $6.25E-3$  ( $= 0.05/8$ ).

GDM, and  $GDM_{AUC}$ , respectively. The top three tissues for 0hGlu were brain basal ganglia ( $p$  value =  $1.69E-07$ ), artery tibial ( $p$  value =  $3.61E-07$ ), and cell-transformed fibroblasts ( $p$  value =  $5.00E-07$ ). For  $GDM_{AUC}$ , the two significant tissues were artery tibial ( $p$  value =  $1.81E-04$ ) and cell-transformed fibroblasts ( $p$  value =  $6.92E-04$ ). Here, we wish to underscore the hypothesis that *ESR1* plays a crucial role in influencing pregnancy glycemic traits through the regulation of gene expressions in the tibial artery. This is expected given the well-established association between diabetes and arterial disease.<sup>68–70</sup> Our study offers a potential pathway through which these two diseases may be interconnected.

### Significant overlap of GWAS loci and drug targets

The DTEA translates GWAS results into potential applications. Analysis of 19,365 genes and 10,722 drug gene sets, followed by filtering (STAR Methods), retained 1,072 drug gene sets from 66 classifications. At a significance threshold of  $7.58E-04$  and  $AUC > 0.5$ , we noted significant overlaps of 3, 0, and 6 Anatomical Therapeutic Chemical classifications for 0hGlu, GDM, and  $GDM_{AUC}$ , respectively. Notably, for  $GDM_{AUC}$ , significant associations were found with hypertension (C07A,  $p$  value =  $1.21E-07$ ; C08C,  $p$  value =  $7.01E-04$ ) and hypotension (C01C,  $p$  value =  $5.93E-05$ ) (Figure S6). This observation aligns with the genetic correlation and MR

analysis results, indicating a putative causal relationship between blood pressure and pregnancy glycemic traits. The potential utility of drug targets for hypertension in addressing hyperglycemia necessitates comprehensive evaluation through rigorous experimental and clinical trials.

## DISCUSSION

Glycemic traits during pregnancy play a crucial role in maternal and fetal health. Abnormal glycemic traits during pregnancy may indicate a risk of developing gestational diabetes, which can have adverse outcomes for both the mother and the baby. Understanding the genetic architecture of pregnancy glycemic traits is essential for facilitating the effective management of associated complications. In our study, we uncovered an associated signal, *ESR1*, which encodes an estrogen receptor known to play a significant role in metabolism and gestation. Our investigation revealed potential mechanisms through which *ESR1* was linked to pregnancy glycemic traits. One pathway involved its impact on blood pressure, while another pathway involved the regulation of gene expressions in the tibial artery. Further investigation is required to elucidate the underlying biological mechanisms involved in these associations.

In recent years, the rapid advancement of high-throughput multi-omics technologies has facilitated the acquisition of transcriptomics, proteomics, and metabolomics data from study participants. Numerous placental multi-omics studies have been conducted to identify biomarkers derived from diverse omics datasets and subsequently construct predictive models to distinguish women at high risk of pregnancy hyperglycemia.<sup>71–76</sup> While these analyses enable the identification of associated biomarkers from each omics data, the explanations of the underlying biological mechanisms and the genetic factors involved are still obscure. The integration of genomic data with other multi-omics data is essential for improving our understanding of disease etiology comprehensively. A TWAS offers an approach to integrate genomic and transcriptomic data, revealing disease-associated genes through the regulation of expressions.<sup>66</sup> Additionally, proteome-wide association study represents a novel method for detecting gene-phenotype associations mediated by alterations in protein function.<sup>77</sup> Metabolome-wide association study has unveiled associations between metabolic phenotypes and disease risk, taking into account metabolic quantitative trait loci.<sup>78</sup> We believe that the integrative analysis of genomic and other multi-omics data holds significant promise for providing a comprehensive exploration of the disease etiology of pregnancy hyperglycemia.

## Limitations of the study

While our study offered valuable insights into the genetic landscape of pregnancy glycemic traits, it is essential to acknowledge its limitations. First, despite the recruitment of nearly 40,000 participants, the valid sample size for the GWAS was limited to 14,000 due to the absence of laboratory measurements in 65% of the participants. Conducting a GWAS analysis requires larger sample sizes to achieve sufficient statistical power. Additionally, it's important to acknowledge that our sample collection was confined to Wuhan, central China, potentially

limiting the generalizability of our findings to the entire Chinese population. To address this, we are currently working on recruiting additional samples with both genotype and laboratory data from various regions across China. Simultaneously, we are planning a large-scale meta-analysis within the East Asian population. Second, while our analytical approaches have provided insights into how *ESR1* may influence glycemic traits during pregnancy, biological experiments remain the gold standard for validation. These experiments typically include mouse and cell models. However, our literature review revealed that knocking out the estrogen receptor (*ESR1*) can result in infertility in female mice,<sup>79,80</sup> which poses significant challenges for designing models to study glycemic traits in pregnant mice. We are actively pursuing ongoing efforts for future biological replication. Additionally, most of the GWAS hits are non-coding intronic variants, which complicates the direct inference of their functional consequences on glycemic traits. This adds another layer of complexity to experimental replication, as it is challenging to pinpoint the precise regulatory mechanisms affected by these non-coding variants in *ESR1*. Third, we acknowledge that the *ESR1*-associated phenotypes retrieved from the GWAS catalog predominantly originated from European populations. Despite our efforts to harmonize data on allele type and frequency, minimizing disparities in variants spectrum between European and East Asian populations, there may persist some bias in our results. Furthermore, we downloaded some *ESR1* associations from East Asian populations; however, they either did not provide full summary statistics<sup>81–84</sup> or had a limited number of signals that were subsequently excluded during harmonization.<sup>85,86</sup> We strive for undertaking robust replication studies involving larger East Asian populations to enhance the reliability of our findings. Fourth, we note that studying environmental factors alongside genetic analysis in GDM research is crucial. Environmental influences such as diet, lifestyle, and pollutants play a significant role in GDM development. Understanding these factors enhances our ability to predict, prevent, and manage GDM effectively, improving maternal and fetal health outcomes. Unfortunately, we did not include a questionnaire to gather data on environmental factors in this study, but we plan to collect these variables in future investigations.

## RESOURCE AVAILABILITY

### Lead contact

Further information and requests should be directed to and will be fulfilled by the lead contact Xin Jin ([jinxin@genomics.cn](mailto:jinxin@genomics.cn)).

### Materials availability

This study did not generate new unique reagents.

### Data and code availability

The data that support the findings of this study have been deposited into CNGB Sequence Archive (CNSA)<sup>87</sup> of China National GeneBank DataBase (CNGBdb)<sup>88</sup> with accession number CNP0003674 and can also be downloaded directly from <https://db.cngb.org/MANE.PheWeb/>. A summary of analysis software and tools were provided in [key resources table](#). All original code has been deposited at Zenodo and is publicly available through <https://doi.org/10.5281/zenodo.11614736>. Any additional information required to reanalyze the data reported in this paper is available from the [lead contact](#) upon request.

## ACKNOWLEDGMENTS

This study was supported by the Central Guidance on Local Science and Technology Development Fund of Hubei Province (2022BGE261), National Natural Science Foundation of China (32171441 and 32000398), Guangdong-Hong Kong Joint Laboratory on Immunological and Genetic Kidney Diseases (2019B121205005), Top Medical Young Talents (2019) of Hubei Province, Guangdong Provincial Key Laboratory of Genome Read and Write (2017B030301011), open project of BGI-Shenzhen, Shenzhen 518000 China (BGIRSZ20200008), and the China National GeneBank. We are grateful to Dr. Likuan Xiong for helpful discussions and assistance with external replication studies.

## AUTHOR CONTRIBUTIONS

A.Z. and X.J. conceived the study, designed the research program, and managed the project. H.X., M.Y., J. Zhou, Y. Zhou, J.L., Y. Zhong, Z.C., H.M., X.C., L.H., and R.Z. collected the data. L.L., X.L., and P.L. preprocessed the data and finished the quality control. H.Z., H.X., L.L., M.Y., Y.L., X.Z., X.Q., and J. Zeng performed the statistical analysis and results visualization. H.Z., H.X., L.L., M.Y., and Y.L. wrote the manuscript. All authors participated in revising the manuscript.

## DECLARATION OF INTERESTS

The authors declare no competing interests.

## STAR★METHODS

Detailed methods are provided in the online version of this paper and include the following:

- [KEY RESOURCES TABLE](#)
- [EXPERIMENTAL MODEL AND SUBJECT DETAILS](#)
  - Subjects
  - Phenotype
  - Maternal glycemic traits
- [METHOD DETAILS](#)
  - Whole-genome sequencing
  - Variants calling
  - Genotype imputation
- [QUANTIFICATION AND STATISTICAL ANALYSIS](#)
  - Regression analysis
  - Genome-wide association study
  - Protein-protein interaction and gene set enrichment analysis
  - Genetic correlation analysis
  - Mendelian randomization analysis
  - Transcriptome-wide association study
  - Drug target enrichment analysis

## SUPPLEMENTAL INFORMATION

Supplemental information can be found online at <https://doi.org/10.1016/j.xgen.2024.100631>.

Received: March 8, 2023

Revised: December 14, 2023

Accepted: July 17, 2024

Published: October 9, 2024

## REFERENCES

1. Sweeting, A., Wong, J., Murphy, H.R., and Ross, G.P. (2022). A Clinical Update on Gestational Diabetes Mellitus. *Endocr. Rev.* 43, 763–793. <https://doi.org/10.1210/edrv/bnac003>.
2. Dupuis, J., Langenberg, C., Prokopenko, I., Saxena, R., Soranzo, N., Jackson, A.U., Wheeler, E., Glazer, N.L., Bouatia-Naji, N., Gloyn, A.L., et al. (2010). New genetic loci implicated in fasting glucose homeostasis and their impact on type 2 diabetes risk. *Nat. Genet.* 42, 105–116. <https://doi.org/10.1038/ng.520>.
3. Manning, A.K., Hivert, M.F., Scott, R.A., Grimsby, J.L., Bouatia-Naji, N., Chen, H., Rybin, D., Liu, C.T., Bielak, L.F., Prokopenko, I., et al. (2012). A genome-wide approach accounting for body mass index identifies genetic variants influencing fasting glycemic traits and insulin resistance. *Nat. Genet.* 44, 659–669. <https://doi.org/10.1038/ng.2274>.
4. Chung, R.H., Chiu, Y.F., Wang, W.C., Hwu, C.M., Hung, Y.J., Lee, I.T., Chuang, L.M., Quertermous, T., Rotter, J.I., Chen, Y.D.I., et al. (2021). Multi-omics analysis identifies CpGs near G6PC2 mediating the effects of genetic variants on fasting glucose. *Diabetologia* 64, 1613–1625. <https://doi.org/10.1007/s00125-021-05449-9>.
5. Kwak, S.H., Kim, S.H., Cho, Y.M., Go, M.J., Cho, Y.S., Choi, S.H., Moon, M.K., Jung, H.S., Shin, H.D., Kang, H.M., et al. (2012). A genome-wide association study of gestational diabetes mellitus in Korean women. *Diabetes* 61, 531–541. <https://doi.org/10.2337/db11-1034>.
6. Hayes, M.G., Urbanek, M., Hivert, M.F., Armstrong, L.L., Morrison, J., Guo, C., Lowe, L.P., Scheftner, D.A., Pluzhnikov, A., Levine, D.M., et al. (2013). Identification of HKDC1 and BACE2 as genes influencing glycemic traits during pregnancy through genome-wide association studies. *Diabetes* 62, 3282–3291. <https://doi.org/10.2337/db12-1692>.
7. Zhen, J., Gu, Y., Wang, P., Wang, W., Bian, S., Huang, S., Liang, H., Huang, M., Yu, Y., Chen, Q., et al. (2024). Genome-wide association and Mendelian randomisation analysis among 30,699 Chinese pregnant women identifies novel genetic and molecular risk factors for gestational diabetes and glycaemic traits. *Diabetologia* 67, 703–713. <https://doi.org/10.1007/s00125-023-06065-5>.
8. Morisset, A.S., St-Yves, A., Veillette, J., Weisnagel, S.J., Tchernof, A., and Robitaille, J. (2010). Prevention of gestational diabetes mellitus: a review of studies on weight management. *Diabetes. Metab. Res. Rev.* 26, 17–25. <https://doi.org/10.1002/dmrr.1053>.
9. Reece, E.A. (2010). The fetal and maternal consequences of gestational diabetes mellitus. The journal of maternal-fetal & neonatal medicine : the official journal of the European Association of Perinatal Medicine, the Federation of Asia and Oceania Perinatal Societies. *J. Matern. Fetal Neonatal Med.* 23, 199–203. <https://doi.org/10.3109/14767050903550659>.
10. Petry, C.J. (2010). Gestational diabetes: risk factors and recent advances in its genetics and treatment. *Br. J. Nutr.* 104, 775–787. <https://doi.org/10.1017/s0007114510001741>.
11. Buchanan, T.A., Xiang, A.H., and Page, K.A. (2012). Gestational diabetes mellitus: risks and management during and after pregnancy. *Nat. Rev. Endocrinol.* 8, 639–649. <https://doi.org/10.1038/nrendo.2012.96>.
12. Kc, K., Shakya, S., and Zhang, H. (2015). Gestational diabetes mellitus and macrosomia: a literature review. *Ann. Nutr. Metab.* 66, 14–20. <https://doi.org/10.1159/000371628>.
13. Moses, R.G., Knights, S.J., Lucas, E.M., Moses, M., Russell, K.G., Coleman, K.J., and Davis, W.S. (2000). Gestational diabetes: is a higher cesarean section rate inevitable? *Diabetes Care* 23, 15–17. <https://doi.org/10.2337/diacare.23.1.15>.
14. Jiang, L., Tang, K., Magee, L.A., von Dadelszen, P., Ekeroma, A., Li, X., Zhang, E., and Bhutta, Z.A. (2022). A global view of hypertensive disorders and diabetes mellitus during pregnancy. *Nat. Rev. Endocrinol.* 18, 760–775. <https://doi.org/10.1038/s41574-022-00734-y>.
15. Benn, P., Borell, A., Chiu, R., Cuckle, H., Dugoff, L., Faas, B., Gross, S., Johnson, J., Maymon, R., Norton, M., et al. (2013). Position statement from the Aneuploidy Screening Committee on behalf of the Board of the International Society for Prenatal Diagnosis. *Prenat. Diagn.* 33, 622–629. <https://doi.org/10.1002/pd.4139>.

16. Shendure, J., Findlay, G.M., and Snyder, M.W. (2019). Genomic Medicine—Progress, Pitfalls, and Promise. *Cell* 177, 45–57. <https://doi.org/10.1016/j.cell.2019.02.003>.
17. Liu, S., Huang, S., Chen, F., Zhao, L., Yuan, Y., Francis, S.S., Fang, L., Li, Z., Lin, L., Liu, R., et al. (2018). Genomic Analyses from Non-invasive Prenatal Testing Reveal Genetic Associations, Patterns of Viral Infections, and Chinese Population History. *Cell* 175, 347–359.e14. <https://doi.org/10.1016/j.cell.2018.08.016>.
18. Liu, S., Huang, S., Liu, Y., Gu, Y., Lin, X., Zhu, H., Liu, H., Xu, Z., Cheng, S., Lan, X., et al. (2023). Utilizing Non-Invasive Prenatal Test Sequencing Data Resource for Human Genetic Investigation. Preprint at bioRxiv 56, 377. <https://doi.org/10.1101/2023.12.11.570976>.
19. Elliott, A., Walters, R.K., Pirinen, M., Kurki, M., Junna, N., Goldstein, J.I., Reeve, M.P., Siirtola, H., Lemmelä, S.M., Turley, P., et al. (2024). Distinct and shared genetic architectures of gestational diabetes mellitus and type 2 diabetes. *Nat. Genet.* 56, 377–382. <https://doi.org/10.1038/s41588-023-01607-4>.
20. Gao, C., Sun, X., Lu, L., Liu, F., and Yuan, J. (2019). Prevalence of gestational diabetes mellitus in mainland China: A systematic review and meta-analysis. *J. Diabetes Investig.* 10, 154–162. <https://doi.org/10.1111/jdi.12854>.
21. Powe, C.E. (2017). Early Pregnancy Biochemical Predictors of Gestational Diabetes Mellitus. *Curr. Diabetes Rep.* 17, 12. <https://doi.org/10.1007/s11892-017-0834-y>.
22. Falcone, V., Kotzaeridi, G., Breil, M.H., Rosicky, I., Stopp, T., Yerlikaya-Schatten, G., Feichtinger, M., Eppel, W., Husslein, P., Tura, A., and Göbl, C.S. (2019). Early Assessment of the Risk for Gestational Diabetes Mellitus: Can Fasting Parameters of Glucose Metabolism Contribute to Risk Prediction? *Diabetes Metab. J.* 43, 785–793. <https://doi.org/10.4093/dmj.2018.0218>.
23. Omazić, J., Viljetić, B., Ivić, V., Kadić, M., Zibar, L., Müller, A., and Wagner, J. (2021). Early markers of gestational diabetes mellitus: what we know and which way forward? *Biochem. Med.* 31, 030502. <https://doi.org/10.11613/bm.2021.030502>.
24. Liu, M., Chen, Y., and Chen, D. (2020). Association between transthyretin concentrations and gestational diabetes mellitus in Chinese women. *Arch. Gynecol. Obstet.* 302, 329–335. <https://doi.org/10.1007/s00404-020-05599-y>.
25. Luo, C., Li, Z., Lu, Y., Wei, F., Suo, D., Lan, S., Ren, Z., Jiang, R., Huang, F., Chen, A., et al. (2022). Association of serum vitamin D status with gestational diabetes mellitus and other laboratory parameters in early pregnant women. *BMC Pregnancy Childbirth* 22, 400. <https://doi.org/10.1186/s12884-022-04725-9>.
26. Alanbay, I., Coksuer, H., Ercan, M., Keskin, U., Karasahin, E., Ozturk, M., Tapan, S., Ozturk, O., Kurt, I., and Ergun, A. (2012). Can serum gamma-glutamyltransferase levels be useful at diagnosing gestational diabetes mellitus? *Gynecol. Endocrinol.* 28, 208–211. <https://doi.org/10.3109/09513590.2011.588756>.
27. Kong, M., Liu, C., Guo, Y., Gao, Q., Zhong, C., Zhou, X., Chen, R., Xiong, G., Yang, X., Hao, L., and Yang, N. (2018). Higher level of GGT during mid-pregnancy is associated with increased risk of gestational diabetes mellitus. *Clin. Endocrinol.* 88, 700–705. <https://doi.org/10.1111/cen.13558>.
28. Khan, F.Y., Kauser, H., Palakeel, J.J., Ali, M., Chhabra, S., Lamsal Lamichhane, S., Opara, C.O., and Hanif, A. (2022). Role of Uric Acid Levels in the Development of Gestational Diabetes Mellitus: A Review. *Cureus* 14, e31057. <https://doi.org/10.7759/cureus.31057>.
29. Yue, C., Ying, C., and Li, X. (2023). Elevated Serum Uric Acid Is Associated With Gestational Diabetes Mellitus: An Observational Cohort Study. *J. Clin. Endocrinol. Metab.* 108, e480–e486. <https://doi.org/10.1210/clinem/dgac760>.
30. Schneider, S., Freerksen, N., Röhrig, S., Hoeff, B., and Maul, H. (2012). Gestational diabetes and preeclampsia—similar risk factor profiles? *Early Hum. Dev.* 88, 179–184. <https://doi.org/10.1016/j.earlhumdev.2011.08.004>.
31. Yang, Y., and Wu, N. (2022). Gestational Diabetes Mellitus and Preeclampsia: Correlation and Influencing Factors. *Front. Cardiovasc. Med.* 9, 831297. <https://doi.org/10.3389/fcvm.2022.831297>.
32. Xiao, H., Li, L., Yang, M., Zeng, J., Zhou, J., Tao, Y., Zhou, Y., Cai, M., Liu, J., Huang, Y., et al. (2023). Genetic analysis of 104 pregnancy phenotypes in 39,194 Chinese women. Preprint at medRxiv 56, 377. <https://doi.org/10.1101/2023.11.23.23298979>.
33. (2023). MANE pheweb. <https://db.cngb.org/MANE.PheWeb/>.
34. Kanai, M., Akiyama, M., Takahashi, A., Matoba, N., Momozawa, Y., Ikeda, M., Iwata, N., Ikegawa, S., Hirata, M., Matsuda, K., et al. (2018). Genetic analysis of quantitative traits in the Japanese population links cell types to complex human diseases. *Nat. Genet.* 50, 390–400. <https://doi.org/10.1038/s41588-018-0047-6>.
35. Sinnott-Armstrong, N., Tanigawa, Y., Amar, D., Mars, N., Benner, C., Aguirre, M., Venkataraman, G.R., Wainberg, M., Ollila, H.M., Kiiskinen, T., et al. (2021). Genetics of 35 blood and urine biomarkers in the UK Biobank. *Nat. Genet.* 53, 185–194. <https://doi.org/10.1038/s41588-020-00757-z>.
36. Richardson, T.G., Leyden, G.M., Wang, Q., Bell, J.A., Elsworth, B., Davey Smith, G., and Holmes, M.V. (2022). Characterising metabolomic signatures of lipid-modifying therapies through drug target mendelian randomisation. *PLoS Biol.* 20, e3001547. <https://doi.org/10.1371/journal.pbio.3001547>.
37. Pervjakova, N., Moen, G.H., Borges, M.C., Ferreira, T., Cook, J.P., Allard, C., Beaumont, R.N., Canouil, M., Hatem, G., Heiskala, A., et al. (2022). Multi-ancestry genome-wide association study of gestational diabetes mellitus highlights genetic links with type 2 diabetes. *Hum. Mol. Genet.* 31, 3377–3391. <https://doi.org/10.1093/hmg/ddac050>.
38. Changalidis, A.I., Maksiutenko, E.M., Barbitoff, Y.A., Tkachenko, A.A., Vashukova, E.S., Pachullia, O.V., Nasykhova, Y.A., and Glotov, A.S. (2022). Aggregation of Genome-Wide Association Data from FinnGen and UK Biobank Replicates Multiple Risk Loci for Pregnancy Complications. *Genes* 13, 2255. <https://doi.org/10.3390/genes13122255>.
39. Pascoe, L., Tura, A., Patel, S.K., Ibrahim, I.M., Ferrannini, E., Zeggini, E., Weedon, M.N., Mari, A., Hattersley, A.T., McCarthy, M.I., et al. (2007). Common variants of the novel type 2 diabetes genes CDKAL1 and HHEX/IDE are associated with decreased pancreatic beta-cell function. *Diabetes* 56, 3101–3104. <https://doi.org/10.2337/db07-0634>.
40. Steinthorsdottir, V., Thorleifsson, G., Reynisdottir, I., Benediktsson, R., Jonsdottir, T., Walters, G.B., Styrkarsdottir, U., Gretarsdottir, S., Emilsson, V., Ghosh, S., et al. (2007). A variant in CDKAL1 influences insulin response and risk of type 2 diabetes. *Nat. Genet.* 39, 770–775. <https://doi.org/10.1038/ng2043>.
41. Rubio-Sastre, P., Scheer, F.A.J.L., Gómez-Abellán, P., Madrid, J.A., and Garaulet, M. (2014). Acute melatonin administration in humans impairs glucose tolerance in both the morning and evening. *Sleep* 37, 1715–1719. <https://doi.org/10.5665/sleep.4088>.
42. Spracklen, C.N., Horikoshi, M., Kim, Y.J., Lin, K., Bragg, F., Moon, S., Suzuki, K., Tam, C.H.T., Tabara, Y., Kwak, S.H., et al. (2020). Identification of type 2 diabetes loci in 433,540 East Asian individuals. *Nature* 582, 240–245. <https://doi.org/10.1038/s41586-020-2263-3>.
43. Suzuki, K., Akiyama, M., Ishigaki, K., Kanai, M., Hosoe, J., Shojima, N., Hozawa, A., Kadota, A., Kuriki, K., Naito, M., et al. (2019). Identification of 28 new susceptibility loci for type 2 diabetes in the Japanese population. *Nat. Genet.* 51, 379–386. <https://doi.org/10.1038/s41588-018-0332-4>.
44. Sun, J.W., Collins, J.M., Ling, D., and Wang, D. (2019). Highly Variable Expression of ESR1 Splice Variants in Human Liver: Implication in the Liver Gene Expression Regulation and Inter-Person Variability in Drug Metabolism and Liver Related Diseases. *J. Mol. Genet. Med.* 13, 434.

45. Giambartolomei, C., Zhenli Liu, J., Zhang, W., Hauberg, M., Shi, H., Boockock, J., Pickrell, J., Jaffe, A.E., CommonMind Consortium; Pasianic, B., and Roussos, P. (2018). A Bayesian framework for multiple trait colocalization from summary association statistics. *Bioinformatics* 34, 2538–2545. <https://doi.org/10.1093/bioinformatics/bty147>.
46. Wallace, C. (2020). Eliciting priors and relaxing the single causal variant assumption in colocalisation analyses. *PLoS Genet.* 16, e1008720. <https://doi.org/10.1371/journal.pgen.1008720>.
47. Liu, B., Gloudemans, M.J., Rao, A.S., Ingelsson, E., and Montgomery, S.B. (2019). Abundant associations with gene expression complicate GWAS follow-up. *Nat. Genet.* 51, 768–769. <https://doi.org/10.1038/s41588-019-0404-0>.
48. Bahía, W., Soltani, I., Haddad, A., Soua, A., Radhouani, A., Mahdhi, A., and Ferchichi, S. (2020). Association of genetic variants in Estrogen receptor (ESR)1 and ESR2 with susceptibility to recurrent pregnancy loss in Tunisian women: A case control study. *Gene* 736, 144406. <https://doi.org/10.1016/j.gene.2020.144406>.
49. El-Beshbishy, H.A., Tawfeek, M.A., Al-Azhary, N.M., Mariah, R.A., Habib, F.A., Aljayar, L., and Alahmadi, A.F. (2015). Estrogen Receptor Alpha (ESR1) Gene Polymorphisms in Pre-eclamptic Saudi Patients. *Pakistan J. Med. Sci.* 31, 880–885. <https://doi.org/10.12669/pjms.314.7541>.
50. Berkane, N., Liere, P., Oudinet, J.P., Hertig, A., Lefèvre, G., Pluchino, N., Schumacher, M., and Chabbert-Buffet, N. (2017). From Pregnancy to Preeclampsia: A Key Role for Estrogens. *Endocr. Rev.* 38, 123–144. <https://doi.org/10.1210/er.2016-1065>.
51. Landrum, M.J., Lee, J.M., Benson, M., Brown, G.R., Chao, C., Chitpiralla, S., Gu, B., Hart, J., Hoffman, D., Jang, W., et al. (2018). ClinVar: improving access to variant interpretations and supporting evidence. *Nucleic Acids Res.* 46, D1062–D1067. <https://doi.org/10.1093/nar/gkx1153>.
52. Bernard, V., Kherra, S., Francou, B., Fagart, J., Viengchareun, S., Guéchet, J., Ladjouze, A., Guiochon-Mantel, A., Korach, K.S., Binart, N., et al. (2017). Familial Multiplicity of Estrogen Insensitivity Associated With a Loss-of-Function ESR1 Mutation. *J. Clin. Endocrinol. Metab.* 102, 93–99. <https://doi.org/10.1210/jc.2016-2749>.
53. Toy, W., Shen, Y., Won, H., Green, B., Sakr, R.A., Will, M., Li, Z., Gala, K., Fanning, S., King, T.A., et al. (2013). ESR1 ligand-binding domain mutations in hormone-resistant breast cancer. *Nat. Genet.* 45, 1439–1445. <https://doi.org/10.1038/ng.2822>.
54. Yan, H., Yang, W., Zhou, F., Li, X., Pan, Q., Shen, Z., Han, G., Newell-Fugate, A., Tian, Y., Majeti, R., et al. (2019). Estrogen Improves Insulin Sensitivity and Suppresses Gluconeogenesis via the Transcription Factor Foxo1. *Diabetes* 68, 291–304. <https://doi.org/10.2337/db18-0638>.
55. Yoh, K., Ikeda, K., Horie, K., and Inoue, S. (2023). Roles of Estrogen, Estrogen Receptors, and Estrogen-Related Receptors in Skeletal Muscle: Regulation of Mitochondrial Function. *Int. J. Mol. Sci.* 24, 1853. <https://doi.org/10.3390/ijms24031853>.
56. Yuasa, T., Takata, Y., Aki, N., Kunimi, K., Satoh, M., Nii, M., Izumi, Y., Otoda, T., Hashida, S., Osawa, H., and Aihara, K.I. (2021). Insulin receptor cleavage induced by estrogen impairs insulin signaling. *BMJ Open Diabetes Res. Care* 9, e002467. <https://doi.org/10.1136/bmjdr-2021-002467>.
57. Kelleher, A.M., DeMayo, F.J., and Spencer, T.E. (2019). Uterine Glands: Developmental Biology and Functional Roles in Pregnancy. *Endocr. Rev.* 40, 1424–1445. <https://doi.org/10.1210/er.2018-00281>.
58. Sollis, E., Mosaku, A., Abid, A., Buniello, A., Cerezo, M., Gil, L., Groza, T., Güneş, O., Hall, P., Hayhurst, J., et al. (2023). The NHGRI-EBI GWAS Catalog: knowledgebase and deposition resource. *Nucleic Acids Res.* 51, D977–D985. <https://doi.org/10.1093/nar/gkac1010>.
59. Birukov, A., Glinborg, D., Schulze, M.B., Jensen, T.K., Kuxhaus, O., Andersen, L.B., Kräker, K., Polemiti, E., Jensen, B.L., Jørgensen, J.S., et al. (2022). Elevated blood pressure in pregnant women with gestational diabetes according to the WHO criteria: importance of overweight. *J. Hypertens.* 40, 1614–1623. <https://doi.org/10.1097/hjh.0000000000003196>.
60. Hedderson, M.M., and Ferrara, A. (2008). High blood pressure before and during early pregnancy is associated with an increased risk of gestational diabetes mellitus. *Diabetes Care* 31, 2362–2367. <https://doi.org/10.2337/dc08-1193>.
61. Salvetti, A., Brogi, G., Di Legge, V., and Bernini, G.P. (1993). The inter-relationship between insulin resistance and hypertension. *Drugs* 46, 149–159. <https://doi.org/10.2165/00003495-199300462-00024>.
62. Scioscia, M., Gumaa, K., Kunjara, S., Paine, M.A., Selvaggi, L.E., Roddeck, C.H., and Rademacher, T.W. (2006). Insulin resistance in human preeclamptic placenta is mediated by serine phosphorylation of insulin receptor substrate-1 and -2. *J. Clin. Endocrinol. Metab.* 91, 709–717. <https://doi.org/10.1210/jc.2005-1965>.
63. Zhou, M.S., Wang, A., and Yu, H. (2014). Link between insulin resistance and hypertension: What is the evidence from evolutionary biology? *Diabetol. Metab. Syndrome* 6, 12. <https://doi.org/10.1186/1758-5996-6-12>.
64. Leon, M.G., Moussa, H.N., Longo, M., Pedroza, C., Haidar, Z.A., Mendez-Figueroa, H., Blackwell, S.C., and Sibai, B.M. (2016). Rate of Gestational Diabetes Mellitus and Pregnancy Outcomes in Patients with Chronic Hypertension. *Am. J. Perinatol.* 33, 745–750. <https://doi.org/10.1055/s-0036-1571318>.
65. Hemani, G., Zheng, J., Elsworth, B., Wade, K.H., Haberland, V., Baird, D., Laurin, C., Burgess, S., Bowden, J., Langdon, R., et al. (2018). The MR-Base platform supports systematic causal inference across the human phenome. *Elife* 7, e34408. <https://doi.org/10.7554/eLife.34408>.
66. Gamazon, E.R., Wheeler, H.E., Shah, K.P., Mozaffari, S.V., Aquino-Michaels, K., Carroll, R.J., Eyler, A.E., Denny, J.C., GTEx Consortium; and Nicolae, D.L., et al. (2015). A gene-based association method for mapping traits using reference transcriptome data. *Nat. Genet.* 47, 1091–1098. <https://doi.org/10.1038/ng.3367>.
67. Gusev, A., Ko, A., Shi, H., Bhatia, G., Chung, W., Penninx, B.W.J.H., Jansen, R., de Geus, E.J.C., Boomsma, D.I., Wright, F.A., et al. (2016). Integrative approaches for large-scale transcriptome-wide association studies. *Nat. Genet.* 48, 245–252. <https://doi.org/10.1038/ng.3506>.
68. American Diabetes Association (2003). Peripheral arterial disease in people with diabetes. *Diabetes Care* 26, 3333–3341. <https://doi.org/10.2337/diacare.26.12.3333>.
69. Forsythe, R.O., Apelqvist, J., Boyko, E.J., Fitridge, R., Hong, J.P., Katsanos, K., Mills, J.L., Nikol, S., Reekers, J., Venermo, M., et al. (2020). Effectiveness of bedside investigations to diagnose peripheral artery disease among people with diabetes mellitus: A systematic review. *Diabetes. Metab. Res. Rev.* 36, e3277. <https://doi.org/10.1002/dmrr.3277>.
70. Tsuchiya, M., Suzuki, E., Egawa, K., Nishio, Y., Maegawa, H., Inoue, S., Mitsunami, K., Morikawa, S., Inubushi, T., and Kashiwagi, A. (2004). Stiffness and impaired blood flow in lower-leg arteries are associated with severity of coronary artery calcification among asymptomatic type 2 diabetic patients. *Diabetes Care* 27, 2409–2415. <https://doi.org/10.2337/diacare.27.10.2409>.
71. Tang, L., Li, P., and Li, L. (2020). Whole transcriptome expression profiles in placenta samples from women with gestational diabetes mellitus. *J. Diabetes Investig.* 11, 1307–1317. <https://doi.org/10.1111/jdi.13250>.
72. Assi, E., D'Addio, F., Mandò, C., Maestroni, A., Loretelli, C., Ben Nasr, M., Uselli, V., Abdelsalam, A., Seelam, A.J., Pastore, I., et al. (2020). Placental proteome abnormalities in women with gestational diabetes and large-for-gestational-age newborns. *BMJ Open Diabetes Res. Care* 8, e001586. <https://doi.org/10.1136/bmjdr-2020-001586>.
73. Wang, Q.Y., You, L.H., Xiang, L.L., Zhu, Y.T., and Zeng, Y. (2021). Current progress in metabolomics of gestational diabetes mellitus. *World J. Diabetes* 12, 1164–1186. <https://doi.org/10.4239/wjdv12.i8.1164>.
74. Pineda-Cortel, M.R.B., Bunag, J.A.A., Mamerto, T.P., and Abulencia, M.F.B. (2021). Differential gene expression and network-based analyses of the placental transcriptome reveal distinct potential biomarkers for gestational diabetes mellitus. *Diabetes Res. Clin. Pract.* 180, 109046. <https://doi.org/10.1016/j.diabres.2021.109046>.

75. Sriboonvorakul, N., Hu, J., Boriboonhirunsarn, D., Ng, L.L., and Tan, B.K. (2022). Proteomics Studies in Gestational Diabetes Mellitus: A Systematic Review and Meta-Analysis. *J. Clin. Med.* *11*, 2737. <https://doi.org/10.3390/jcm11102737>.
76. Razo-Azamar, M., Nambo-Venegas, R., Meraz-Cruz, N., Guevara-Cruz, M., Ibarra-González, I., Vela-Amieva, M., Delgadillo-Velázquez, J., Santiago, X.C., Escobar, R.F., Vadillo-Ortega, F., and Palacios-González, B. (2023). An early prediction model for gestational diabetes mellitus based on metabolomic biomarkers. *Diabetol. Metab. Syndrome* *15*, 116. <https://doi.org/10.1186/s13098-023-01098-7>.
77. Brandes, N., Linial, N., and Linial, M. (2020). PWAS: proteome-wide association study-linking genes and phenotypes by functional variation in proteins. *Genome Biol.* *21*, 173. <https://doi.org/10.1186/s13059-020-02089-x>.
78. Wang, C., Qin, N., Zhu, M., Chen, M., Xie, K., Cheng, Y., Dai, J., Liu, J., Xia, Y., Ma, H., et al. (2017). Metabolome-wide association study identified the association between a circulating polyunsaturated fatty acids variant rs174548 and lung cancer. *Carcinogenesis* *38*, 1147–1154. <https://doi.org/10.1093/carcin/bgx084>.
79. Singh, S.P., Wolfe, A., Ng, Y., DiVall, S.A., Buggs, C., Levine, J.E., Wondisford, F.E., and Radovick, S. (2009). Impaired estrogen feedback and infertility in female mice with pituitary-specific deletion of estrogen receptor alpha (ESR1). *Biol. Reprod.* *81*, 488–496. <https://doi.org/10.1095/bioreprod.108.075259>.
80. Nalvarte, I., and Antonson, P. (2023). Estrogen Receptor Knockout Mice and Their Effects on Fertility. *Receptors* *2*, 116–126. <https://doi.org/10.3390/receptors2010007>.
81. Han, M.R., Long, J., Choi, J.Y., Low, S.K., Kweon, S.S., Zheng, Y., Cai, Q., Shi, J., Guo, X., Matsuo, K., et al. (2016). Genome-wide association study in East Asians identifies two novel breast cancer susceptibility loci. *Hum. Mol. Genet.* *25*, 3361–3371. <https://doi.org/10.1093/hmg/ddw164>.
82. Ishigaki, K., Akiyama, M., Kanai, M., Takahashi, A., Kawakami, E., Sugishita, H., Sakaue, S., Matoba, N., Low, S.K., Okada, Y., et al. (2020). Large-scale genome-wide association study in a Japanese population identifies novel susceptibility loci across different diseases. *Nat. Genet.* *52*, 669–679. <https://doi.org/10.1038/s41588-020-0640-3>.
83. Yengo, L., Vedantam, S., Marouli, E., Sidorenko, J., Bartell, E., Sakaue, S., Graff, M., Eliassen, A.U., Jiang, Y., Raghavan, S., et al. (2022). A saturated map of common genetic variants associated with human height. *Nature* *610*, 704–712. <https://doi.org/10.1038/s41586-022-05275-y>.
84. Zheng, W., Long, J., Gao, Y.T., Li, C., Zheng, Y., Xiang, Y.B., Wen, W., Levy, S., Deming, S.L., Haines, J.L., et al. (2009). Genome-wide association study identifies a new breast cancer susceptibility locus at 6q25.1. *Nat. Genet.* *41*, 324–328. <https://doi.org/10.1038/ng.318>.
85. Lee, J.Y., Kim, J., Kim, S.W., Park, S.K., Ahn, S.H., Lee, M.H., Suh, Y.J., Noh, D.Y., Son, B.H., Cho, Y.U., et al. (2018). BRCA1/2-negative, high-risk breast cancers (BRCAx) for Asian women: genetic susceptibility loci and their potential impacts. *Sci. Rep.* *8*, 15263. <https://doi.org/10.1038/s41598-018-31859-8>.
86. Sakaue, S., Kanai, M., Tanigawa, Y., Karjalainen, J., Kurki, M., Koshiba, S., Narita, A., Konuma, T., Yamamoto, K., Akiyama, M., et al. (2021). A cross-population atlas of genetic associations for 220 human phenotypes. *Nat. Genet.* *53*, 1415–1424. <https://doi.org/10.1038/s41588-021-00931-x>.
87. Guo, X., Chen, F., Gao, F., Li, L., Liu, K., You, L., Hua, C., Yang, F., Liu, W., Peng, C., et al. (2020). CNSA: a data repository for archiving omics data. *Database* *2020*, baaa055. <https://doi.org/10.1093/database/baaa055>.
88. Chen, F.Z., You, L.J., Yang, F., Wang, L.N., Guo, X.Q., Gao, F., Hua, C., Tan, C., Fang, L., Shan, R.Q., et al. (2020). CNGBdb: China National GeneBank DataBase. *Yi Chuan* *42*, 799–809. <https://doi.org/10.16288/j.ycz.20-080>.
89. Barbeira, A.N., Melia, O., Liang, Y., Bonazzola, R., Wang, G., Wheeler, H., Aguet, F., Ardlie, K., Wen, X., and Im, H.K. (2021). CTIMP models on GTEx v8[Data set]. Zenodo. <https://doi.org/10.5281/zenodo.5709385>.
90. de Leeuw, C.A., Mooij, J.M., Heskes, T., and Posthuma, D. (2015). MAGMA: generalized gene-set analysis of GWAS data. *PLoS Comput. Biol.* *11*, e1004219. <https://doi.org/10.1371/journal.pcbi.1004219>.
91. Freshour, S.L., Kiwala, S., Cotto, K.C., Coffman, A.C., McMichael, J.F., Song, J.J., Griffith, M., Griffith, O.L., and Wagner, A.H. (2021). Integration of the Drug-Gene Interaction Database (DGIdb 4.0) with open crowd-source efforts. *Nucleic Acids Res.* *49*, D1144–D1151. <https://doi.org/10.1093/nar/gkaa1084>.
92. Piñero, J., Bravo, À., Queralt-Rosinach, N., Gutiérrez-Sacristán, A., Deupons, J., Centeno, E., García-García, J., Sanz, F., and Furlong, L.I. (2017). DisGeNET: a comprehensive platform integrating information on human disease-associated genes and variants. *Nucleic Acids Res.* *45*, D833–D839. <https://doi.org/10.1093/nar/gkw943>.
93. Li, H., and Durbin, R. (2009). Fast and accurate short read alignment with Burrows-Wheeler transform. *Bioinformatics* *25*, 1754–1760. <https://doi.org/10.1093/bioinformatics/btp324>.
94. Danecek, P., Bonfield, J.K., Liddle, J., Marshall, J., Ohan, V., Pollard, M.O., Whitwham, A., Keane, T., McCarthy, S.A., Davies, R.M., and Li, H. (2021). Twelve years of SAMtools and BCFtools. *GigaScience* *10*, giab008. <https://doi.org/10.1093/gigascience/giab008>.
95. McKenna, A., Hanna, M., Banks, E., Sivachenko, A., Cibulskis, K., Kernytsky, A., Garimella, K., Altshuler, D., Gabriel, S., Daly, M., and DePristo, M.A. (2010). The Genome Analysis Toolkit: a MapReduce framework for analyzing next-generation DNA sequencing data. *Genome Res.* *20*, 1297–1303. <https://doi.org/10.1101/gr.107524.110>.
96. Davies, R.W., Flint, J., Myers, S., and Mott, R. (2016). Rapid genotype imputation from sequence without reference panels. *Nat. Genet.* *48*, 965–969. <https://doi.org/10.1038/ng.3594>.
97. Chang, C.C., Chow, C.C., Tellier, L.C., Vattikuti, S., Purcell, S.M., and Lee, J.J. (2015). Second-generation PLINK: rising to the challenge of larger and richer datasets. *GigaScience* *4*, 7. <https://doi.org/10.1186/s13742-015-0047-8>.
98. Bulik-Sullivan, B.K., Loh, P.R., Finucane, H.K., Ripke, S., Yang, J., Schizophrenia Working Group of the Psychiatric Genomics Consortium; Patterson, N., Daly, M.J., Price, A.L., and Neale, B.M. (2015). LD Score regression distinguishes confounding from polygenicity in genome-wide association studies. *Nat. Genet.* *47*, 291–295. <https://doi.org/10.1038/ng.3211>.
99. Zhou, Y., Zhou, B., Pache, L., Chang, M., Khodabakhshi, A.H., Tanaseichuk, O., Benner, C., and Chanda, S.K. (2019). Metascape provides a biologist-oriented resource for the analysis of systems-level datasets. *Nat. Commun.* *10*, 1523. <https://doi.org/10.1038/s41467-019-09234-6>.
100. Szklarczyk, D., Kirsch, R., Koutrouli, M., Nastou, K., Mehryary, F., Hachilif, R., Gable, A.L., Fang, T., Doncheva, N.T., Pyysalo, S., et al. (2023). The STRING database in 2023: protein-protein association networks and functional enrichment analyses for any sequenced genome of interest. *Nucleic Acids Res.* *51*, D638–D646. <https://doi.org/10.1093/nar/gkac1000>.
101. Hinrichs, A.S., Karolchik, D., Baertsch, R., Barber, G.P., Bejerano, G., Clawson, H., Diekhans, M., Furey, T.S., Harte, R.A., Hsu, F., et al. (2006). The UCSC Genome Browser Database: update 2006. *Nucleic Acids Res.* *34*, D590–D598. <https://doi.org/10.1093/nar/gkj144>.
102. International Association of Diabetes and Pregnancy Study Groups Consensus Panel; Metzger, B.E., Gabbe, S.G., Persson, B., Buchanan, T.A., Catalano, P.A., Damm, P., Dyer, A.R., Leiva, A.d., Hod, M., et al. (2010). International association of diabetes and pregnancy study groups recommendations on the diagnosis and classification of hyperglycemia in pregnancy. *Diabetes Care* *33*, 676–682. <https://doi.org/10.2337/dc09-1848>.
103. Zhang, C., Wei, Y., Sun, W., and Yang, H. (2019). The Area under the Curve (AUC) of Oral Glucose Tolerance Test (OGTT) Could Be a Measure

- Method of Hyperglycemia in All Pregnant Women. *Open J. Obstet. Gynecol.* 09, 186–195. <https://doi.org/10.4236/ojog.2019.92019>.
104. Sakaguchi, K., Takeda, K., Maeda, M., Ogawa, W., Sato, T., Okada, S., Ohnishi, Y., Nakajima, H., and Kashiwagi, A. (2016). Glucose area under the curve during oral glucose tolerance test as an index of glucose intolerance. *Diabetol. Int.* 7, 53–58. <https://doi.org/10.1007/s13340-015-0212-4>.
  105. Deng, C., Liu, J., Liu, S., Liu, H., Bai, T., Jing, X., Xia, T., Liu, Y., Cheng, J., Wei, X., et al. (2023). Maternal and fetal factors influencing fetal fraction: A retrospective analysis of 153,306 pregnant women undergoing noninvasive prenatal screening. *Front. Pediatr.* 11, 1066178. <https://doi.org/10.3389/fped.2023.1066178>.
  106. Wang, E., Batey, A., Struble, C., Musci, T., Song, K., and Oliphant, A. (2013). Gestational age and maternal weight effects on fetal cell-free DNA in maternal plasma. *Prenat. Diagn.* 33, 662–666. <https://doi.org/10.1002/pd.4119>.
  107. ShujiaHuang. basevar (GitHub). <https://github.com/ShujiaHuang/basevar>.
  108. Fairley, S., Lowy-Gallego, E., Perry, E., and Flicek, P. (2020). The International Genome Sample Resource (IGSR) collection of open human genomic variation resources. *Nucleic Acids Res.* 48, D941–D947. <https://doi.org/10.1093/nar/gkz836>.
  109. Wray, N.R., and Visscher, P.M. (2008). Estimating Trait Heritability. *Nat. Educ.* 1, 29.
  110. Grindrod, P., and Kibble, M. (2004). Review of uses of network and graph theory concepts within proteomics. *Expert Rev. Proteomics* 1, 229–238. <https://doi.org/10.1586/14789450.1.2.229>.
  111. Wang, L., Jia, P., Wolfinger, R.D., Chen, X., and Zhao, Z. (2011). Gene set analysis of genome-wide association studies: methodological issues and perspectives. *Genomics* 98, 1–8. <https://doi.org/10.1016/j.ygeno.2011.04.006>.
  112. Bulik-Sullivan, B., Finucane, H.K., Anttila, V., Gusev, A., Day, F.R., Loh, P.R., ReproGen Consortium; Psychiatric Genomics Consortium; Genetic Consortium for Anorexia Nervosa of the Wellcome Trust Case Control Consortium 3; and Duncan, L., et al. (2015). An atlas of genetic correlations across human diseases and traits. *Nat. Genet.* 47, 1236–1241. <https://doi.org/10.1038/ng.3406>.
  113. Davey Smith, G., and Hemani, G. (2014). Mendelian randomization: genetic anchors for causal inference in epidemiological studies. *Hum. Mol. Genet.* 23, R89–R98. <https://doi.org/10.1093/hmg/ddu328>.
  114. Hu, Y., Li, M., Lu, Q., Weng, H., Wang, J., Zekavat, S.M., Yu, Z., Li, B., Gu, J., Muchnik, S., et al. (2019). A statistical framework for cross-tissue transcriptome-wide association analysis. *Nat. Genet.* 51, 568–576. <https://doi.org/10.1038/s41588-019-0345-7>.
  115. Loscalzo, J. (2012). Personalized cardiovascular medicine and drug development: time for a new paradigm. *Circulation* 125, 638–645. <https://doi.org/10.1161/circulationaha.111.089243>.
  116. Gaspar, H.A., and Breen, G. (2017). Drug enrichment and discovery from schizophrenia genome-wide association results: an analysis and visualisation approach. *Sci. Rep.* 7, 12460. <https://doi.org/10.1038/s41598-017-12325-3>.
  117. WHO (2023). Collaborating Centre for Drug Statistics Methodology. <https://www.whocc.no/>.
  118. WHO (2023). Anatomical Therapeutic Chemical (ATC) Classification. <https://www.who.int/tools/atc-ddd-toolkit/atc-classification>.
  119. Docherty, A.R., Mullins, N., Ashley-Koch, A.E., Qin, X., Coleman, J.R.I., Shabalin, A., Kang, J., Murnyak, B., Wendt, F., Adams, M., et al. (2023). GWAS Meta-Analysis of Suicide Attempt: Identification of 12 Genome-Wide Significant Loci and Implication of Genetic Risks for Specific Health Factors. *Am. J. Psychiatr.* 180, 723–738. <https://doi.org/10.1176/appi.ajp.21121266>.



## STAR★METHODS

### KEY RESOURCES TABLE

| REAGENT or RESOURCE                                                   | SOURCE                                                       | IDENTIFIER                                                                                                                                                                                                                |
|-----------------------------------------------------------------------|--------------------------------------------------------------|---------------------------------------------------------------------------------------------------------------------------------------------------------------------------------------------------------------------------|
| <b>Deposited data</b>                                                 |                                                              |                                                                                                                                                                                                                           |
| GWAS summary statistics                                               | This paper; China National GeneBank DataBase                 | CNSA: CNP0003674                                                                                                                                                                                                          |
| Human reference genome NCBI build 38, GRCh38                          | Genome Reference Consortium                                  | <a href="http://www.ncbi.nlm.nih.gov/projects/genome/assembly/grc/human/">http://www.ncbi.nlm.nih.gov/projects/genome/assembly/grc/human/</a>                                                                             |
| 1000 Genomes Project reference panel EAS                              | The International Genome Sample Resource                     | <a href="https://www.internationalgenome.org/data">https://www.internationalgenome.org/data</a>                                                                                                                           |
| Summary statistics from GWAS Catalog (See Table S7)                   | Sollis E. et al., 2023 <sup>58</sup>                         | <a href="https://www.ebi.ac.uk/gwas/">https://www.ebi.ac.uk/gwas/</a>                                                                                                                                                     |
| The reference transcriptome data form GTEx                            | Gamazon E.R. et al., 2015 <sup>66</sup>                      | <a href="https://www.gtexportal.org/home/">https://www.gtexportal.org/home/</a>                                                                                                                                           |
| The effect sizes for all 49 tissues                                   | Barbeira A.N. et al., 2021 <sup>89</sup>                     | Zenodo: 5709385                                                                                                                                                                                                           |
| Phase 3 downloaded from the MAGMA website                             | de Leeuw C.A. et al., 2015 <sup>90</sup>                     | <a href="https://ctg.cncr.nl/software/magma">https://ctg.cncr.nl/software/magma</a>                                                                                                                                       |
| The drug-gene-set built from DGIdb v5                                 | Freshour S.L. et al., 2021 <sup>91</sup>                     | <a href="https://www.dgldb.org/">https://www.dgldb.org/</a>                                                                                                                                                               |
| Anatomical Therapeutic Chemical (ATC) classification of the drug data | The WHO Collaborating Center for Drug Statistics Methodology | <a href="https://www.whocc.no/">https://www.whocc.no/</a>                                                                                                                                                                 |
| DisGeNET                                                              | Piñero J. et al., 2017 <sup>92</sup>                         | <a href="https://www.disgenet.org">https://www.disgenet.org</a>                                                                                                                                                           |
| <b>Software and algorithms</b>                                        |                                                              |                                                                                                                                                                                                                           |
| Original Code for analyses                                            | This paper                                                   | Zenodo: 11614736                                                                                                                                                                                                          |
| BWA-MEM 0.7.16a-r1181                                                 | Li H. and Durbin R., 2009 <sup>93</sup>                      | <a href="https://bio-bwa.sourceforge.net/">https://bio-bwa.sourceforge.net/</a>                                                                                                                                           |
| SAMtools 1.3                                                          | Danecek P. et al., 2021 <sup>94</sup>                        | <a href="https://www.htslib.org/">https://www.htslib.org/</a>                                                                                                                                                             |
| BQSR of the GATK 4.0.4.0 toolset                                      | McKenna A. et al., 2010 <sup>95</sup>                        | <a href="https://gatk.broadinstitute.org/hc/en-us/articles/360035890531-Base-Quality-Score-Recalibration-BQSR-">https://gatk.broadinstitute.org/hc/en-us/articles/360035890531-Base-Quality-Score-Recalibration-BQSR-</a> |
| STITCH 1.6.6                                                          | Davies R.W. et al., 2016 <sup>96</sup>                       | <a href="https://github.com/rwdavies/STITCH">https://github.com/rwdavies/STITCH</a>                                                                                                                                       |
| PLINK2                                                                | Chang C.C. et al., 2015 <sup>97</sup>                        | <a href="https://www.cog-genomics.org/plink/2.0/">https://www.cog-genomics.org/plink/2.0/</a>                                                                                                                             |
| LDSC 1.0.1                                                            | Bulik-Sullivan B.K. et al., 2015 <sup>98</sup>               | <a href="https://github.com/bulik/ldsc">https://github.com/bulik/ldsc</a>                                                                                                                                                 |
| Metascape                                                             | Zhou Y. et al., 2019 <sup>99</sup>                           | <a href="https://metascape.org/">https://metascape.org/</a>                                                                                                                                                               |
| STRING                                                                | Szklarczyk D. et al., 2023 <sup>100</sup>                    | <a href="https://string-db.org/cgi/">https://string-db.org/cgi/</a>                                                                                                                                                       |
| R software version 4.0.2                                              | R project                                                    | <a href="https://www.r-project.org/">https://www.r-project.org/</a>                                                                                                                                                       |
| BaseVar                                                               | Liu S. et al., 2018 <sup>17</sup>                            | <a href="https://pypi.org/project/basevar/">https://pypi.org/project/basevar/</a>                                                                                                                                         |
| LiftOver                                                              | Hinrichs A.S. et al., 2006 <sup>101</sup>                    | <a href="https://genome.ucsc.edu/cgi-bin/hgLiftOver">https://genome.ucsc.edu/cgi-bin/hgLiftOver</a>                                                                                                                       |
| R package TwoSampleMR: clump_data                                     | Hemani G. et al., 2018 <sup>65</sup>                         | <a href="https://mrcieu.github.io/TwoSampleMR/reference/clump_data.html">https://mrcieu.github.io/TwoSampleMR/reference/clump_data.html</a>                                                                               |
| MAGMA v1.10                                                           | de Leeuw C.A. et al., 2015 <sup>90</sup>                     | <a href="https://ctg.cncr.nl/software/magma">https://ctg.cncr.nl/software/magma</a>                                                                                                                                       |
| R package coloc                                                       | Wallace C. et al., 2020 <sup>46</sup>                        | <a href="https://cran.r-project.org/web/packages/coloc/">https://cran.r-project.org/web/packages/coloc/</a>                                                                                                               |
| R package locuscomparer                                               | Liu B. et al., 2019 <sup>47</sup>                            | <a href="https://github.com/boxiangliu/locuscomparer">https://github.com/boxiangliu/locuscomparer</a>                                                                                                                     |
| <b>Other</b>                                                          |                                                              |                                                                                                                                                                                                                           |
| MANE (Maternal and Neonatal) PheWeb websiteThis paper                 | This paper                                                   | <a href="https://db.cngb.org/MANE.PheWeb/">https://db.cngb.org/MANE.PheWeb/</a>                                                                                                                                           |

### EXPERIMENTAL MODEL AND SUBJECT DETAILS

#### Subjects

All pregnant women were recruited from the Wuhan Children's Hospital in Wuhan, Hubei Province, China, where they underwent routine prenatal tests—including blood tests, urinary tests, oral glucose tolerance tests, ultrasound screenings, and NIPT test—from 2017 to 2020. All the participants have signed the informed consent forms. This study was approved by the IRB at Wuhan

Children's Hospital (2021R062) and BGI Research (BGI-IRB 21088) and also authorized by the Human Genetic Resources Administration of China ([2021] CJ2002). We used NIPT sequencing data as the sole inclusion criterion and then performed filtering based on sequencing depth, mapping rate, and outlier values.

### Phenotype

We collected four sets of phenotypic data: (1) maternal information from the NIPT questionnaire, (2) laboratory tests from prenatal exams, (3) neonatal information from childbirth outcomes, and (4) clinical diagnoses from doctor's notes. Maternal data included age, height, weight, systolic blood pressure (SBP), diastolic blood pressure (DBP), and obstetric history, collected pre-NIPT screening. BMI was calculated as weight (kg) divided by height (m<sup>2</sup>). Hypertension was defined as SBP/DBP over 140/90 mmHg. As a result, four maternal factors—age, BMI, obstetric history (first-time pregnancy status), and hypertension—were used for regression analysis.

The laboratory tests were primarily blood and urinary biochemical measurements. To detect early risk indicators of GDM, we focused on laboratory features in the first trimester. A total of 93 available phenotypes were measured and classified into 9 categories, including hematological ( $n = 24$ ), urinalysis ( $n = 24$ ), infection ( $n = 14$ ), liver-related ( $n = 8$ ), metabolism ( $n = 6$ ), protein ( $n = 5$ ), electrolyte ( $n = 4$ ), hormone ( $n = 4$ ), and kidney-related ( $n = 4$ ). For certain phenotypes, some women had multiple records due to more than one examination or test. We defined an overall observation by taking average or ascertained incidence for quantitative and dichotomous traits, respectively.

The neonatal information included gestational week, birth weight, newborn gender, and delivery options. Low birth weight is defined as a birth weight under 2500g, while fetal macrosomia is diagnosed when a baby weighs over 4000g. The delivery options included natural birth and cesarean section. The clinical diagnosis was the doctor's descriptions of pregnancy status which spanned a wide spectrum of information, for example, pregnancy complications, how much amniotic fluid, what fetal positions for birth, etc.

### Maternal glyceic traits

The oral glucose tolerance test (OGTT) was usually taken during the 24<sup>th</sup> to 28<sup>th</sup> week of pregnancy. Specifically, the pregnant women were asked to drink about 237mL liquid that contained 75g glucose. Before drinking the liquid, the pregnancy women would have blood drawn that for measuring the fasting glucose (0hGlu). After drinking the solution, blood was drawn two more times at 1-h (1hGlu) and 2-h (2hGlu) post consumption. By following the recommendations of international association of diabetes and pregnancy study groups,<sup>102</sup> we defined a GDM case if at least one of the following factors were true: 0hGlu >5.1 mmol/L, 1hGlu >10.0 mmol/L, or 2hGlu >8.5 mmol/L. To consider the contributions of the three OGTT values simultaneously, we further computed the area under the curve (AUC) as  $1hGlu + (0hGlu + 2hGlu)/2$ .<sup>103,104</sup> We used GDM<sub>AUC</sub> as a complement to the GDM status and performed same statistical analysis.

## METHOD DETAILS

### Whole-genome sequencing

During gestational weeks 12–22, pregnant women who consented to the NIPT test had 5 mL of peripheral blood drawn. The blood samples were centrifuged to separate the plasma, which contained both maternal and fetal cell-free DNA (cfDNA). We then employed single-end whole genome sequencing using the BGISEQ-500 platform, with a read length of 35 base pairs (bp). On average, the sequencing depth ranged between 0.1× and 0.2×. Notably, at the time of NIPT testing, the fetal DNA fraction in maternal plasma is approximately 10%,<sup>105,106</sup> with half of it being identical to the maternal DNA. For subsequent analyses, we did not distinguish between maternal and fetal DNA; instead, we treated all cfDNA as maternal.

### Variants calling

The sequencing reads were stored in fastq (.fq) format. First, we used BWA-MEM algorithm<sup>93</sup> to align input reads to the human reference genome assembly GRCh38/hg38 and obtained the bam alignment files. Then, we used SAMtools<sup>94</sup> to sort sequences and remove duplicate sequences, thus to keep those sequences with highest mapping quality. The following step was to check the base quality in the aligned files and correct the quality value of the original bases to ensure the accuracy of base detection, which was achieved by Base Quality Score Recalibration (BQSR) of the GATK toolset.<sup>95</sup> Finally, to obtain the population-based variants, we used BaseVar that was designed to call variants especially for ultra-low-pass WGS data.<sup>107</sup> The detected variants were stored in VCF format.

### Genotype imputation

Since the NIPT sequencing data was ultra-low depth and only about 10% of the genome were measured, resulting in a high rate of genotype missingness. To make the NIPT sequence data qualified for genetic analysis, we performed genotype imputation for the aligned bam files in STITCH,<sup>96</sup> which produced allele dosages of the imputed genotype. To evaluate the imputation performance, we used 30 randomly selected Chinese samples from the high-coverage 1000 genomes project (1KGP)<sup>108</sup> as the true set, down-sampled them to about 0.1×, and performed imputation for the down-sample data together with the original NIPT data. Then, we calculated the Pearson's correlation  $R^2$  between the imputed dosages (test) and high coverage genotypes (truth) as the imputation accuracy.

## QUANTIFICATION AND STATISTICAL ANALYSIS

### Regression analysis

For the four types of phenotypes, we performed regression analysis to examine their relationship with GDM and  $GDM_{AUC}$ . In general, for potential risk factors (e.g., maternal age, early-stage laboratory tests), we fitted logistic and linear model by regressing GDM and  $GDM_{AUC}$  as dependent variable, respectively. For potential outcomes (e.g., birthweight, delivery type), we fitted either linear or logistic regression for quantitative or binary outcomes while treating GDM and  $GDM_{AUC}$  as predictive variable. For the clinical diagnosis that were all binary variables, it was uncertain whether they were potential risks or outcomes, we used chi-square and t testes for GDM and  $GDM_{AUC}$ , respectively.

For significant risk factors with  $p$ -value less than  $5.15E-4$  ( $=0.05/97$ ), we further performed multivariate logistic and linear regression analysis for GDM and  $GDM_{AUC}$ , respectively. It is important to acknowledge that not all phenotypes had measurements available for every participant, which could reduce the effective sample size in a multivariate model. To ensure robustness, we selected a subset of significant factors, ensuring that the sample size in the multivariate model remained at least 3,000.

### Genome-wide association study

We executed GWAS analysis for the three glycemic traits (0hGlu, 1hGlu, and 2hGlu), GDM status and  $GDM_{AUC}$ . This was achieved in PLINK 2.0<sup>97</sup> with argument `-glm -maf 0.05 -hwe 1e-06 -geno 0.1` by testing SNPs with minor allele frequency (MAF) > 0.05, Hardy-Weinberg equilibrium (HWE) >  $1E-6$ , and genotype missing rate (geno) < 0.1. The logistic regression model was employed to assess GDM status, whereas linear regression models were utilized for evaluating OGTT traits and  $GDM_{AUC}$ . The covariates comprised maternal age, gestational week when taking OGTT screening, and the five principal components (PCs) of genotype variants. All covariates were standardized to have a mean of zero and a standard deviation of one by using the argument `-covar-variance-standardize` and the quantitative phenotype were normalized by `-pheno-quantile-normalize`. We set the genome-wide significance threshold as  $5E-08$ .

Heritability is a metric indicating the proportion of phenotypic variation in a trait that can be ascribed to genetic factors.<sup>109</sup> We used the LDSC (Linkage Disequilibrium Score Regression) method<sup>98</sup> to estimate the heritability of glycemic traits, GDM, and  $GDM_{AUC}$ . We note that, given the binary nature of GDM status, calculating heritability should be conducted using the liability scale rather than the observed scale. In particular, we specified the population prevalence of GDM as 0.1 and the sample prevalence as 0.113 by using arguments `-pop-prev` and `-samp-prev`, respectively.

### Protein-protein interaction and gene set enrichment analysis

Protein-protein interaction (PPI) analysis aims to identify and characterize the network of interactions between two or more proteins, which is crucial for deciphering cellular processes and functions.<sup>110</sup> Gene set enrichment analysis (GSEA) focuses on identifying biological pathways that are significantly enriched within a list of genes.<sup>111</sup> We conducted the PPI and GSEA analysis by combining all mapped genes associated with the five pregnancy glycemic traits. For PPI analysis, we utilized STRING to visualize the network.<sup>100</sup> This included known interactions (e.g., experimentally determined), predicted interactions (e.g., gene neighborhood), and other interactions (e.g., text-mining). GSEA analysis was performed using Metascape,<sup>99</sup> leveraging the DisGeNET database, which catalogs gene-disease associations.<sup>92</sup>

### Genetic correlation analysis

Genetic correlation refers to the correlation established at the genetic level between two phenotypes.<sup>112</sup> Understanding the genetic correlation between traits is helpful to understand the shared genetic etiology and reveal the genetic pleiotropy. We employed LDSC<sup>98</sup> to estimate the genetic correlations between 0hGlu, GDM,  $GDM_{AUC}$ , and potentially correlated traits. Specifically, we acquired full summary statistics for these traits from the GWAS catalog.<sup>58</sup> To ensure compatibility, we utilized LiftOver<sup>101</sup> to convert the reference genome of the downloaded summary statistics to GRCh38. LD calculations were performed using the East Asian population data from the 1000 Genomes Project as a reference.

### Mendelian randomization analysis

Mendelian randomization (MR) is a statistical technique to assess causal effects of a modifiable exposure on an outcome by using genetic variants as instrumental variables (IVs).<sup>113</sup> In this study, we would like to explore the causal relationships between certain potentially correlated phenotypes and glycemic traits. For each examined exposure phenotype, we chose highly significant SNPs with  $p$ -value less than  $5E-08$  and conducted LD clumping to ensure the retained SNPs were independent. Specifically, we used R function `TwoSampleMR: clump_data`<sup>65</sup> by setting clumping  $r^2$  as 0.2 and other parameters in default values. The remaining SNPs were utilized to compute the polygenic score (PGS) for our participants, achieved by multiplying the exposure's genetic effects with individual-level genotype dosages. To assess the causality of the PGS on glycemic traits, we constructed appropriate regression models with the PGS as the predictor.

### Transcriptome-wide association study

TWAS is a method that integrates gene expression data and genotype information to identify genes whose expression levels are associated with complex traits or diseases.<sup>66,67</sup> It involves two datasets: reference transcriptome data and the main dataset. The reference data includes samples with genotype and gene expression information, used to study genetic impacts on gene expression. The main dataset consists of samples with genotype and complex traits. By integrating genetic effects from the reference data with the main dataset, we derived genetically regulated expression (GReX). Finally, we tested the association between GReX and the trait of interest.

In this study, we used the GTEx database (v8) as our reference transcriptome data to estimate GReX levels for our participants.<sup>66</sup> Specifically, we chose to use the cross-tissue gene expression imputation framework (CTIMP)<sup>114</sup> and downloaded the effect sizes from Zenodo<sup>89</sup> for all 49 tissues. The *cis*-eQTL effects were obtained from all variants located within 500kb upstream and downstream of a target gene. These variants were clumped using an  $r^2$  threshold of 0.2 to retain independent effects using R:*clump\_data*.<sup>65</sup> GReX was calculated by multiplying eQTL effects with genotype dosages. Logistic regression was then used to analyze GDM status, and linear regression was applied to 0hGlu and GDM<sub>AUC</sub>, with a significance threshold adjusted to 0.001 using Bonferroni correction.

### Drug target enrichment analysis

In this section, we conducted drug target enrichment analysis (DTEA) to determine if a group of candidate genes was significantly enriched for known drug targets. This analysis can provide insights into drug repurposing opportunities, uncover novel therapeutic targets, and aid in understanding the molecular mechanisms underlying diseases.<sup>115</sup> Using MAGMA v1.10,<sup>90</sup> we performed drug-gene set analysis on glycemia-associated genes. The drug-gene set was curated from the Drug-Gene Interaction Database (DGIdb) version 5 interactions file.<sup>91</sup> Gene-level analyses were performed using the default competitive model.<sup>116</sup>

The follow-up analysis involved drug classification. For this, we needed data on the Anatomical Therapeutic Chemical (ATC) classification of drugs.<sup>117,118</sup> Using previously described enrichment curves, we annotated the drug-gene set analysis results according to ATC classifications, excluding those with fewer than 10 valid drug-gene sets.<sup>116,119</sup> The sets were ranked by association ( $-\log_{10}(p)$ ) and divided into groups based on ATC classification. We then calculated the area under the curve (AUC) and  $p$ -value using the Wilcoxon Mann-Whitney test, with a Bonferroni-corrected significance threshold set at  $p < 7.58E-04$  for 66 drug classifications.

**Cell Genomics, Volume 4**

**Supplemental information**

**Novel insights into the genetic architecture  
of pregnancy glycaemic traits  
from 14,744 Chinese maternities**

**Huanhuan Zhu, Han Xiao, Linxuan Li, Meng Yang, Ying Lin, Jieqiong Zhou, Xinyi Zhang, Yan Zhou, Xianmei Lan, Jiuying Liu, Jingyu Zeng, Lin Wang, Yuanyuan Zhong, Xiaobo Qian, Zhongqiang Cao, Panhong Liu, Hong Mei, Mingzhi Cai, Xiaonan Cai, Zhuangyuan Tang, Liqin Hu, Rui Zhou, Xun Xu, Huanming Yang, Jian Wang, Xin Jin, and Aifen Zhou**

**Figure S1.** The basic information of study participants, related to Table 1

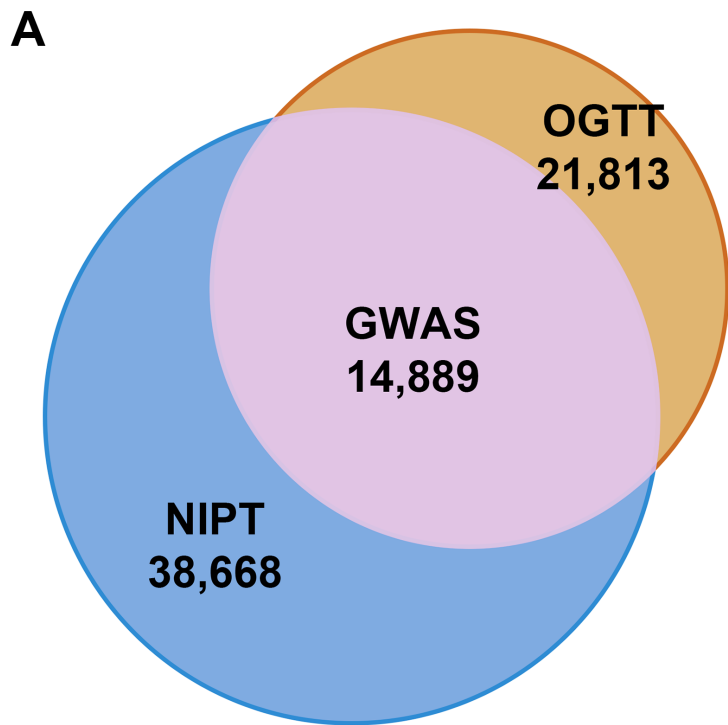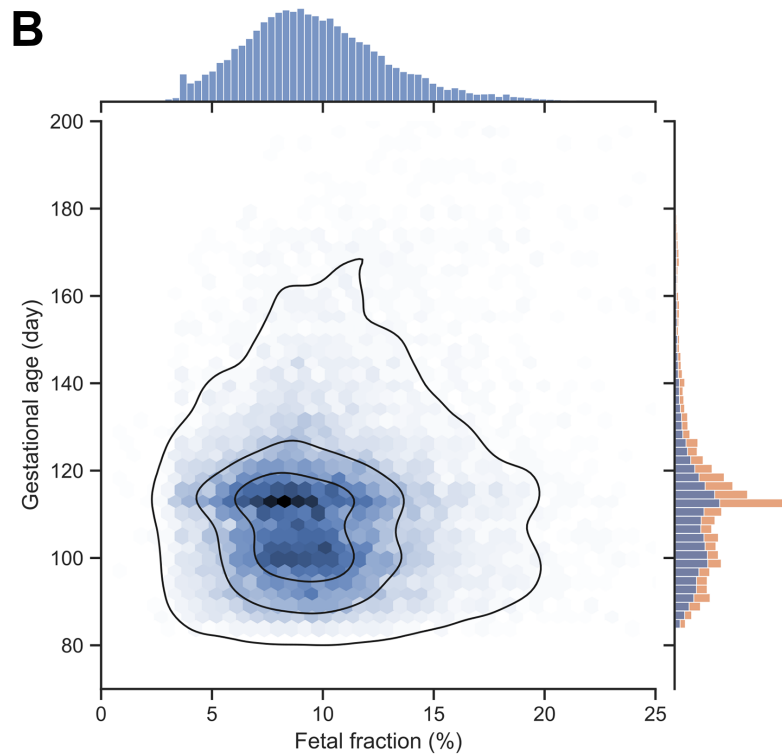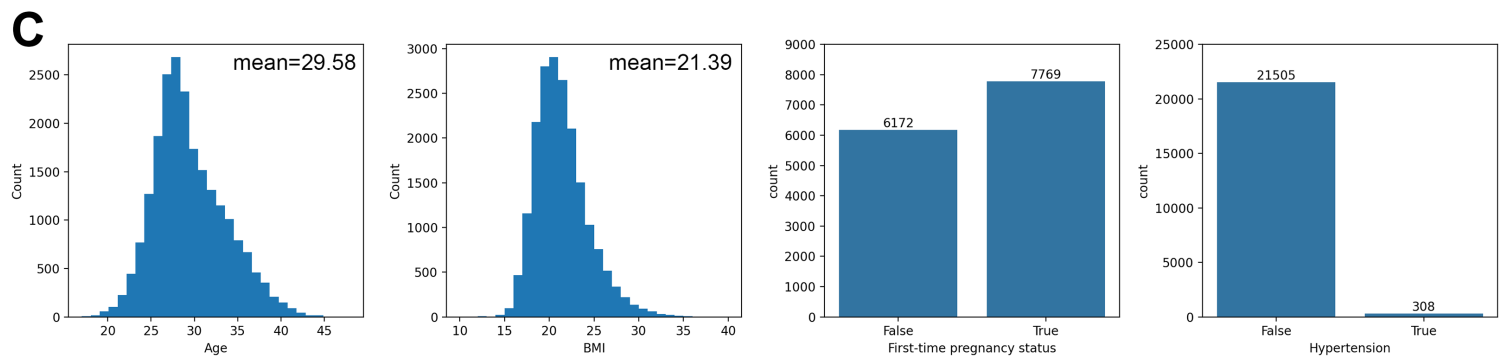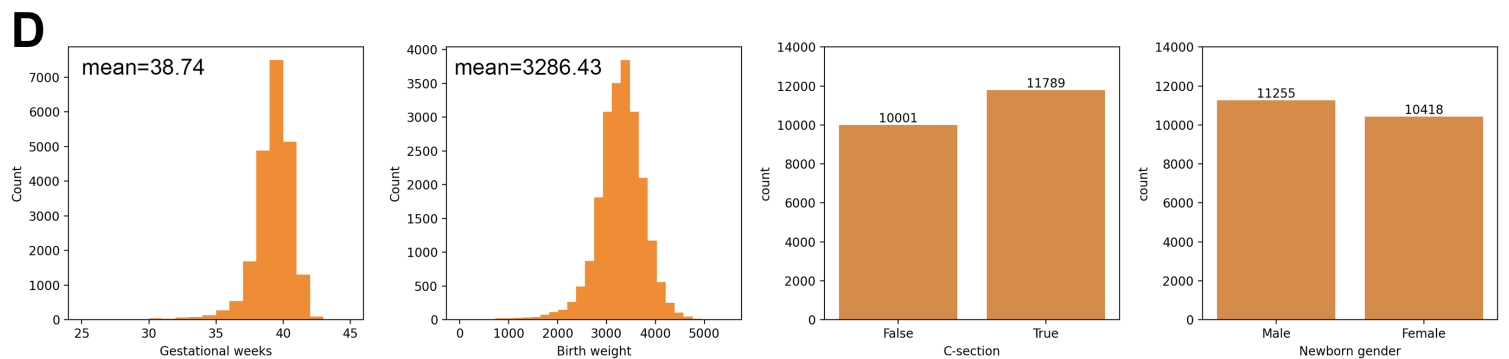

**Figure S2.** Statistics on glyceimic traits and regression analysis with laboratory features, related to Table 1

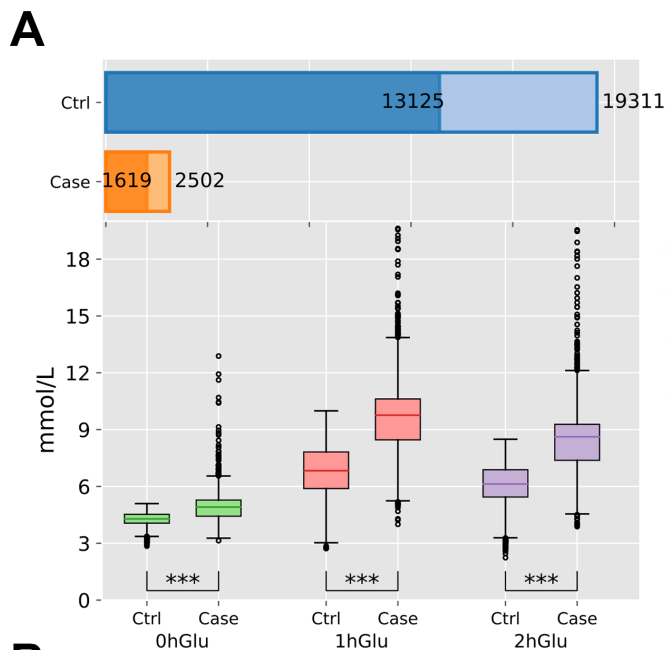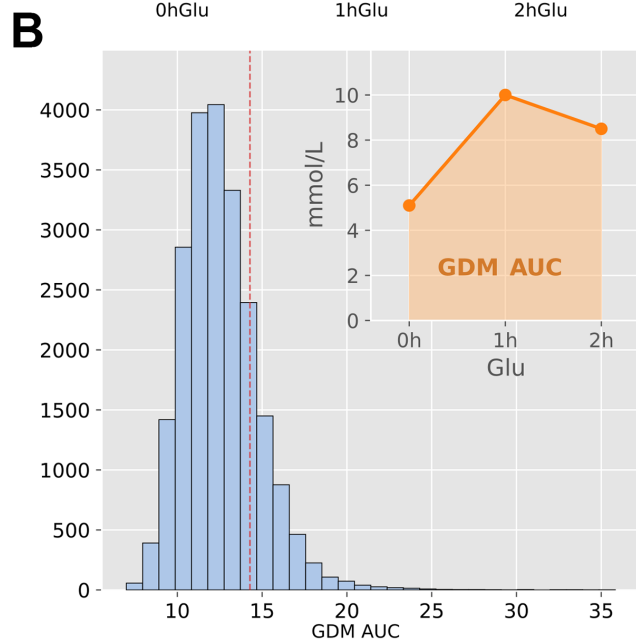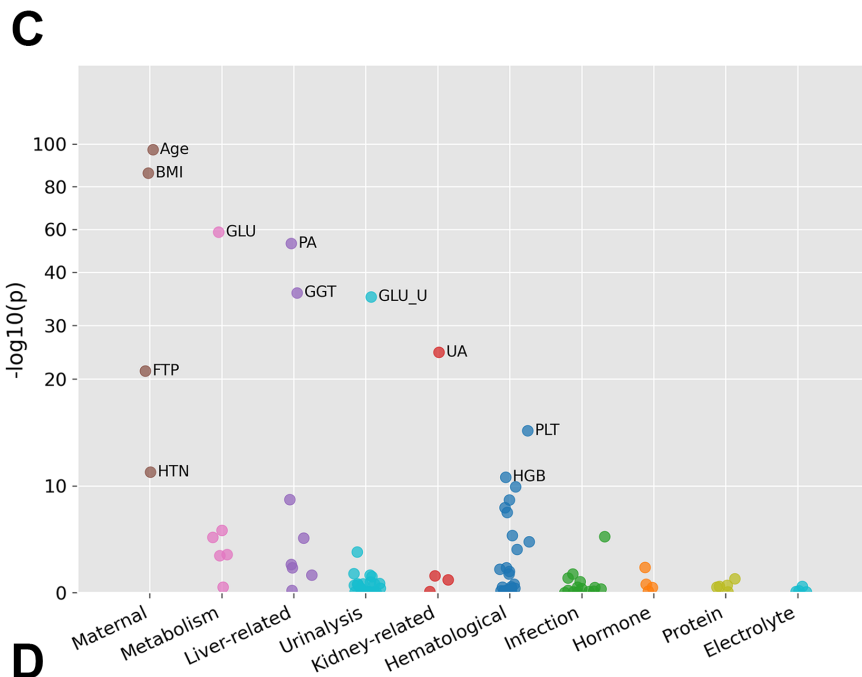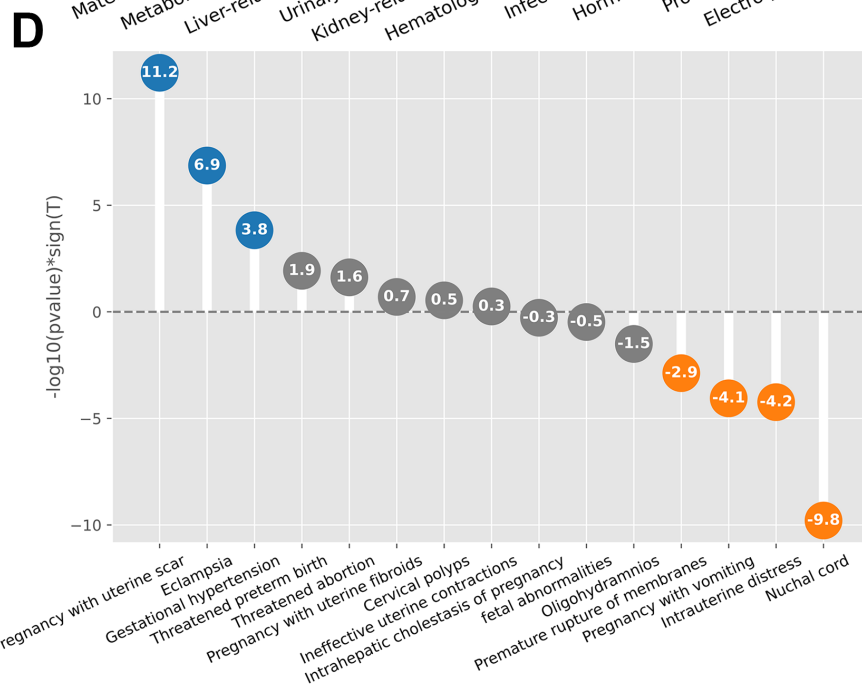

**Figure S3.** The assessment of sequencing and genotype imputation, related to STAR Methods

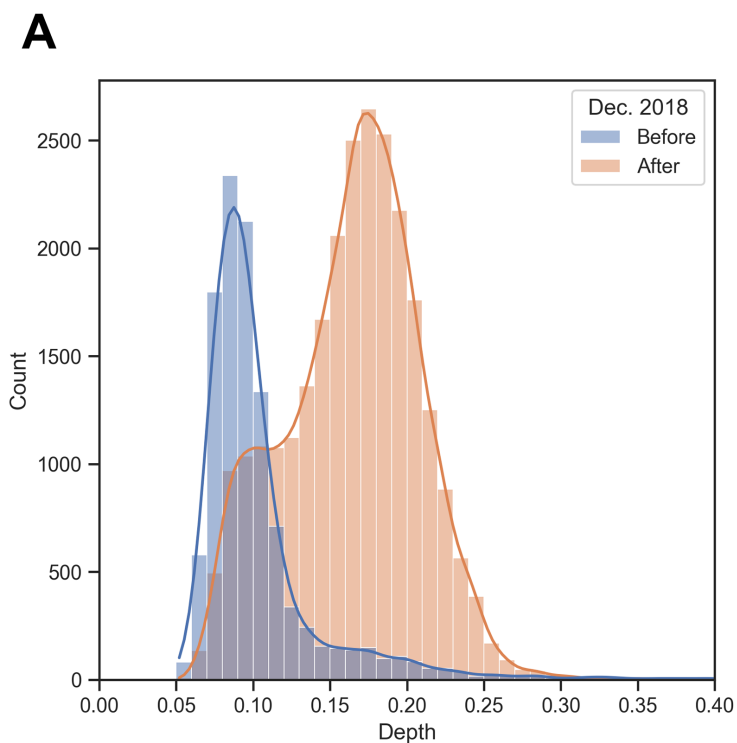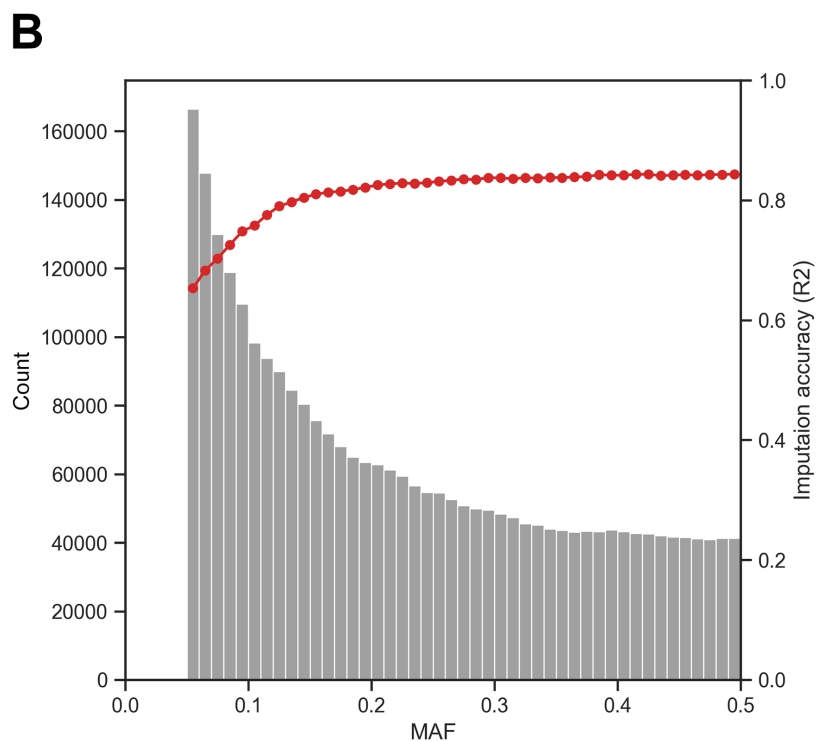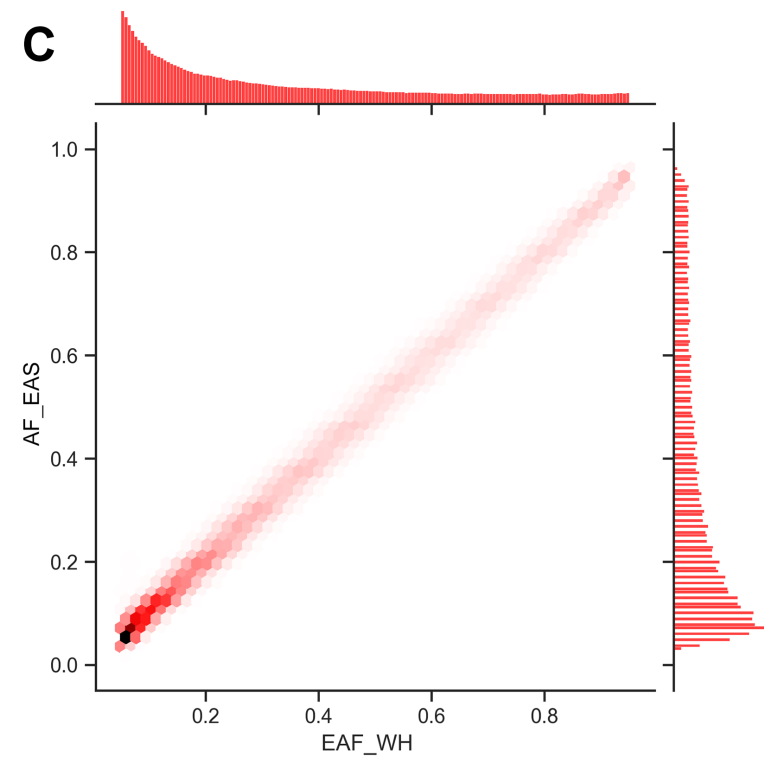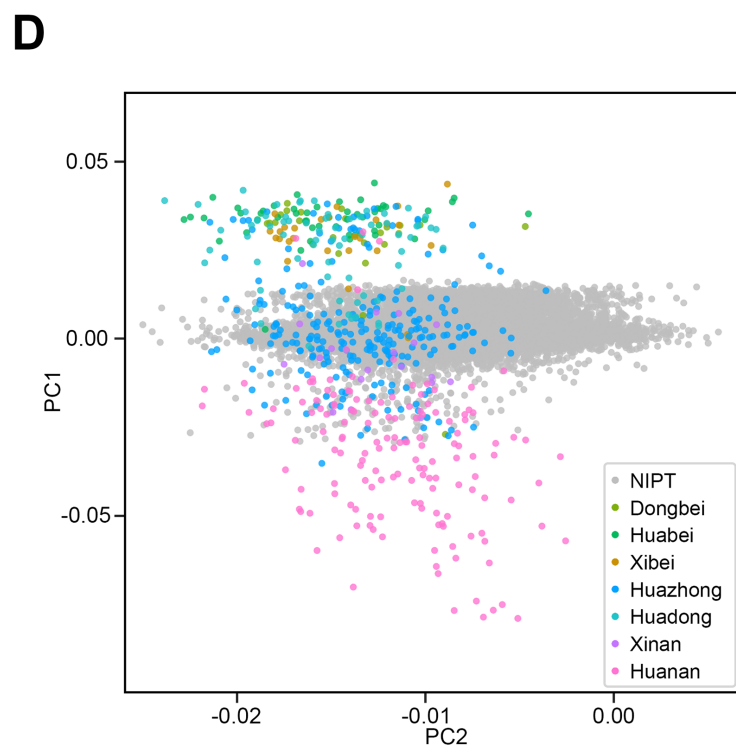



**Figure S4.** The results of colocalization analysis between discovery and replication studies in the region of gene *ESR1*, related to Figure 1

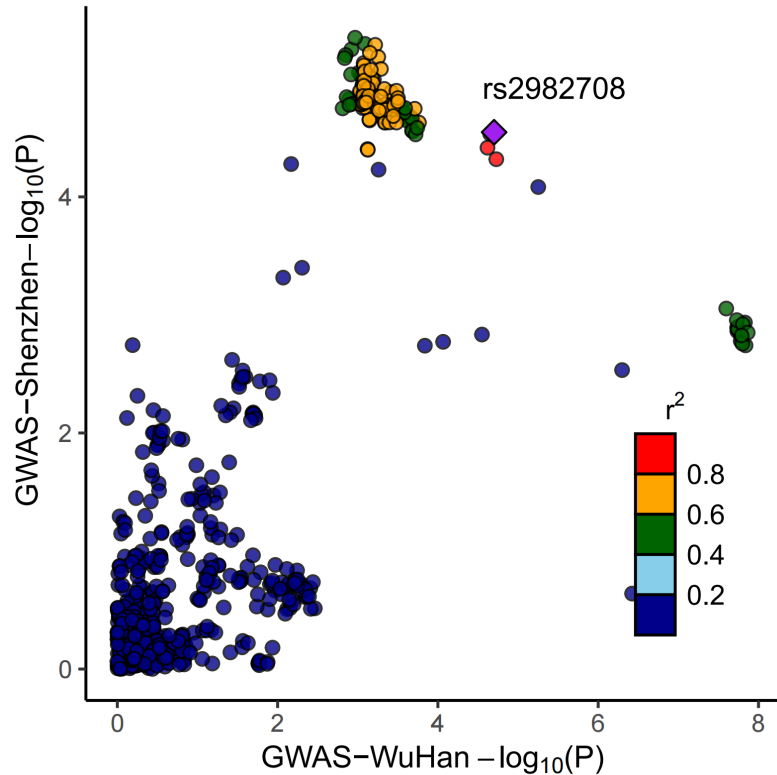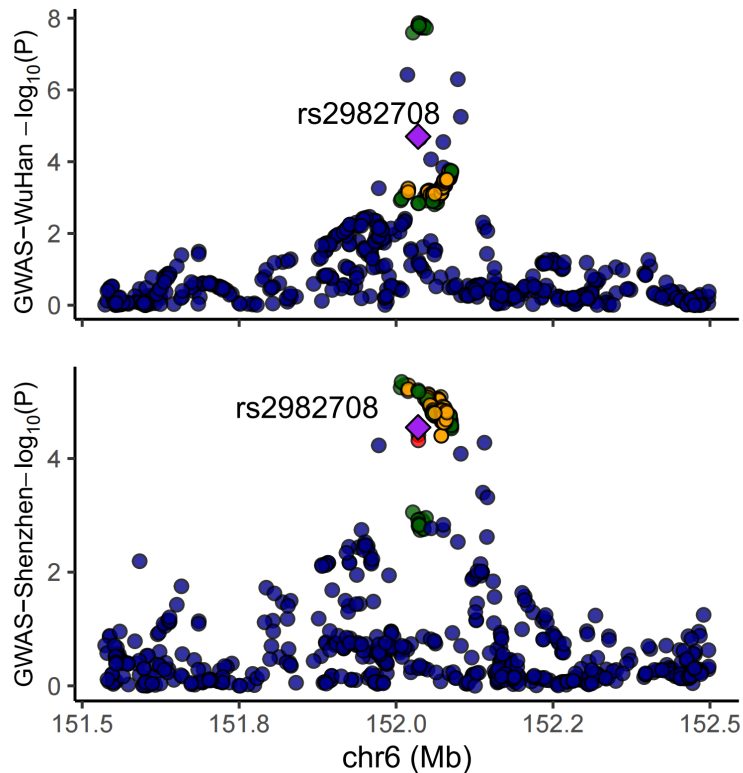

**Figure S5.** The TWAS results between GTEx data and glycemic traits, related to STAR Methods

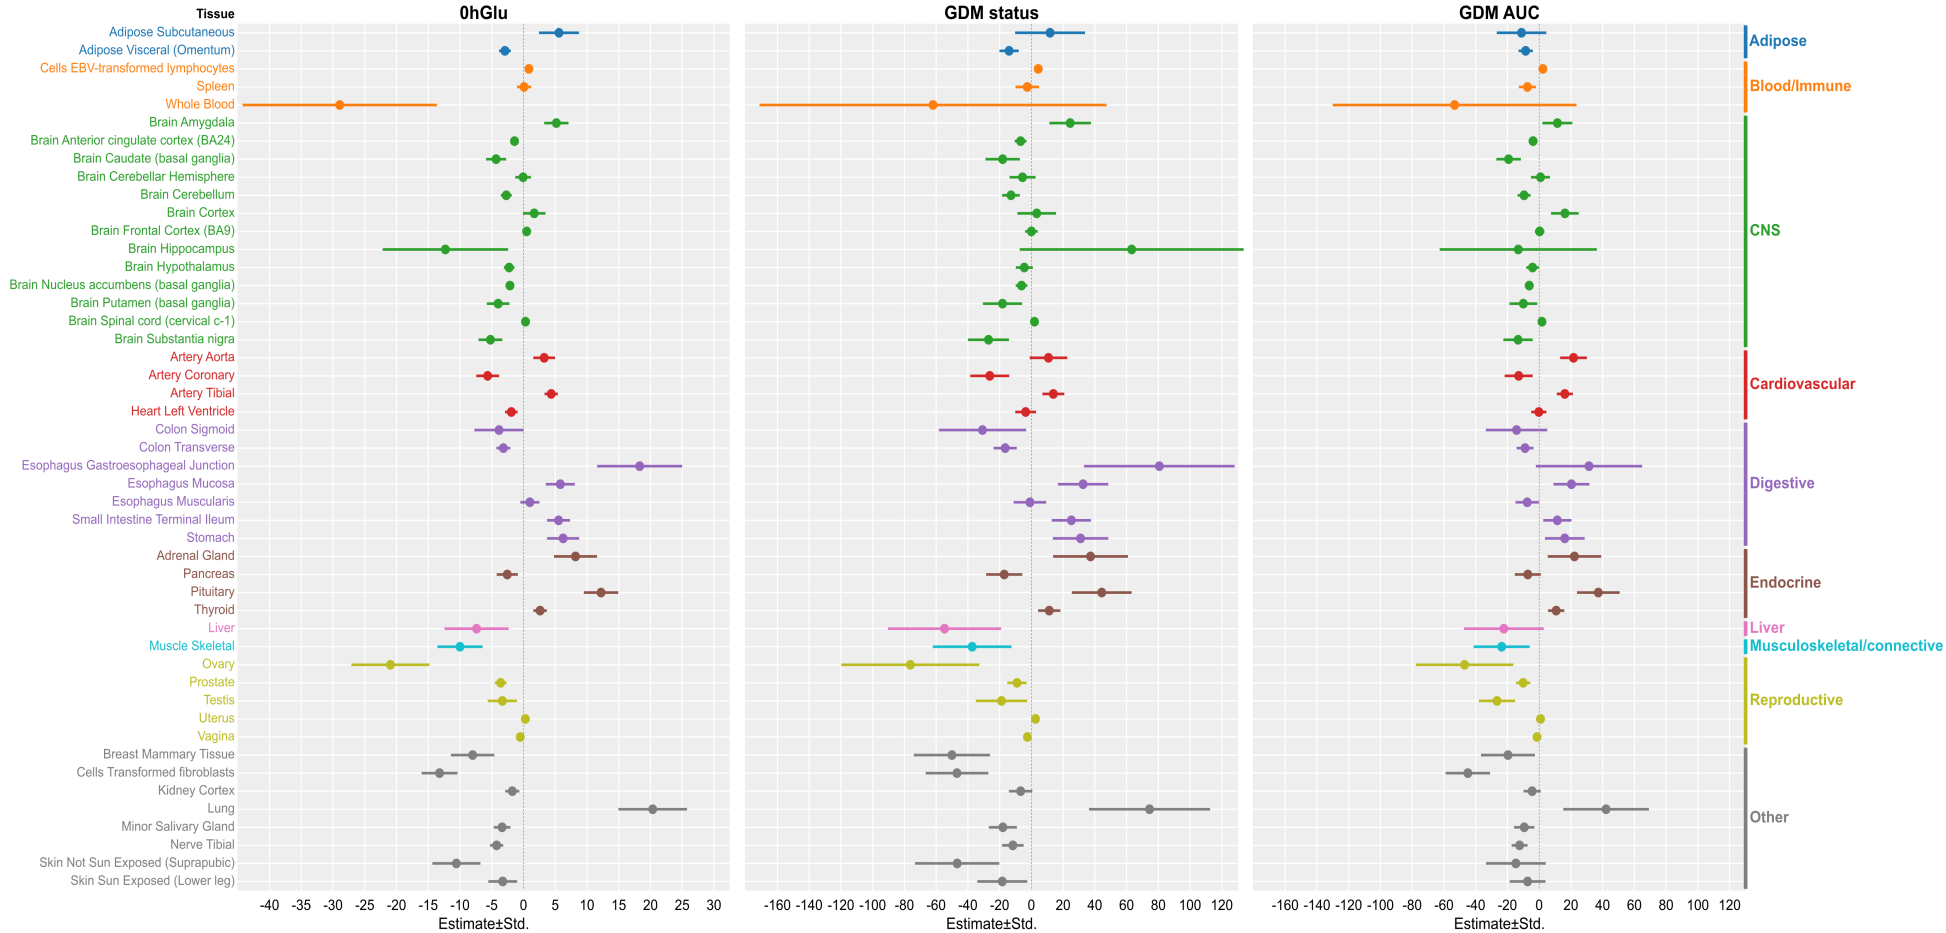

**Figure S6.** The top ten drug ATC classifications from DTEA analysis, related to STAR Methods

Anatomical therapeutic chemical classification

### 0hGlu

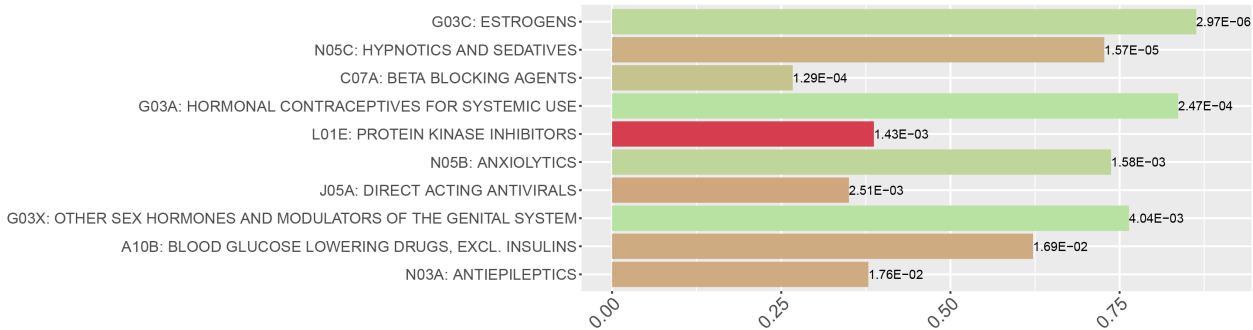

### GDM status

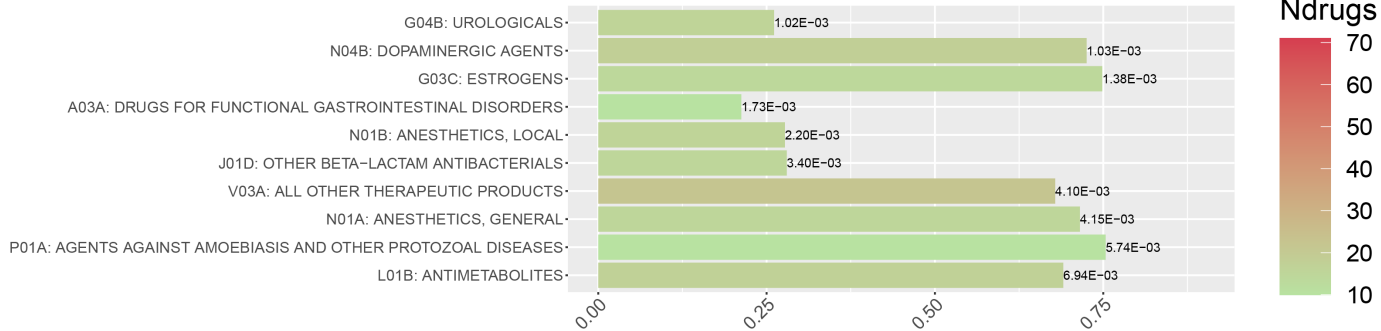

### GDM AUC

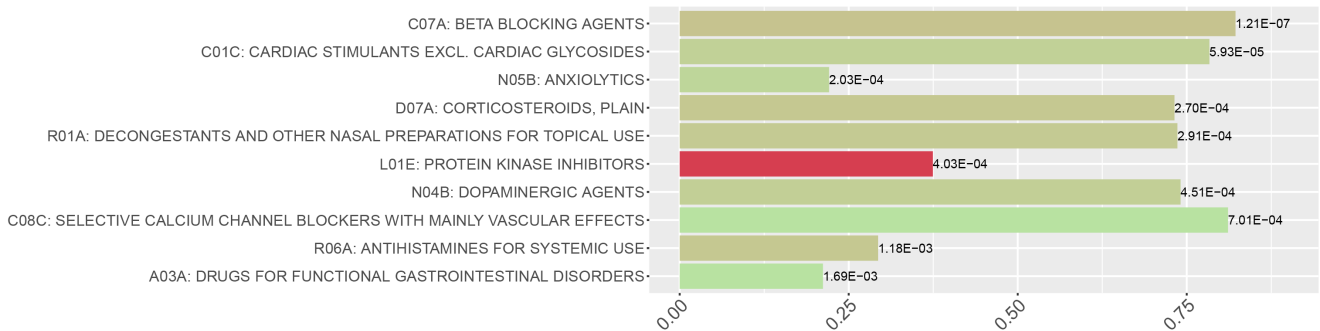

Area under the curve

**Table S1. The univariate regression analysis of GDM status and GDM AUC on early-stage laboratory traits, related to Table 1**

| Trait information |                                                   |              |       |                    | GDM status univariate regression |       |                 | GDM AUC univariate regression |       |                  |
|-------------------|---------------------------------------------------|--------------|-------|--------------------|----------------------------------|-------|-----------------|-------------------------------|-------|------------------|
| Category          | Trait                                             | Abbreviation | n     | mean±std   case(%) | beta                             | std.  | pvalue          | beta                          | std.  | pvalue           |
| Metabolism        | Blood glucose                                     | GLU          | 11557 | 4.51±0.48          | 1.101                            | 0.068 | <b>1.75E-59</b> | 1.219                         | 0.048 | <b>3.29E-140</b> |
| Liver-related     | Prealbumin                                        | PA           | 17417 | 224.17±36.74       | 0.011                            | 0.001 | <b>3.26E-54</b> | 0.011                         | 0.001 | <b>1.83E-114</b> |
| Liver-related     | $\gamma$ -glutamyl transferase                    | GGT          | 17417 | 14.30±10.11        | 0.027                            | 0.002 | <b>7.36E-37</b> | 0.033                         | 0.002 | <b>1.74E-67</b>  |
| Urinalysis        | Urine glucose                                     | GLU U        | 18619 | 2187(11.75%)       | 0.825                            | 0.066 | <b>4.29E-36</b> | 0.957                         | 0.056 | <b>3.77E-65</b>  |
| Kidney-related    | Uric acid                                         | UA           | 17807 | 212.06±48.87       | 0.005                            | 0.001 | <b>9.21E-26</b> | 0.005                         | 0.000 | <b>2.45E-44</b>  |
| Hematological     | Platelet count                                    | PLT          | 18790 | 237.63±55.22       | 0.004                            | 0.000 | <b>6.86E-16</b> | 0.004                         | 0.000 | <b>2.09E-30</b>  |
| Hematological     | Hemoglobin                                        | HGB          | 18790 | 125.17±10.25       | 0.017                            | 0.003 | <b>1.55E-11</b> | 0.015                         | 0.002 | <b>6.46E-18</b>  |
| Hematological     | White blood cell count                            | WBC          | 18790 | 9.17±2.13          | 0.076                            | 0.012 | <b>1.21E-10</b> | 0.077                         | 0.008 | <b>1.91E-19</b>  |
| Liver-related     | Alkaline phosphatase                              | ALP          | 17417 | 44.24±10.41        | 0.015                            | 0.002 | <b>1.94E-09</b> | 0.018                         | 0.002 | <b>5.60E-24</b>  |
| Hematological     | Plateletcrit                                      | PCT          | 15752 | 0.23±0.06          | 2.866                            | 0.478 | <b>2.02E-09</b> | 2.698                         | 0.341 | <b>2.63E-15</b>  |
| Hematological     | Red blood cell count                              | RBC          | 18790 | 4.26±0.38          | 0.380                            | 0.067 | <b>1.12E-08</b> | 0.367                         | 0.047 | <b>9.55E-15</b>  |
| Hematological     | Hematocrit                                        | HCT          | 18790 | 37.67±2.98         | 0.048                            | 0.009 | <b>2.97E-08</b> | 0.047                         | 0.006 | <b>1.47E-14</b>  |
| Metabolism        | Oral glucose tolerance test-fasting               | OGTT0h       | 102   | 5.02±1.07          | 4.227                            | 0.877 | <b>1.43E-06</b> | 2.925                         | 0.270 | <b>3.04E-18</b>  |
| Hematological     | platelet larger cell ratio                        | P-LCR        | 15646 | 28.46±7.90         | -0.017                           | 0.004 | <b>4.30E-06</b> | -0.014                        | 0.003 | <b>3.71E-08</b>  |
| Infection         | Herpes simplex virus type 2 specific IgG antibody | HSV-2 IgG    | 6591  | 474(7.19%)         | 0.640                            | 0.141 | <b>5.48E-06</b> | 0.410                         | 0.121 | 6.86E-04         |
| Metabolism        | Hemoglobin A1c                                    | HbA1C        | 230   | 5.20±0.56          | 2.527                            | 0.560 | <b>6.38E-06</b> | 3.758                         | 0.328 | <b>7.14E-23</b>  |
| Liver-related     | Alanine aminotransferase                          | ALT          | 17419 | 16.92±16.50        | 0.006                            | 0.001 | <b>7.99E-06</b> | 0.010                         | 0.001 | <b>5.51E-18</b>  |
| Hematological     | Neutrophil count                                  | NEU          | 12698 | 6.64±1.81          | 0.073                            | 0.017 | <b>1.75E-05</b> | 0.079                         | 0.012 | <b>8.34E-11</b>  |
| Hematological     | Lymphocyte count                                  | LYM          | 12698 | 1.81±0.50          | 0.245                            | 0.063 | <b>9.11E-05</b> | 0.192                         | 0.044 | <b>1.36E-05</b>  |
| Urinalysis        | Urine PH level                                    | pH           | 18619 | 6.54±0.71          | -0.143                           | 0.038 | <b>1.53E-04</b> | -0.082                        | 0.026 | 1.71E-03         |
| Metabolism        | Oral glucose tolerance test-1 hour                | OGTT1h       | 68    | 9.75±2.81          | 0.734                            | 0.201 | <b>2.68E-04</b> | 1.496                         | 0.056 | <b>2.87E-37</b>  |
| Metabolism        | Oral glucose tolerance test-2 hour                | OGTT2h       | 68    | 8.16±2.65          | 0.727                            | 0.204 | <b>3.54E-04</b> | 1.499                         | 0.087 | <b>4.95E-26</b>  |
| Liver-related     | Total bilirubin                                   | TBIL         | 17417 | 8.43±3.47          | -0.025                           | 0.008 | 2.24E-03        | -0.027                        | 0.005 | <b>8.34E-07</b>  |
| Hormone           | Free triiodothyronine                             | FT3          | 17500 | 3.39±0.77          | 0.086                            | 0.030 | 4.32E-03        | 0.082                         | 0.024 | 5.72E-04         |
| Liver-related     | Direct bilirubin                                  | DBIL         | 17417 | 3.06±1.20          | -0.068                           | 0.024 | 4.49E-03        | -0.090                        | 0.016 | <b>8.04E-09</b>  |
| Hematological     | Monocyte count                                    | MONO         | 12698 | 0.51±0.18          | 0.471                            | 0.167 | 4.66E-03        | 0.360                         | 0.118 | 2.29E-03         |
| Hematological     | Platelet size deviation width                     | PDW          | 18634 | 13.03±2.44         | -0.030                           | 0.011 | 6.56E-03        | -0.025                        | 0.007 | 6.60E-04         |
| Hematological     | Mean platelet volume                              | MPV          | 18634 | 9.95±1.45          | -0.046                           | 0.018 | 1.00E-02        | -0.049                        | 0.013 | <b>9.50E-05</b>  |
| Urinalysis        | Ketones in urine                                  | KET          | 18619 | 6057(32.53%)       | 0.131                            | 0.054 | 1.62E-02        | 0.102                         | 0.039 | 9.13E-03         |
| Hematological     | Mean corpuscular hemoglobin concentration         | MCHC         | 18790 | 332.57±15.96       | 0.004                            | 0.002 | 1.75E-02        | 0.002                         | 0.001 | 5.56E-02         |
| Infection         | C-reactive protein                                | CRP          | 4134  | 5.17±6.45          | 0.017                            | 0.007 | 1.80E-02        | 0.014                         | 0.007 | 3.31E-02         |
| Urinalysis        | Crystals in Urine                                 | X'TAL U      | 18453 | 7.97±117.71        | 0.001                            | 0.000 | 2.21E-02        | 0.000                         | 0.000 | 9.79E-02         |
| Liver-related     | Aspartate aminotransferase                        | AST          | 17417 | 17.70±8.81         | 0.006                            | 0.003 | 2.22E-02        | 0.010                         | 0.002 | <b>1.08E-06</b>  |
| Kidney-related    | Serum creatinine                                  | Cr           | 17807 | 43.45±6.23         | -0.010                           | 0.004 | 2.63E-02        | -0.015                        | 0.003 | <b>3.17E-07</b>  |
| Urinalysis        | Small round epithelial cells in urine             | SRC U        | 18453 | 3.48±4.76          | 0.013                            | 0.006 | 3.18E-02        | 0.009                         | 0.005 | 5.27E-02         |
| Infection         | Hepatitis B envelope antibody                     | HBeAb        | 17851 | 1.41±0.76          | -0.079                           | 0.039 | 4.33E-02        | -0.063                        | 0.024 | 9.01E-03         |
| Protein           | Ferritin                                          | Ferr         | 938   | 82.26±66.15        | 0.003                            | 0.002 | 5.09E-02        | 0.001                         | 0.001 | 3.06E-01         |
| Kidney-related    | Cystatin C                                        | CysC         | 17624 | 0.67±0.16          | 0.325                            | 0.173 | 6.07E-02        | 0.287                         | 0.119 | 1.62E-02         |
| Infection         | Hepatitis B core antibody                         | HBcAb        | 17851 | 1.46±0.86          | -0.051                           | 0.030 | 9.61E-02        | -0.073                        | 0.022 | 7.44E-04         |
| Urinalysis        | Urine specific gravity                            | SG           | 18619 | 1.02±0.01          | 5.653                            | 3.430 | 9.93E-02        | 1.187                         | 2.405 | 6.22E-01         |
| Urinalysis        | Leukocytes esterase in urine                      | LEU          | 18619 | 9282(49.85%)       | -0.076                           | 0.052 | 1.42E-01        | -0.089                        | 0.037 | 1.56E-02         |
| Urinalysis        | Casts in urine                                    | CAST U       | 18452 | 3.17±4.20          | -0.010                           | 0.007 | 1.44E-01        | -0.014                        | 0.005 | 1.79E-03         |
| Urinalysis        | Urine clarity                                     | Clarity      | 18608 | 8491(45.63%)       | -0.076                           | 0.052 | 1.46E-01        | -0.086                        | 0.037 | 1.97E-02         |
| Urinalysis        | Urine conductivity                                | Cond         | 18452 | 18.07±8.34         | -0.004                           | 0.003 | 1.52E-01        | -0.003                        | 0.002 | 2.08E-01         |
| Hormone           | Free thyroxine                                    | FT4          | 17501 | 2.81±5.19          | -0.007                           | 0.005 | 1.62E-01        | -0.005                        | 0.004 | 1.98E-01         |
| Hematological     | Mean corpuscular volume                           | MCV          | 18790 | 88.61±5.43         | -0.006                           | 0.005 | 1.69E-01        | -0.004                        | 0.003 | 1.93E-01         |

|                |                                                      |                |       |                   |        |       |          |        |       |          |
|----------------|------------------------------------------------------|----------------|-------|-------------------|--------|-------|----------|--------|-------|----------|
| Urinalysis     | Protein in urine                                     | PRO            | 18602 | 11542(62.05%)     | 0.072  | 0.054 | 1.86E-01 | 0.047  | 0.038 | 2.11E-01 |
| Protein        | Albumin/globulin ratio                               | AGR            | 17417 | 1.68±0.24         | -0.147 | 0.115 | 1.99E-01 | -0.110 | 0.080 | 1.69E-01 |
| Urinalysis     | Unlysed red blood cell percentage in urine           | Unlysed RBC(%) | 18453 | 68.27±22.97       | -0.001 | 0.001 | 2.03E-01 | 0.000  | 0.001 | 8.09E-01 |
| Electrolyte    | Sodium                                               | Na             | 150   | 137.15±2.33       | 0.209  | 0.183 | 2.54E-01 | -0.013 | 0.076 | 8.69E-01 |
| Protein        | Globulin                                             | GLB            | 17417 | 26.73±3.16        | 0.010  | 0.008 | 2.56E-01 | 0.008  | 0.006 | 1.78E-01 |
| Hematological  | Neutrophil percentage                                | NEU%           | 12698 | 72.67±5.89        | 0.006  | 0.006 | 2.84E-01 | 0.009  | 0.004 | 2.23E-02 |
| Protein        | Total protein                                        | TP             | 17417 | 70.89±3.83        | 0.007  | 0.007 | 2.97E-01 | 0.005  | 0.005 | 3.48E-01 |
| Metabolism     | Vitamin D                                            | Vit D          | 1401  | 19.60±6.93        | -0.012 | 0.012 | 2.98E-01 | 0.000  | 0.009 | 9.74E-01 |
| Hematological  | Red cell distribution width-coefficient of variation | RDW-CV         | 18782 | 13.31±1.37        | -0.020 | 0.020 | 3.07E-01 | -0.016 | 0.013 | 2.37E-01 |
| Infection      | Cytomegalovirus IgG antibody                         | CMV IgG        | 6928  | 6445(93.03%)      | 0.176  | 0.174 | 3.11E-01 | 0.133  | 0.118 | 2.57E-01 |
| Infection      | Hepatitis B envelope antigen                         | HBeAg          | 17851 | 10.88±140.44      | 0.000  | 0.000 | 3.18E-01 | 0.000  | 0.000 | 3.44E-01 |
| Hormone        | β-human chorionic gonadotropin                       | β-hCG          | 8250  | 36380.08±48609.71 | 0.000  | 0.000 | 3.24E-01 | 0.000  | 0.000 | 2.72E-01 |
| Urinalysis     | Bacteria count in urine                              | BACT U         | 18606 | 1037.48±2397.54   | 0.000  | 0.000 | 3.74E-01 | 0.000  | 0.000 | 2.32E-02 |
| Urinalysis     | Bilirubin in urine                                   | BIL            | 18619 | 129(0.69%)        | 0.242  | 0.279 | 3.85E-01 | -0.372 | 0.215 | 8.39E-02 |
| Hematological  | Lymphocyte percentage                                | LYM%           | 12698 | 20.41±5.07        | -0.005 | 0.006 | 3.96E-01 | -0.009 | 0.004 | 4.06E-02 |
| Hematological  | Eosinophil percentage                                | EOS%           | 12698 | 1.05±1.01         | -0.028 | 0.033 | 3.98E-01 | -0.013 | 0.022 | 5.50E-01 |
| Infection      | Rubella IgM antibody                                 | Rub IgM        | 8675  | 72(0.83%)         | -0.381 | 0.467 | 4.15E-01 | -0.160 | 0.278 | 5.66E-01 |
| Infection      | Rubella IgG antibody                                 | Rub IgG        | 7250  | 5765(79.52%)      | -0.074 | 0.099 | 4.58E-01 | -0.066 | 0.071 | 3.54E-01 |
| Hematological  | Monocyte percentage                                  | MONO%          | 12698 | 5.67±1.77         | -0.012 | 0.018 | 4.95E-01 | -0.021 | 0.012 | 9.51E-02 |
| Urinalysis     | White blood cell count in urine                      | WBC U          | 18607 | 72.35±270.76      | 0.000  | 0.000 | 5.04E-01 | 0.000  | 0.000 | 5.69E-01 |
| Infection      | Herpes simplex virus type 2 specific IgM antibody    | HSV-2 IgM      | 6592  | 18(0.27%)         | 0.371  | 0.770 | 6.30E-01 | -0.539 | 0.627 | 3.90E-01 |
| Liver-related  | Total bile acid                                      | TBA            | 230   | 2.36±2.82         | -0.069 | 0.150 | 6.46E-01 | 0.037  | 0.078 | 6.39E-01 |
| Electrolyte    | Calcium                                              | Ca             | 150   | 2.36±0.10         | 1.504  | 3.602 | 6.76E-01 | -2.491 | 1.669 | 1.38E-01 |
| Hematological  | Mean corpuscular hemoglobin                          | MCH            | 18790 | 29.45±1.94        | 0.005  | 0.013 | 6.87E-01 | 0.001  | 0.009 | 9.20E-01 |
| Hematological  | Basophil count                                       | BASO           | 12698 | 0.02±0.04         | 0.237  | 0.596 | 6.91E-01 | 1.095  | 0.544 | 4.43E-02 |
| Hematological  | Eosinophil count                                     | EOS            | 12698 | 0.10±0.10         | 0.110  | 0.322 | 7.31E-01 | 0.170  | 0.225 | 4.48E-01 |
| Infection      | Hepatitis B surface antibody                         | HBsAb          | 17851 | 335.96±390.31     | 0.000  | 0.000 | 7.42E-01 | 0.000  | 0.000 | 6.38E-01 |
| Hormone        | Thyroid-stimulating hormone                          | TSH            | 17627 | 1.52±2.16         | -0.004 | 0.014 | 7.50E-01 | -0.005 | 0.008 | 5.80E-01 |
| Urinalysis     | Red blood cell count in urine                        | RBC U          | 18607 | 28.61±176.91      | 0.000  | 0.000 | 7.88E-01 | 0.000  | 0.000 | 3.11E-01 |
| Urinalysis     | Epithelial cell count in urine                       | EC U           | 18452 | 36.36±44.17       | 0.000  | 0.001 | 7.90E-01 | 0.000  | 0.000 | 4.56E-01 |
| Kidney-related | Blood urea nitrogen                                  | BUN            | 17807 | 2.77±0.74         | 0.009  | 0.036 | 8.00E-01 | 0.007  | 0.025 | 7.85E-01 |
| Infection      | Toxoplasma gondii IgG antibody                       | TOX IgG        | 6974  | 553(7.93%)        | -0.043 | 0.171 | 8.01E-01 | -0.071 | 0.121 | 5.55E-01 |
| Electrolyte    | Chloride                                             | CL             | 150   | 100.65±3.02       | 0.031  | 0.126 | 8.07E-01 | 0.093  | 0.057 | 1.07E-01 |
| Infection      | Hepatitis C virus antibody                           | Anti-HCV       | 18244 | 0.19±3.01         | 0.002  | 0.009 | 8.28E-01 | 0.004  | 0.006 | 5.64E-01 |
| Urinalysis     | Nitrites in urine                                    | NIT            | 18619 | 176(0.95%)        | 0.053  | 0.267 | 8.43E-01 | -0.079 | 0.192 | 6.81E-01 |
| Urinalysis     | Fibers in urine                                      | FIBERS         | 18608 | 2.03±8.55         | 0.001  | 0.003 | 8.55E-01 | 0.000  | 0.002 | 9.90E-01 |
| Urinalysis     | Yeast-like cell in urine                             | YLC            | 18608 | 3.39±24.87        | 0.000  | 0.001 | 8.57E-01 | 0.000  | 0.001 | 9.85E-01 |
| Protein        | Albumin                                              | ALB            | 17417 | 44.17±2.52        | 0.002  | 0.011 | 8.74E-01 | -0.002 | 0.007 | 7.92E-01 |
| Electrolyte    | Potassium                                            | K              | 150   | 3.92±0.40         | 0.128  | 0.821 | 8.76E-01 | 0.276  | 0.403 | 4.96E-01 |
| Urinalysis     | Urinary tract infection                              | UTI            | 18453 | 13304(72.10%)     | 0.009  | 0.058 | 8.78E-01 | 0.019  | 0.041 | 6.46E-01 |
| Urinalysis     | Lysed red blood cell percentage in urine             | Lysed RBC(%)   | 18453 | 5.18±13.95        | 0.000  | 0.002 | 8.80E-01 | 0.000  | 0.001 | 7.52E-01 |
| Infection      | Toxoplasma gondii IgM antibody                       | TOX IgM        | 6975  | 19(0.27%)         | -0.128 | 1.055 | 9.03E-01 | 0.213  | 0.718 | 7.66E-01 |
| Hematological  | Basophil percentage                                  | BASO%          | 12698 | 0.20±0.24         | 0.014  | 0.114 | 9.04E-01 | 0.153  | 0.085 | 7.25E-02 |
| Hematological  | Red cell distribution width-standard deviation       | RDW-SD         | 15799 | 41.60±3.24        | -0.001 | 0.009 | 9.26E-01 | 0.000  | 0.006 | 9.64E-01 |
| Urinalysis     | Urobilinogen                                         | UBG            | 18619 | 1376(7.39%)       | -0.006 | 0.100 | 9.51E-01 | -0.161 | 0.070 | 2.22E-02 |
| Urinalysis     | Blood in urine                                       | BLD            | 18619 | 4787(25.71%)      | -0.003 | 0.059 | 9.54E-01 | 0.052  | 0.042 | 2.14E-01 |
| Infection      | Cytomegalovirus IgM antibody                         | CMV IgM        | 6929  | 36(0.52%)         | -0.013 | 1.062 | 9.90E-01 | 0.806  | 0.757 | 2.87E-01 |

**Table S2. The multiple regression results of GDM status with potential risk factors, related to Table 1**

|                            |                               |               |          |                 |
|----------------------------|-------------------------------|---------------|----------|-----------------|
| <b>Model:</b>              | Logit                         |               |          |                 |
| <b>Method:</b>             | Maximum Likelihood Estimation |               |          |                 |
| <b>Df Model:</b>           | 20                            |               |          |                 |
| <b>No. Observations:</b>   | 3472                          |               |          |                 |
| <b>Pseudo R-squared:</b>   | 0.132                         |               |          |                 |
| <b>Log-Likelihood:</b>     | -872.266                      |               |          |                 |
| <b>LL-Null:</b>            | -970.913                      |               |          |                 |
| <b>Prob (F-statistic):</b> | 3.86E-31                      |               |          |                 |
| <b>variables</b>           | <b>coef</b>                   | <b>stderr</b> | <b>z</b> | <b>P&gt; z </b> |
| Intercept                  | -12.524                       | 1.597         | -7.841   | 4.46E-15        |
| Age                        | 0.122                         | 0.019         | 6.311    | <b>2.78E-10</b> |
| GLU U                      | 0.907                         | 0.176         | 5.156    | <b>2.52E-07</b> |
| GGT                        | 0.031                         | 0.006         | 4.721    | <b>2.35E-06</b> |
| UA                         | 0.006                         | 0.001         | 4.075    | <b>4.61E-05</b> |
| PA                         | 0.007                         | 0.002         | 3.555    | <b>3.78E-04</b> |
| ALT                        | -0.016                        | 0.006         | -2.701   | 6.90E-03        |
| BMI                        | 0.032                         | 0.02          | 1.556    | 1.20E-01        |
| HTN                        | 0.533                         | 0.406         | 1.312    | 1.89E-01        |
| ALP                        | 0.009                         | 0.007         | 1.294    | 1.96E-01        |
| FTP                        | -0.166                        | 0.146         | -1.135   | 2.56E-01        |
| HGB                        | 0.016                         | 0.017         | 0.941    | 3.47E-01        |
| NEU                        | 0.18                          | 0.229         | 0.788    | 4.31E-01        |
| WBC                        | -0.148                        | 0.219         | -0.674   | 5.01E-01        |
| RBC                        | -0.195                        | 0.32          | -0.61    | 5.42E-01        |
| PLT                        | 0.004                         | 0.008         | 0.53     | 5.96E-01        |
| LYM                        | 0.153                         | 0.297         | 0.514    | 6.07E-01        |
| pH                         | 0.046                         | 0.095         | 0.478    | 6.33E-01        |
| P-LCR                      | 0.008                         | 0.023         | 0.34     | 7.34E-01        |
| PCT                        | -2.755                        | 8.146         | -0.338   | 7.35E-01        |
| HCT                        | 0.007                         | 0.06          | 0.12     | 9.05E-01        |

*Notes:* HTN, FTP, Age and BMI are abbreviations for hypertension, first-time pregnancy, maternal age and body mass index, respectively. The full names of other abbreviations are provided in [Table S1](#).

**Table S3. The multiple regression analysis of GDM AUC with potential risk factors, related to Table 1**

|                            |                       |               |          |                 |
|----------------------------|-----------------------|---------------|----------|-----------------|
| <b>Model:</b>              | Ordinary Least Square |               |          |                 |
| <b>Method:</b>             | Least Squares         |               |          |                 |
| <b>Df Model:</b>           | 24                    |               |          |                 |
| <b>No. Observations:</b>   | 3472                  |               |          |                 |
| <b>R-squared:</b>          | 0.132                 |               |          |                 |
| <b>F-statistic:</b>        | 21.783                |               |          |                 |
| <b>Prob (F-statistic):</b> | 4.50E-88              |               |          |                 |
| <b>variables</b>           | <b>coef</b>           | <b>stderr</b> | <b>z</b> | <b>P&gt; z </b> |
| Intercept                  | 4.202                 | 2.287         | 1.837    | 6.62E-02        |
| Age                        | 0.123                 | 0.011         | 11.186   | <b>1.47E-28</b> |
| UA                         | 0.005                 | 0.001         | 6.193    | <b>6.61E-10</b> |
| PA                         | 0.006                 | 0.001         | 5.559    | <b>2.92E-08</b> |
| GLU U                      | 0.625                 | 0.114         | 5.491    | <b>4.28E-08</b> |
| Cr                         | -0.032                | 0.006         | -5.416   | <b>6.52E-08</b> |
| GGT                        | 0.023                 | 0.005         | 5.035    | <b>5.02E-07</b> |
| DBIL                       | -0.387                | 0.095         | -4.074   | <b>4.73E-05</b> |
| BMI                        | 0.046                 | 0.012         | 3.887    | <b>1.04E-04</b> |
| TBIL                       | 0.115                 | 0.033         | 3.477    | <b>5.14E-04</b> |
| AST                        | -0.029                | 0.009         | -3.036   | 2.41E-03        |
| ALT                        | 0.014                 | 0.005         | 2.727    | 6.43E-03        |
| FTP                        | -0.096                | 0.075         | -1.277   | 2.02E-01        |
| HGB                        | 0.008                 | 0.009         | 0.902    | 3.67E-01        |
| PLT                        | 0.004                 | 0.005         | 0.872    | 3.83E-01        |
| HTN                        | 0.247                 | 0.316         | 0.780    | 4.35E-01        |
| PCT                        | -3.295                | 4.788         | -0.688   | 4.91E-01        |
| MPV                        | 0.186                 | 0.294         | 0.633    | 5.27E-01        |
| ALP                        | -0.002                | 0.004         | -0.615   | 5.39E-01        |
| NEU                        | 0.053                 | 0.131         | 0.403    | 6.87E-01        |
| P-LCR                      | -0.013                | 0.035         | -0.375   | 7.07E-01        |
| WBC                        | -0.033                | 0.125         | -0.266   | 7.90E-01        |
| LYM                        | -0.015                | 0.165         | -0.089   | 9.29E-01        |
| HCT                        | 0.002                 | 0.031         | 0.059    | 9.53E-01        |
| RBC                        | 0.007                 | 0.159         | 0.047    | 9.63E-01        |

*Notes:* HTN, FTP, Age and BMI are abbreviations for hypertension, first-time pregnancy, maternal age and body mass index, respectively. The full names of other abbreviations are provided in [Table S1](#).

Table S4. Correlation tests between GDM traits and clinical diagnosis, related to Table 1

| Traits info                                 | n(%)         |              |                | GDM status  |                 | GDM AUC |                 |
|---------------------------------------------|--------------|--------------|----------------|-------------|-----------------|---------|-----------------|
|                                             | Name         | All samples  | In GDM control | In GDM case | OR              | Pvalue  | T               |
| Pregnancy with uterine scar, n(%)           | 1844(11.34%) | 1583(10.98%) | 261(14.22%)    | 1.344       | <b>4.50E-05</b> | 6.883   | <b>6.08E-12</b> |
| Premature rupture of membranes, n(%)        | 2469(15.19%) | 2266(15.72%) | 203(11.06%)    | 0.667       | <b>1.95E-07</b> | -3.211  | <b>1.33E-03</b> |
| Intrauterine distress, n(%)                 | 1419(8.73%)  | 1306(9.06%)  | 113(6.15%)     | 0.658       | <b>4.02E-05</b> | -4.023  | <b>5.77E-05</b> |
| Threatened preterm birth, n(%)              | 404(2.49%)   | 348(2.41%)   | 56(3.05%)      | 1.272       | 1.16E-01        | 2.516   | 1.19E-02        |
| Threatened abortion, n(%)                   | 319(1.96%)   | 278(1.93%)   | 41(2.23%)      | 1.162       | 4.25E-01        | 2.256   | 2.41E-02        |
| Eclampsia, n(%)                             | 220(1.35%)   | 182(1.26%)   | 38(2.07%)      | 1.653       | 6.67E-03        | 5.272   | <b>1.37E-07</b> |
| Gestational hypertension, n(%)              | 224(1.38%)   | 198(1.37%)   | 26(1.42%)      | 1.032       | 9.66E-01        | 3.795   | <b>1.48E-04</b> |
| Ineffective uterine contractions, n(%)      | 287(1.77%)   | 266(1.84%)   | 21(1.14%)      | 0.616       | 4.00E-02        | 0.583   | 5.60E-01        |
| Oligohydramnios, n(%)                       | 371(2.28%)   | 346(2.40%)   | 25(1.36%)      | 0.561       | 6.49E-03        | -2.156  | 3.11E-02        |
| Nuchal cord, n(%)                           | 773(4.76%)   | 758(5.26%)   | 15(0.82%)      | 0.148       | <b>6.22E-17</b> | -6.399  | <b>1.61E-10</b> |
| Intrahepatic cholestasis of pregnancy, n(%) | 112(0.69%)   | 98(0.68%)    | 14(0.76%)      | 1.123       | 7.99E-01        | -0.631  | 5.28E-01        |
| Pregnancy with vomiting, n(%)               | 132(0.81%)   | 120(0.83%)   | 12(0.65%)      | 0.784       | 5.06E-01        | -3.924  | <b>8.75E-05</b> |
| Pregnancy with uterine fibroids, n(%)       | 96(0.59%)    | 83(0.58%)    | 13(0.71%)      | 1.232       | 5.92E-01        | 1.282   | 2.00E-01        |
| fetal abnormalities, n(%)                   | 122(0.75%)   | 110(0.76%)   | 12(0.65%)      | 0.856       | 7.13E-01        | -0.969  | 3.32E-01        |
| Cervical polyps, n(%)                       | 68(0.42%)    | 56(0.39%)    | 12(0.65%)      | 1.687       | 1.43E-01        | 1.061   | 2.89E-01        |



Table S5. Identified associated loci from GWAS, related to Figures 1-2

| Trait   | Locus INFO |       |           |           |        |           | Top SNP INFO                 |           |            |            |          |              |       |
|---------|------------|-------|-----------|-----------|--------|-----------|------------------------------|-----------|------------|------------|----------|--------------|-------|
|         | name       | chrom | start     | end       | width  | snp_count | locus_gene                   | pos       | SNP        | gene       | pvalue   | beta/log(OR) | se    |
| GDM     |            | 6     | 20623948  | 20724019  | 100072 | 54        | CDKAL1                       | 20675561  | rs35261542 | CDKAL1     | 3.88E-12 | 0.306        | 0.044 |
| GDM     |            | 11    | 92980604  | 92980604  | 1      | 1         | MTNR1B                       | 92980604  | rs3781637  | MTNR1B     | 3.29E-09 | -0.676       | 0.114 |
| GDM_AUC |            | 6     | 20614483  | 20829886  | 215404 | 76        | CDKAL1                       | 20680447  | rs9348441  | CDKAL1     | 1.40E-30 | 0.155        | 0.013 |
| GDM_AUC |            | 7     | 128203335 | 128217273 | 13939  | 13        | MIR129-1                     | 128212012 | rs11981584 | <MIR129-1  | 2.74E-10 | 0.284        | 0.045 |
| GDM_AUC |            | 9     | 4291435   | 4307369   | 15935  | 3         | RNU6-694P                    | 4307369   | rs79321323 | RNU6-694P> | 2.41E-12 | 0.262        | 0.037 |
| GDM_AUC |            | 10    | 92492827  | 92664301  | 171475 | 12        | IDE, KIF11, EIF2S2P3         | 92627577  | rs1573051  | KIF11      | 8.97E-11 | 0.090        | 0.014 |
| GDM_AUC |            | 11    | 92934966  | 92994860  | 59895  | 11        | SNRPGP16, MTNR1B             | 92980604  | rs3781637  | MTNR1B     | 2.09E-31 | -0.378       | 0.032 |
| 0hGlu   |            | 2     | 168797218 | 168956919 | 159702 | 3         | NOSTRIN, ABCB11              | 168797218 | rs12612019 | NOSTRIN>   | 1.05E-08 | -0.707       | 0.123 |
| 0hGlu   |            | 5     | 96379021  | 96428986  | 49966  | 9         | PCSK1                        | 96383972  | rs10213823 | PCSK1>     | 3.72E-11 | -0.091       | 0.014 |
| 0hGlu   |            | 6     | 20664850  | 20713683  | 48834  | 11        | CDKAL1                       | 20680447  | rs9348441  | CDKAL1     | 1.57E-09 | 0.083        | 0.014 |
| 0hGlu   |            | 6     | 152026723 | 152047623 | 20901  | 15        | ESR1                         | 152036096 | rs3020430  | ESR1       | 1.36E-08 | 0.074        | 0.013 |
| 0hGlu   |            | 7     | 44078957  | 44137627  | 58671  | 8         | POLM, POLD2, RNA5SP230, MYL7 | 44124463  | rs3217944  | <POLD2     | 3.57E-13 | -0.116       | 0.016 |
| 0hGlu   |            | 9     | 627420    | 679916    | 52497  | 23        | KANK1                        | 655864    | rs75885458 | KANK1      | 4.78E-09 | 0.171        | 0.029 |
| 0hGlu   |            | 9     | 4291435   | 4291435   | 1      | 1         | RNU6-694P                    | 4291435   | rs57132962 | RNU6-694P> | 1.07E-09 | 0.306        | 0.050 |
| 0hGlu   |            | 11    | 92948256  | 92994860  | 46605  | 5         | SNRPGP16, MTNR1B             | 92980604  | rs3781637  | MTNR1B     | 9.10E-16 | -0.264       | 0.033 |
| 0hGlu   |            | 20    | 22540023  | 22625059  | 85037  | 48        | LINC00261, FOXA2, LNCNEF     | 22580744  | rs6048206  | FOXA2>     | 2.34E-11 | -0.122       | 0.018 |
| 1hGlu   |            | 6     | 20620906  | 20724019  | 103114 | 58        | CDKAL1                       | 20675561  | rs35261542 | CDKAL1     | 7.41E-25 | 0.139        | 0.014 |
| 1hGlu   |            | 7     | 128205603 | 128212012 | 6410   | 7         | MIR129-1                     | 128212012 | rs11981584 | <MIR129-1  | 5.58E-09 | 0.264        | 0.045 |
| 1hGlu   |            | 9     | 4307369   | 4307369   | 1      | 1         | RNU6-694P                    | 4307369   | rs79321323 | RNU6-694P> | 9.89E-09 | 0.215        | 0.037 |
| 1hGlu   |            | 10    | 92492827  | 92664301  | 171475 | 12        | IDE, KIF11, EIF2S2P3         | 92627577  | rs1573051  | KIF11      | 1.50E-10 | 0.090        | 0.014 |
| 1hGlu   |            | 11    | 92936503  | 92994860  | 58358  | 10        | SNRPGP16, MTNR1B             | 92980604  | rs3781637  | MTNR1B     | 5.09E-27 | -0.351       | 0.033 |
| 2hGlu   |            | 6     | 20620906  | 20829886  | 208981 | 63        | CDKAL1                       | 20680447  | rs9348441  | CDKAL1     | 4.61E-25 | 0.140        | 0.014 |
| 2hGlu   |            | 9     | 4291435   | 4307369   | 15935  | 3         | RNU6-694P                    | 4291435   | rs57132962 | RNU6-694P> | 7.22E-13 | 0.357        | 0.050 |
| 2hGlu   |            | 10    | 69215297  | 69215297  | 1      | 1         | HKDC1                        | 69215297  | rs58433451 | HKDC1>     | 6.64E-09 | -0.638       | 0.110 |
| 2hGlu   |            | 11    | 92948256  | 92994245  | 45990  | 5         | SNRPGP16, MTNR1B             | 92980604  | rs3781637  | MTNR1B     | 5.31E-18 | -0.281       | 0.032 |

**Table S6. The summary of GDM associated SNP, related to Figure 2**

| <b>SNP</b>                     | <b>rs35261542</b> | <b>rs3781637</b> | <b>rs7754840</b> | <b>rs9348441</b> | <b>rs10830962</b>  | <b>rs10830963</b>  |
|--------------------------------|-------------------|------------------|------------------|------------------|--------------------|--------------------|
| <b>Chr</b>                     | 6                 | 11               | 6                | 6                | 11                 | 11                 |
| <b>Pos</b>                     | 20675561          | 92980604         | 20661019         | 20680447         | 92965261           | 92975544           |
| <b>Gene</b>                    | <i>CDKALI</i>     | <i>MTNR1B</i>    | <i>CDKALI</i>    | <i>CDKALI</i>    | <i>MTNR1B</i>      | <i>MTNR1B</i>      |
| <b>A1</b>                      | A                 | C                | C                | A                | G                  | G                  |
| <b>A1 freq</b>                 | 0.3729            | 0.1409           | 0.3875           | 0.3606           | 0.4322             | 0.4207             |
| <b>Freq EAS</b>                | 0.3859            | 0.1349           | 0.4008           | 0.3869           | 0.4296             | 0.4226             |
| <b>Freq EUR</b>                | 0.2793            | 0.0089           | 0.3181           | 0.2783           | 0.4125             | 0.2883             |
| <b>pv in GDM status</b>        | 3.88E-12          | 3.29E-09         | 4.90E-11         | 4.00E-12         | NA                 | NA                 |
| <b>pv in GDM<sub>AUC</sub></b> | 1.97E-30          | 2.09E-31         | 3.22E-27         | 1.40E-30         | NA                 | NA                 |
| <b>pv in GCST90239750</b>      | 2.36E-14          | 2.97E-01         | 1.51E-11         | 1.57E-14         | 3.01E-37           | 4.30E-54           |
| <b>HWE</b>                     | 1.33E-02          | 8.31E-02         | 1.59E-03         | 4.24E-01         | 0.00E+00           | 0.00E+00           |
| <b>Note</b>                    |                   |                  |                  |                  | removed due to HWE | removed due to HWE |

*Notes* : A1 freq indicates the allele frequency of A1 allele, and HWE indicates hardy-Weinberg equilibrium p-value for each SNP. The Freq EAS and Freq EUR are allele frequencies in EAS and EUR population, respectively, obtained from 1000 genomes project phase 3.

Table S7. Detailed information of studies downloaded from the GWAS catalog, related to Figures 5-6

| Index | GWAS catalog study ID | Trait name                          | Journal       | Title                                                                                                                                                                        | Population                                                                                                                               | Publication date | URL                                                                                                                                                                                                               |
|-------|-----------------------|-------------------------------------|---------------|------------------------------------------------------------------------------------------------------------------------------------------------------------------------------|------------------------------------------------------------------------------------------------------------------------------------------|------------------|-------------------------------------------------------------------------------------------------------------------------------------------------------------------------------------------------------------------|
| 1     | GCST90018959          | Height                              | Nat Genet     | A cross-population atlas of genetic associations for 220 human phenotypes. <sup>1</sup>                                                                                      | 360,388 European ancestry individuals, 165,056 East Asian ancestry individuals                                                           | 2021/9/30        | <a href="http://ftp.ebi.ac.uk/pub/databases/gwas/summary_statistics/GCST90018001-GCST90019000/GCST90018959">http://ftp.ebi.ac.uk/pub/databases/gwas/summary_statistics/GCST90018001-GCST90019000/GCST90018959</a> |
| 2     | GCST90018949          | Weight                              | Nat Genet     | A cross-population atlas of genetic associations for 220 human phenotypes. <sup>1</sup>                                                                                      | 360,116 European ancestry individuals, 165,419 East Asian ancestry individuals                                                           | 2021/9/30        | <a href="http://ftp.ebi.ac.uk/pub/databases/gwas/summary_statistics/GCST90018001-GCST90019000/GCST90018949">http://ftp.ebi.ac.uk/pub/databases/gwas/summary_statistics/GCST90018001-GCST90019000/GCST90018949</a> |
| 3     | GCST90000025          | Appendicular lean mass              | Commun Biol   | The genetic architecture of appendicular lean mass characterized by association analysis in the UK Biobank study. <sup>2</sup>                                               | 450243 European                                                                                                                          | 2020/10/23       | <a href="http://ftp.ebi.ac.uk/pub/databases/gwas/summary_statistics/GCST90000001-GCST90001000/GCST90000025">http://ftp.ebi.ac.uk/pub/databases/gwas/summary_statistics/GCST90000001-GCST90001000/GCST90000025</a> |
| 4     | GCST90020028          | Hip circumference adjusted for BMI  | Sci Rep       | GWAS of allometric body-shape indices in UK Biobank identifies loci suggesting associations with morphogenesis, organogenesis, adrenal cell renewal and cancer. <sup>3</sup> | 219872 European                                                                                                                          | 2021/5/21        | <a href="http://ftp.ebi.ac.uk/pub/databases/gwas/summary_statistics/GCST90020001-GCST90021000/GCST90020028">http://ftp.ebi.ac.uk/pub/databases/gwas/summary_statistics/GCST90020001-GCST90021000/GCST90020028</a> |
| 5     | GCST006979            | Heel bone mineral density           | Nat Genet     | An atlas of genetic influences on osteoporosis in humans and mice. <sup>4</sup>                                                                                              | 426824 European                                                                                                                          | 2018/12/31       | <a href="http://ftp.ebi.ac.uk/pub/databases/gwas/summary_statistics/GCST006001-GCST007000/GCST006979">http://ftp.ebi.ac.uk/pub/databases/gwas/summary_statistics/GCST006001-GCST007000/GCST006979</a>             |
| 6     | GCST006655            | Breast size                         | Sci Rep       | Japanese GWAS identifies variants for bust-size, dysmenorrhea, and menstrual fever that are eQTLs for relevant protein-coding or long non-coding RNAs. <sup>5</sup>          | 5,609 Japanese ancestry female individuals                                                                                               | 2018/5/31        | <a href="http://ftp.ebi.ac.uk/pub/databases/gwas/summary_statistics/GCST006001-GCST007000/GCST006655">http://ftp.ebi.ac.uk/pub/databases/gwas/summary_statistics/GCST006001-GCST007000/GCST006655</a>             |
| 7     | GCST90018972          | Systolic blood pressure             | Nat Genet     | A cross-population atlas of genetic associations for 220 human phenotypes. <sup>1</sup>                                                                                      | 340,159 European ancestry individuals, 145,505 East Asian ancestry individuals                                                           | 2021/9/30        | <a href="http://ftp.ebi.ac.uk/pub/databases/gwas/summary_statistics/GCST90018001-GCST90019000/GCST90018972">http://ftp.ebi.ac.uk/pub/databases/gwas/summary_statistics/GCST90018001-GCST90019000/GCST90018972</a> |
| 8     | GCST90018952          | Diastolic blood pressure            | Nat Genet     | A cross-population atlas of genetic associations for 220 human phenotypes. <sup>1</sup>                                                                                      | 340,162 European ancestry individuals, 145,515 East Asian ancestry individuals                                                           | 2021/9/30        | <a href="http://ftp.ebi.ac.uk/pub/databases/gwas/summary_statistics/GCST90018001-GCST90019000/GCST90018952">http://ftp.ebi.ac.uk/pub/databases/gwas/summary_statistics/GCST90018001-GCST90019000/GCST90018952</a> |
| 9     | GCST90018970          | Pulse pressure                      | Nat Genet     | A cross-population atlas of genetic associations for 220 human phenotypes. <sup>1</sup>                                                                                      | 360,863 European ancestry individuals, 145,445 East Asian ancestry individuals                                                           | 2021/9/30        | <a href="http://ftp.ebi.ac.uk/pub/databases/gwas/summary_statistics/GCST90018001-GCST90019000/GCST90018970">http://ftp.ebi.ac.uk/pub/databases/gwas/summary_statistics/GCST90018001-GCST90019000/GCST90018970</a> |
| 10    | GCST90019516          | Serum phosphate levels              | Nat Genet     | Genetics of 35 blood and urine biomarkers in the UK Biobank. <sup>6</sup>                                                                                                    | 312888 European, 5568 African unspecified, 6685 South Asian                                                                              | 2021/1/18        | <a href="http://ftp.ebi.ac.uk/pub/databases/gwas/summary_statistics/GCST90019001-GCST90020000/GCST90019516">http://ftp.ebi.ac.uk/pub/databases/gwas/summary_statistics/GCST90019001-GCST90020000/GCST90019516</a> |
| 11    | GCST90018976          | Serum total protein level           | Nat Genet     | A cross-population atlas of genetic associations for 220 human phenotypes. <sup>1</sup>                                                                                      | 314,921 European ancestry individuals, 133,321 East Asian ancestry individuals                                                           | 2021/9/30        | <a href="http://ftp.ebi.ac.uk/pub/databases/gwas/summary_statistics/GCST90018001-GCST90019000/GCST90018976">http://ftp.ebi.ac.uk/pub/databases/gwas/summary_statistics/GCST90018001-GCST90019000/GCST90018976</a> |
| 12    | GCST90019511          | Insulin-like growth factor 1 levels | Nat Genet     | Genetics of 35 blood and urine biomarkers in the UK Biobank. <sup>6</sup>                                                                                                    | 340,567 European ancestry individuals, 5,974 African ancestry individuals, 7,283 South Asian ancestry individuals                        | 2021/1/18        | <a href="http://ftp.ebi.ac.uk/pub/databases/gwas/summary_statistics/GCST90019001-GCST90020000/GCST90019511">http://ftp.ebi.ac.uk/pub/databases/gwas/summary_statistics/GCST90019001-GCST90020000/GCST90019511</a> |
| 13    | GCST90018799          | Breast cancer                       | Nat Genet     | A cross-population atlas of genetic associations for 220 human phenotypes. <sup>1</sup>                                                                                      | 17,389 European ancestry cases, 240,341 European ancestry controls, 6,325 East Asian ancestry cases, 73,225 East Asian ancestry controls | 2021/9/30        | <a href="http://ftp.ebi.ac.uk/pub/databases/gwas/summary_statistics/GCST90018001-GCST90019000/GCST90018799">http://ftp.ebi.ac.uk/pub/databases/gwas/summary_statistics/GCST90018001-GCST90019000/GCST90018799</a> |
| 14    | GCST90000047          | Age at first sexual intercourse     | Nat Hum Behav | Identification of 371 genetic variants for age at first sex and birth linked to externalising behaviour. <sup>7</sup>                                                        | 397338 European                                                                                                                          | 2021/7/1         | <a href="http://ftp.ebi.ac.uk/pub/databases/gwas/summary_statistics/GCST90000001-GCST90001000/GCST90000047">http://ftp.ebi.ac.uk/pub/databases/gwas/summary_statistics/GCST90000001-GCST90001000/GCST90000047</a> |
| 15    | GCST90011804          | Breast cancer                       | Nat Commun    | Pan-cancer study detects genetic risk variants and shared genetic basis in two large cohorts. <sup>8</sup>                                                                   | 428231 European                                                                                                                          | 2020/9/4         | <a href="http://ftp.ebi.ac.uk/pub/databases/gwas/summary_statistics/GCST90011001-GCST90012000/GCST90011804">http://ftp.ebi.ac.uk/pub/databases/gwas/summary_statistics/GCST90011001-GCST90012000/GCST90011804</a> |

**Table S8. Genetic correlation between glycemc traits and ESR1-associated traits, related to Figure 5**

| Traits info           |                                     | 0hGlu  |         |        |                 | GDM status |         |        |          | GDM AUC |         |        |          |
|-----------------------|-------------------------------------|--------|---------|--------|-----------------|------------|---------|--------|----------|---------|---------|--------|----------|
| GWAS catalog study ID | Traits name                         | Rg     | Stderr. | Zscore | Pvalue          | Rg         | Stderr. | Zscore | Pvalue   | Rg      | Stderr. | Zscore | Pvalue   |
| GCST90018952          | Diastolic blood pressure            | 0.259  | 0.080   | 3.219  | <b>1.30E-03</b> | 0.483      | 0.377   | 1.280  | 2.01E-01 | 0.190   | 0.070   | 2.734  | 6.30E-03 |
| GCST90018972          | Systolic blood pressure             | 0.244  | 0.069   | 3.512  | <b>4.00E-04</b> | 0.358      | 0.289   | 1.236  | 2.17E-01 | 0.185   | 0.070   | 2.662  | 7.80E-03 |
| GCST90018949          | Weight                              | 0.169  | 0.060   | 2.810  | 5.00E-03        | 0.202      | 0.187   | 1.082  | 2.80E-01 | 0.037   | 0.062   | 0.598  | 5.50E-01 |
| GCST006979            | Heel bone mineral density           | 0.069  | 0.058   | 1.194  | 2.33E-01        | 0.164      | 0.200   | 0.817  | 4.14E-01 | 0.044   | 0.058   | 0.754  | 4.51E-01 |
| GCST90000047          | Age at first sexual intercourse     | -0.062 | 0.061   | -1.012 | 3.12E-01        | -0.121     | 0.154   | -0.786 | 4.32E-01 | -0.029  | 0.052   | -0.553 | 5.80E-01 |
| GCST90019516          | Serum phosphate levels              | -0.455 | 0.282   | -1.613 | 1.07E-01        | -0.240     | 0.307   | -0.781 | 4.35E-01 | -0.012  | 0.127   | -0.091 | 9.27E-01 |
| GCST90018970          | Pulse pressure                      | 0.129  | 0.064   | 2.005  | 4.50E-02        | 0.098      | 0.156   | 0.626  | 5.31E-01 | 0.110   | 0.070   | 1.565  | 1.18E-01 |
| GCST90018976          | Serum total protein level           | -0.032 | 0.080   | -0.393 | 6.94E-01        | -0.108     | 0.174   | -0.619 | 5.36E-01 | 0.026   | 0.075   | 0.344  | 7.31E-01 |
| GCST90019511          | Insulin-like growth factor 1 levels | -0.120 | 0.072   | -1.662 | 9.66E-02        | -0.116     | 0.217   | -0.533 | 5.94E-01 | -0.022  | 0.071   | -0.308 | 7.58E-01 |
| GCST90000025          | Appendicular lean mass              | 0.038  | 0.054   | 0.704  | 4.82E-01        | -0.056     | 0.116   | -0.482 | 6.30E-01 | -0.023  | 0.056   | -0.415 | 6.78E-01 |
| GCST90018959          | Height                              | 0.041  | 0.057   | 0.717  | 4.73E-01        | 0.038      | 0.116   | 0.325  | 7.45E-01 | -0.030  | 0.057   | -0.536 | 5.92E-01 |
| GCST90020028          | Hip circumference adjusted for BMI  | -0.025 | 0.067   | -0.367 | 7.14E-01        | -0.038     | 0.154   | -0.245 | 8.06E-01 | -0.062  | 0.068   | -0.916 | 3.60E-01 |
| GCST006655            | Breast size                         | -0.365 | 0.380   | -0.963 | 3.36E-01        | -0.059     | 0.465   | -0.128 | 8.98E-01 | 0.223   | 0.319   | 0.699  | 4.84E-01 |
| GCST90018799          | Breast cancer                       | -0.055 | 0.130   | -0.421 | 6.74E-01        | -0.031     | 0.257   | -0.120 | 9.05E-01 | -0.132  | 0.129   | -1.023 | 3.06E-01 |

Table S9. Mendelian randomization of ESRI-associated traits on glycemic traits, related to Figure 6

| Exposure info         |                                    | Outcome: 0hGlu |         |        |       |                 |              | Outcome: GDM status |         |        |       |          | Outcome: GDM AUC |          |         |        |        |                 |                |
|-----------------------|------------------------------------|----------------|---------|--------|-------|-----------------|--------------|---------------------|---------|--------|-------|----------|------------------|----------|---------|--------|--------|-----------------|----------------|
| GWAS catalog study ID | Traits name                        | Estimate       | Stderr. | Zvalue | OR    | Pvalue          | (95% CI)     | Estimate            | Stderr. | Zvalue | OR    | Pvalue   | (95% CI)         | Estimate | Stderr. | Zvalue | OR     | Pvalue          | (95% CI)       |
| GCST006979            | Heel bone mineral density          | 0.076          | 0.227   | 0.334  | 1.079 | 7.38E-01        | (0.69, 1.68) | 0.206               | 1.640   | 0.125  | 1.228 | 9.00E-01 | (0.05, 30.60)    | 0.090    | 1.142   | 0.079  | 1.094  | 9.37E-01        | (0.12, 10.26)  |
| GCST90000025          | Appendicular lean mass             | -0.747         | 0.259   | -2.886 | 0.474 | <b>3.91E-03</b> | (0.29, 0.79) | -3.878              | 1.875   | -2.069 | 0.021 | 3.86E-02 | (0.00, 0.82)     | -3.123   | 1.302   | -2.400 | 0.044  | 1.64E-02        | (0.00, 0.56)   |
| GCST90000047          | Age at first sexual intercourse    | -0.004         | 0.037   | -0.095 | 0.996 | 9.24E-01        | (0.93, 1.07) | -0.014              | 0.270   | -0.051 | 0.986 | 9.59E-01 | (0.58, 1.67)     | -0.091   | 0.188   | -0.485 | 0.913  | 6.28E-01        | (0.63, 1.32)   |
| GCST90011804          | Breast cancer                      | -0.131         | 0.117   | -1.118 | 0.877 | 2.64E-01        | (0.70, 1.10) | -0.719              | 0.777   | -0.925 | 0.487 | 3.55E-01 | (0.11, 2.24)     | -0.935   | 0.540   | -1.730 | 0.393  | 8.36E-02        | (0.14, 1.13)   |
| GCST90019516          | Serum phosphate levels             | 0.422          | 0.144   | 2.930  | 1.525 | <b>3.40E-03</b> | (1.15, 2.02) | 0.402               | 1.038   | 0.387  | 1.495 | 6.99E-01 | (0.20, 11.44)    | 0.111    | 0.724   | 0.153  | 1.117  | 8.79E-01        | (0.27, 4.62)   |
| GCST90020028          | Hip circumference adjusted for BMI | -0.043         | 0.022   | -1.997 | 0.958 | 4.59E-02        | (0.92, 1.00) | 0.130               | 0.155   | 0.835  | 1.138 | 4.03E-01 | (0.84, 1.54)     | -0.069   | 0.108   | -0.632 | 0.934  | 5.27E-01        | (0.75, 1.15)   |
| GCST90018959          | Height                             | 0.437          | 0.196   | 2.224  | 1.548 | 2.61E-02        | (1.05, 2.28) | 1.598               | 1.714   | 0.933  | 4.943 | 3.51E-01 | (0.17, 142.15)   | 3.366    | 1.185   | 2.840  | 28.963 | <b>4.51E-03</b> | (2.84, 295.49) |
| GCST90018970          | Pulse pressure                     | 0.409          | 0.111   | 3.703  | 1.506 | <b>2.14E-04</b> | (1.21, 1.87) | 0.499               | 0.970   | 0.515  | 1.647 | 6.07E-01 | (0.25, 11.03)    | 1.740    | 0.670   | 2.597  | 5.700  | 9.41E-03        | (1.53, 21.20)  |

**Table S10. Transcriptome-wide association study for glycemic traits, related to STAR Methods**

| Tissue info                |                                         | 0hGlu           |         |                 | GDM status      |         |          | GDM AUC  |         |                 |          |
|----------------------------|-----------------------------------------|-----------------|---------|-----------------|-----------------|---------|----------|----------|---------|-----------------|----------|
| Category                   | Tissue                                  | Beta            | Stderr. | Pvalue          | Beta            | Stderr. | Pvalue   | Beta     | Stderr. | Pvalue          |          |
| Adipose                    | Adipose Subcutaneous                    | 5.594           | 2.950   | 5.80E-02        | 11.784          | 21.243  | 5.79E-01 | -11.120  | 14.835  | 4.54E-01        |          |
|                            | Adipose Visceral (Omentum)              | -2.922          | 0.739   | <b>7.77E-05</b> | -14.039         | 5.319   | 8.31E-03 | -8.498   | 3.720   | 2.24E-02        |          |
| Blood/Immune               | Cells EBV-transformed lymphocytes       | 0.851           | 0.252   | <b>7.48E-04</b> | 4.321           | 1.816   | 1.73E-02 | 2.335    | 1.270   | 6.59E-02        |          |
|                            | Spleen                                  | 0.089           | 0.918   | 9.23E-01        | -2.579          | 6.655   | 6.98E-01 | -7.382   | 4.619   | 1.10E-01        |          |
|                            | Whole Blood                             | -28.945         | 15.127  | 5.57E-02        | -61.981         | 108.560 | 5.68E-01 | -53.266  | 76.046  | 4.84E-01        |          |
| CNS                        | Brain Amygdala                          | 5.180           | 1.720   | 2.60E-03        | 24.459          | 12.324  | 4.72E-02 | 11.483   | 8.646   | 1.84E-01        |          |
|                            | Brain Anterior cingulate cortex (BA24)  | -1.414          | 0.412   | <b>5.95E-04</b> | -6.762          | 2.958   | 2.23E-02 | -3.831   | 2.071   | 6.43E-02        |          |
|                            | Brain Caudate (basal ganglia)           | -4.321          | 1.380   | 1.74E-03        | -18.077         | 10.047  | 7.20E-02 | -19.259  | 6.942   | 5.54E-03        |          |
|                            | Brain Cerebellar Hemisphere             | -0.065          | 1.032   | 9.50E-01        | -5.569          | 7.425   | 4.53E-01 | 0.849    | 5.186   | 8.70E-01        |          |
|                            | Brain Cerebellum                        | -2.715          | 0.666   | <b>4.57E-05</b> | -12.835         | 4.799   | 7.48E-03 | -9.493   | 3.350   | 4.61E-03        |          |
|                            | Brain Cortex                            | 1.688           | 1.579   | 2.85E-01        | 3.383           | 11.420  | 7.67E-01 | 16.232   | 7.942   | 4.10E-02        |          |
|                            | Brain Frontal Cortex (BA9)              | 0.496           | 0.449   | 2.69E-01        | 0.035           | 3.241   | 9.91E-01 | 0.302    | 2.257   | 8.94E-01        |          |
|                            | Brain Hippocampus                       | -12.308         | 9.696   | 2.04E-01        | 63.231          | 69.789  | 3.65E-01 | -13.170  | 48.767  | 7.87E-01        |          |
|                            | Brain Hypothalamus                      | -2.257          | 0.640   | <b>4.22E-04</b> | -4.449          | 4.601   | 3.34E-01 | -4.158   | 3.220   | 1.97E-01        |          |
|                            | Brain Nucleus accumbens (basal ganglia) | -2.137          | 0.408   | <b>1.69E-07</b> | -6.178          | 2.919   | 3.43E-02 | -6.236   | 2.056   | 2.43E-03        |          |
|                            | Brain Putamen (basal ganglia)           | -3.997          | 1.587   | 1.18E-02        | -18.198         | 11.534  | 1.15E-01 | -9.970   | 7.985   | 2.12E-01        |          |
|                            | Brain Spinal cord (cervical c-1)        | 0.318           | 0.218   | 1.45E-01        | 1.960           | 1.576   | 2.14E-01 | 1.764    | 1.099   | 1.09E-01        |          |
|                            | Brain Substantia nigra                  | -5.209          | 1.684   | 1.99E-03        | -27.008         | 12.140  | 2.61E-02 | -13.290  | 8.475   | 1.17E-01        |          |
|                            | Cardiovascular                          | Artery Aorta    | 3.261   | 1.522           | 3.22E-02        | 10.779  | 11.085   | 3.31E-01 | 21.671  | 7.660           | 4.67E-03 |
|                            |                                         | Artery Coronary | -5.648  | 1.605           | <b>4.34E-04</b> | -26.222 | 11.520   | 2.28E-02 | -12.912 | 8.073           | 1.10E-01 |
| Artery Tibial              |                                         | 4.367           | 0.858   | <b>3.61E-07</b> | 13.848          | 6.157   | 2.45E-02 | 16.170   | 4.318   | <b>1.81E-04</b> |          |
| Heart Atrial Appendage     |                                         | 1.106           | 1.711   | 5.18E-01        | -6.927          | 12.338  | 5.75E-01 | 7.991    | 8.596   | 3.53E-01        |          |
| Heart Left Ventricle       |                                         | -1.919          | 0.803   | 1.68E-02        | -3.601          | 5.781   | 5.33E-01 | -0.204   | 4.041   | 9.60E-01        |          |
| Colon Sigmoid              |                                         | -3.848          | 3.696   | 2.98E-01        | -30.791         | 26.708  | 2.49E-01 | -14.250  | 18.585  | 4.43E-01        |          |
| Digestive                  | Colon Transverse                        | -3.170          | 0.908   | <b>4.86E-04</b> | -16.483         | 6.535   | 1.17E-02 | -8.894   | 4.570   | 5.17E-02        |          |
|                            | Esophagus Gastroesophageal Junction     | 18.303          | 6.506   | 4.91E-03        | 80.647          | 46.713  | 8.43E-02 | 31.393   | 32.730  | 3.37E-01        |          |
|                            | Esophagus Mucosa                        | 5.802           | 2.101   | 5.75E-03        | 32.588          | 15.131  | 3.13E-02 | 20.353   | 10.566  | 5.41E-02        |          |
|                            | Esophagus Muscularis                    | 1.008           | 1.311   | 4.42E-01        | -0.880          | 9.480   | 9.26E-01 | -7.531   | 6.598   | 2.54E-01        |          |
|                            | Small Intestine Terminal Ileum          | 5.524           | 1.615   | <b>6.26E-04</b> | 25.208          | 11.580  | 2.95E-02 | 11.449   | 8.124   | 1.59E-01        |          |
|                            | Stomach                                 | 6.243           | 2.339   | 7.61E-03        | 31.010          | 16.714  | 6.35E-02 | 16.135   | 11.754  | 1.70E-01        |          |
|                            | Adrenal Gland                           | 8.190           | 3.202   | 1.05E-02        | 37.301          | 22.863  | 1.03E-01 | 22.234   | 16.093  | 1.67E-01        |          |
| Endocrine                  | Pancreas                                | -2.558          | 1.479   | 8.38E-02        | -17.109         | 10.611  | 1.07E-01 | -7.161   | 7.434   | 3.35E-01        |          |
|                            | Pituitary                               | 12.214          | 2.518   | <b>1.24E-06</b> | 44.345          | 18.084  | 1.42E-02 | 37.282   | 12.682  | 3.29E-03        |          |
|                            | Thyroid                                 | 2.616           | 0.865   | 2.50E-03        | 11.291          | 6.244   | 7.06E-02 | 10.724   | 4.353   | 1.38E-02        |          |
|                            | Liver                                   | -7.394          | 4.853   | 1.28E-01        | -54.706         | 34.872  | 1.17E-01 | -22.213  | 24.392  | 3.62E-01        |          |
| Musculoskeletal/connective | Muscle Skeletal                         | -10.001         | 3.362   | 2.94E-03        | -37.286         | 24.057  | 1.21E-01 | -23.627  | 16.902  | 1.62E-01        |          |
| Reproductive               | Ovary                                   | -20.964         | 5.951   | <b>4.28E-04</b> | -76.249         | 42.746  | 7.45E-02 | -47.004  | 29.927  | 1.16E-01        |          |
|                            | Prostate                                | -3.601          | 0.740   | <b>1.15E-06</b> | -9.072          | 5.291   | 8.64E-02 | -10.074  | 3.723   | 6.82E-03        |          |
|                            | Testis                                  | -3.334          | 2.109   | 1.14E-01        | -18.805         | 15.407  | 2.22E-01 | -26.571  | 10.610  | 1.23E-02        |          |
|                            | Uterus                                  | 0.290           | 0.219   | 1.84E-01        | 2.592           | 1.575   | 9.99E-02 | 0.858    | 1.099   | 4.35E-01        |          |
|                            | Vagina                                  | -0.498          | 0.150   | <b>9.18E-04</b> | -2.448          | 1.081   | 2.35E-02 | -1.328   | 0.755   | 7.88E-02        |          |
|                            | Breast Mammary Tissue                   | -8.010          | 3.230   | 1.32E-02        | -50.069         | 23.264  | 3.14E-02 | -19.646  | 16.245  | 2.27E-01        |          |

Other

|                                   |         |       |                 |         |        |          |         |        |                 |
|-----------------------------------|---------|-------|-----------------|---------|--------|----------|---------|--------|-----------------|
| Cells Transformed fibroblasts     | -13.224 | 2.630 | <b>5.00E-07</b> | -46.871 | 18.969 | 1.35E-02 | -44.936 | 13.242 | <b>6.92E-04</b> |
| Kidney Cortex                     | -1.762  | 0.924 | 5.65E-02        | -6.758  | 6.599  | 3.06E-01 | -4.428  | 4.644  | 3.40E-01        |
| Lung                              | 20.361  | 5.216 | <b>9.53E-05</b> | 74.485  | 37.386 | 4.63E-02 | 42.162  | 26.222 | 1.08E-01        |
| Minor Salivary Gland              | -3.379  | 1.122 | 2.61E-03        | -17.953 | 8.067  | 2.60E-02 | -9.387  | 5.643  | 9.62E-02        |
| Nerve Tibial                      | -4.228  | 0.844 | <b>5.58E-07</b> | -11.668 | 6.036  | 5.32E-02 | -12.328 | 4.247  | 3.70E-03        |
| Skin Not Sun Exposed (Suprapubic) | -10.573 | 3.592 | 3.25E-03        | -46.750 | 25.791 | 6.99E-02 | -14.686 | 18.055 | 4.16E-01        |
| Skin Sun Exposed (Lower leg)      | -3.269  | 2.084 | 1.17E-01        | -18.319 | 14.996 | 2.22E-01 | -7.293  | 10.477 | 4.86E-01        |

## References

1. Sakaue, S., Kanai, M., Tanigawa, Y., Karjalainen, J., Kurki, M., Koshihara, S., Narita, A., Konuma, T., Yamamoto, K., Akiyama, M., et al. (2021). A cross-population atlas of genetic associations for 220 human phenotypes. *Nature genetics* 53, 1415-1424. 10.1038/s41588-021-00931-x.
2. Pei, Y.F., Liu, Y.Z., Yang, X.L., Zhang, H., Feng, G.J., Wei, X.T., and Zhang, L. (2020). The genetic architecture of appendicular lean mass characterized by association analysis in the UK Biobank study. *Commun Biol* 3, 608. 10.1038/s42003-020-01334-0.
3. Christakoudi, S., Evangelou, E., Riboli, E., and Tsilidis, K.K. (2021). GWAS of allometric body-shape indices in UK Biobank identifies loci suggesting associations with morphogenesis, organogenesis, adrenal cell renewal and cancer. *Sci Rep* 11, 10688. 10.1038/s41598-021-89176-6.
4. Morris, J.A., Kemp, J.P., Youlten, S.E., Laurent, L., Logan, J.G., Chai, R.C., Vulpescu, N.A., Forgetta, V., Kleinman, A., Mohanty, S.T., et al. (2019). An atlas of genetic influences on osteoporosis in humans and mice. *Nature genetics* 51, 258-266. 10.1038/s41588-018-0302-x.
5. Hirata, T., Koga, K., Johnson, T.A., Morino, R., Nakazono, K., Kamitsuji, S., Akita, M., Kawajiri, M., Kami, A., Hoshi, Y., et al. (2018). Japanese GWAS identifies variants for bust-size, dysmenorrhea, and menstrual fever that are eQTLs for relevant protein-coding or long non-coding RNAs. *Sci Rep* 8, 8502. 10.1038/s41598-018-25065-9.
6. Sinnott-Armstrong, N., Tanigawa, Y., Amar, D., Mars, N., Benner, C., Aguirre, M., Venkataraman, G.R., Wainberg, M., Ollila, H.M., Kiiskinen, T., et al. (2021). Genetics of 35 blood and urine biomarkers in the UK Biobank. *Nature genetics* 53, 185-194. 10.1038/s41588-020-00757-z.
7. Mills, M.C., Tropf, F.C., Brazel, D.M., van Zuydam, N., Vaez, A., Pers, T.H., Snieder, H., Perry, J.R.B., Ong, K.K., den Hoed, M., et al. (2021). Identification of 371 genetic variants for age at first sex and birth linked to externalising behaviour. *Nat Hum Behav* 5, 1717-1730. 10.1038/s41562-021-01135-3.
8. Rashkin, S.R., Graff, R.E., Kachuri, L., Thai, K.K., Alexeeff, S.E., Blatchins, M.A., Cavazos, T.B., Corley, D.A., Emami, N.C., Hoffman, J.D., et al. (2020). Pan-cancer study detects genetic risk variants and shared genetic basis in two large cohorts. *Nature communications* 11, 4423. 10.1038/s41467-020-18246-6.
